# Supplementary material
Source: PubMed Central journal article supplement (PMC4019173)
Supplement: IAI.01521-14_zii999090694so1.pdf [file IAI.01521-14_zii999090694so1.pdf]

## *fetA*

```

                -35                                -10                                +1
Ref1Ng12C (16) 5' ATA ATC AGC TTT ACA CAA --C CCC CCC CCC CC- -GC TAA TAT AAA CAA AAA
Ref1Ng11C (15) 5' ATA ATC AGC TTT ACA CAA --C CCC CCC CCC C-- -GC TAA TAT AAA CAA AAA
Ref2Nm10C (17) 5' ATA ATC AGC TTT GCA AAA ATC CCC CCC CCC --- TGT TAA TAT AAA TAA AAA
Ref2Nm11C (18) 5' ATA ATC AGC TTT GCA AAA ATC CCC CCC CCC C-- TGT TAA TAT AAA TAA AAA
cc174 11C (18) 5' ATA ATC AGC TTT GCA AAA ATC CCC CCC CCC C-- TGT TAA TAT AAA TAA AAA
cc174 10C (17) 5' ATA ATC AGC TTT GCA AAA ATC CCC CCC CCC --- TGT TAA TAT AAA TAA AAA
cc174 9C (16) 5' ATA ATC AGC TTT GCA AAA ATC CCC CCC CC- --- TGT TAA TAT AAA TAA AAA
cc174 8C (15) 5' ATA ATC AGC TTT GCA AAA ATC CCC CCC C-- --- TGT TAA TAT AAA TAA AAA
cc60 6C (16) 5' ATA ATC AGC TTT ACA CAA ATC CCC CCT CTC --- -GT TAA TAT AAA CAA AAA
```

## *porA*

```

Ref3 12G (18) 5' NNN NNA AAA TGG TTT TTT GCG GGG GGG GGG GG- TAT AAT GGG ATN NNN NN
cc174 12G (18) 5' NNN GAA AAA TGG TTT TTT GCG GGG GGG GGG GG- TAT AAT TGA AGA CGT AT
cc60 13G (18) 5' NNN GAA AAA TGG TTT TTT GCG GGG GGG GGG GG- GAT AAT TGA AGA CGT AT
```

Figure A1. Promoter sequences of *fetA* and *porA* genes. Sequences of the promoter regions were obtained for each clonal complex from sequencing of PCR products spanning the promoters and repeat tracts. Sequences were aligned with published sequences for variants in which expression had been assessed. The predicted -10/-35 regions are highlighted in red, the transcriptional start is highlighted in green, the lengths of the repeat tract (e.g. 12C or 12G) and the spacer (shown in the brackets as the number of bp) are indicated. Note that the Delaney *et al.* (2006) definitions for the -35 and -10 elements of the *fetA* promoter were utilised herein. For *fetA* (*frpB*) sequences were aligned to *Neisseria gonorrhoeae* FA1090 sequences (Ref1Ng) derived from Carson *et al.* (2000; Mol. Micro. **36**:585-593; who found that a spacer of 12C/16 bp spacer is associated with high expression and one of 11C/15 bp with low expression) and to *N. meningitidis* sequences (Ref2Nm) derived from Delaney *et al.* (2006; J. Bact. **188**:2483-2492; who found a 10C/17 bp spacer tract has high expression whilst an 11C/18 bp spacer has low expression). For *porA*, sequences were aligned to the *porA* sequence for an allele of a *N. meningitidis* strain exhibiting a non-interrupted G-tract and the highest expression as observed by van der Ende *et al.* (2000; Infect. Imm. **68**: 6685-6690).

(A)

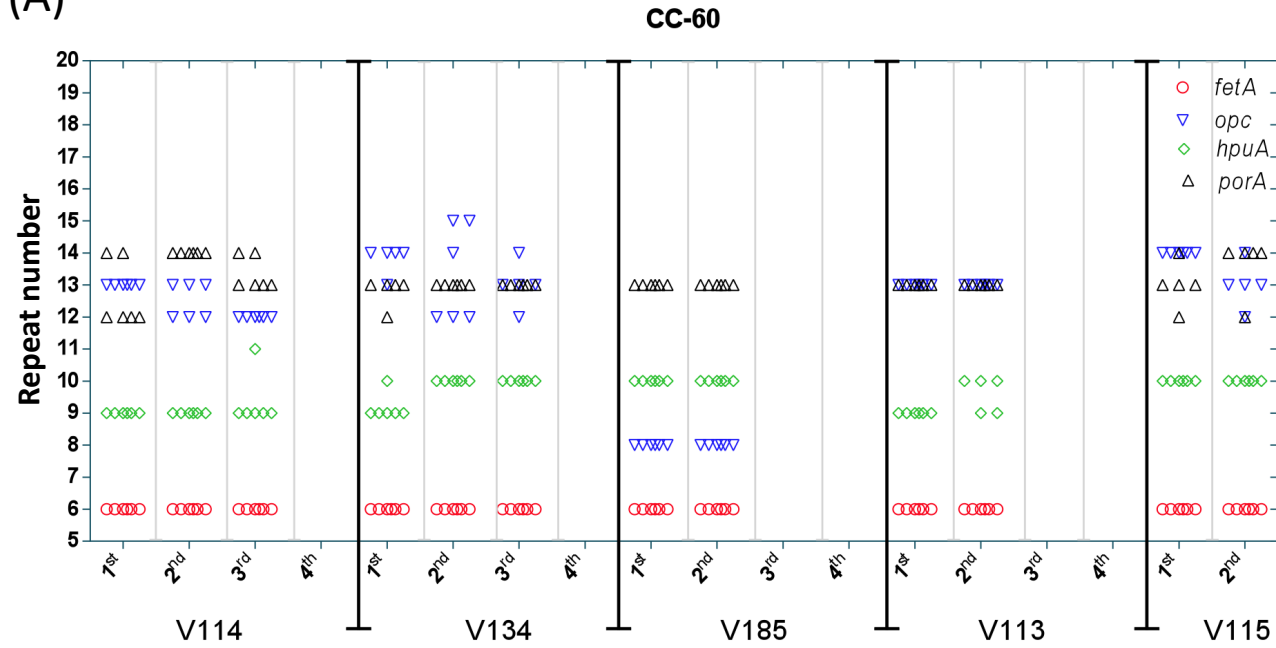

(B)

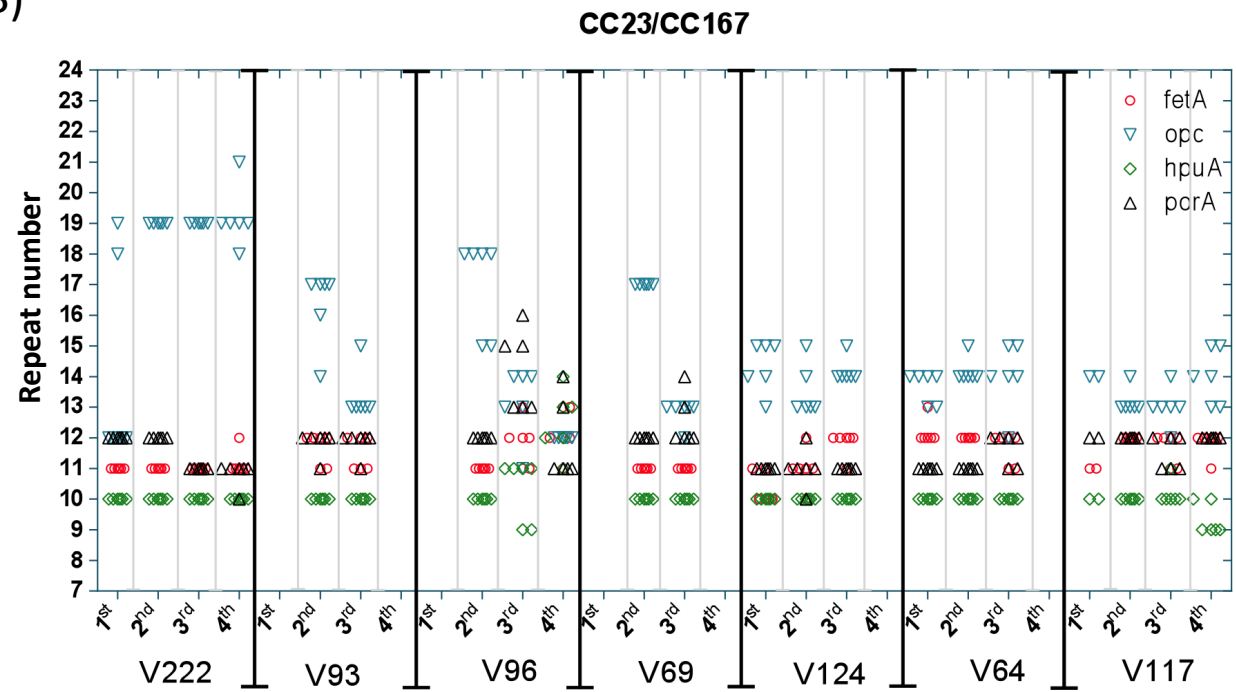

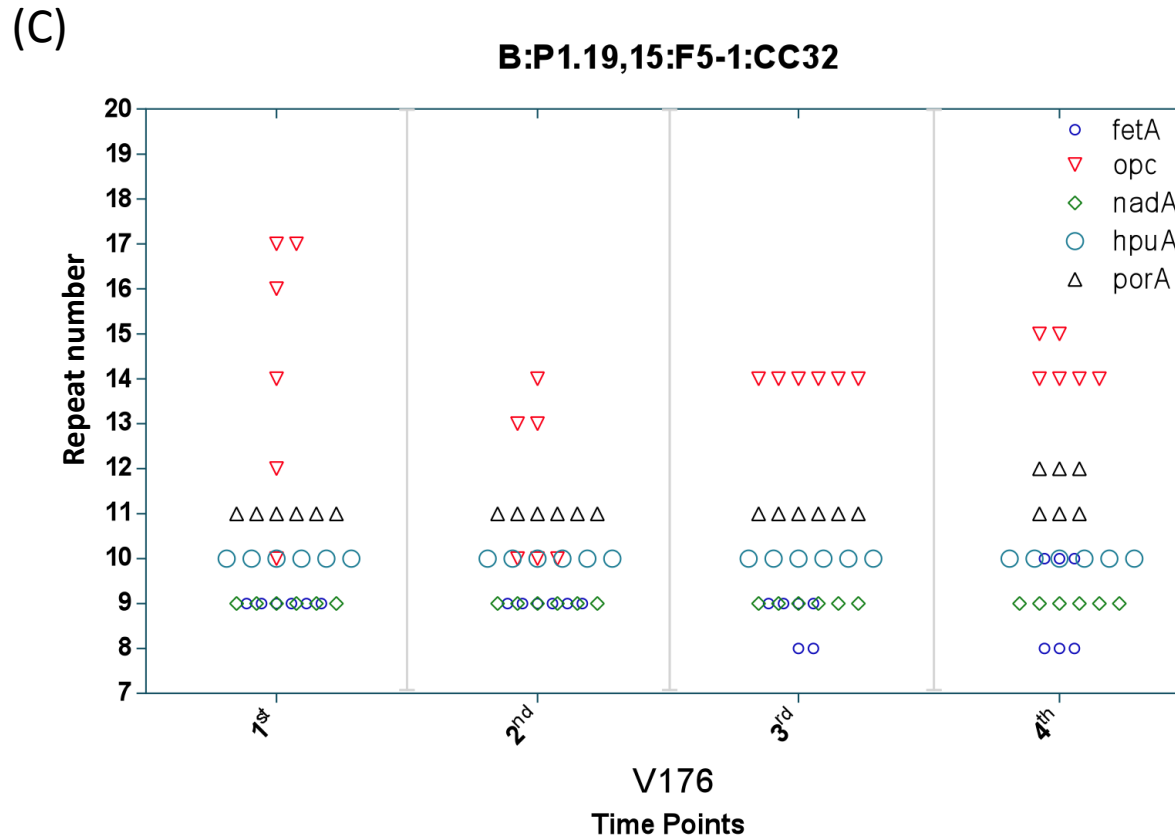

Figure A2. Changes in repeat tract length of five genes during persistent carriage of cc60, cc167, cc23 and cc32 strains. Meningococcal isolates were collected from volunteers (V) persistently colonised with a single strain. Up to six isolates were analysed for up to four time points (1<sup>st</sup>-4<sup>th</sup> which were separated by 1, 2, or 3 months respectively) for the number of simple sequence repeats in four/five phase variable genes. Panel (A), cc60 strains; panel (B), cc167 and cc23 strains; (C), a cc32 strain.

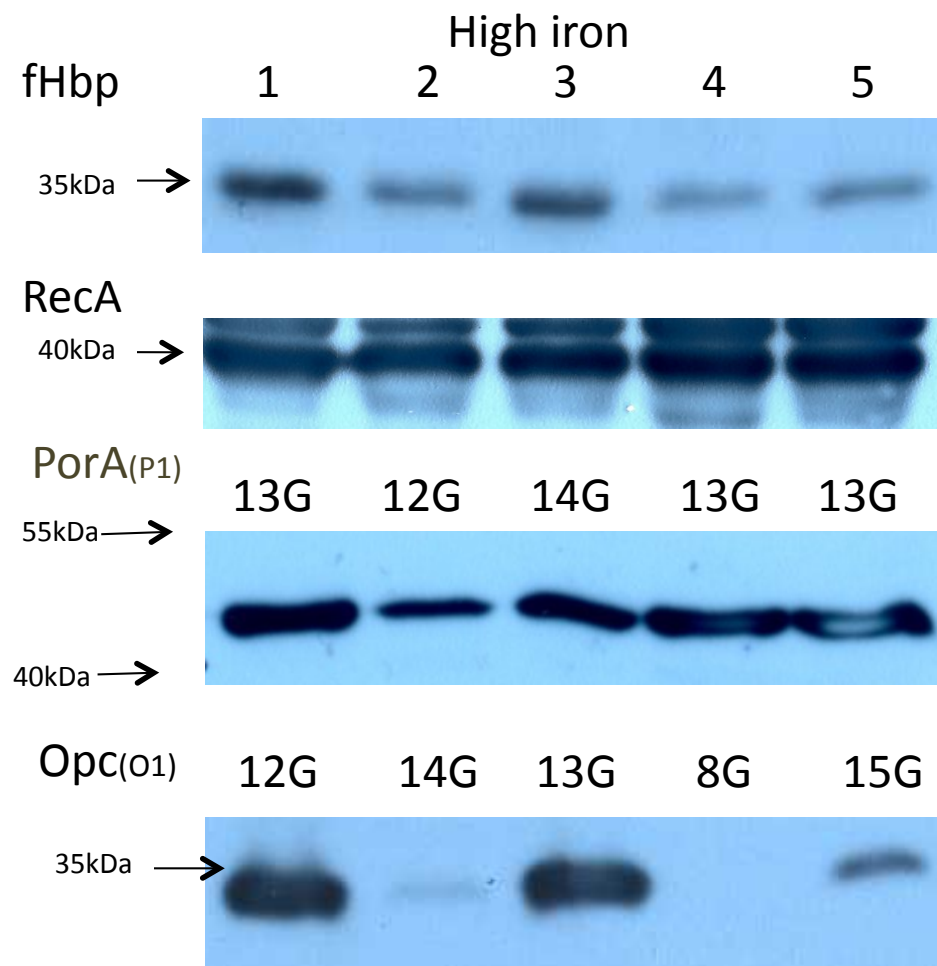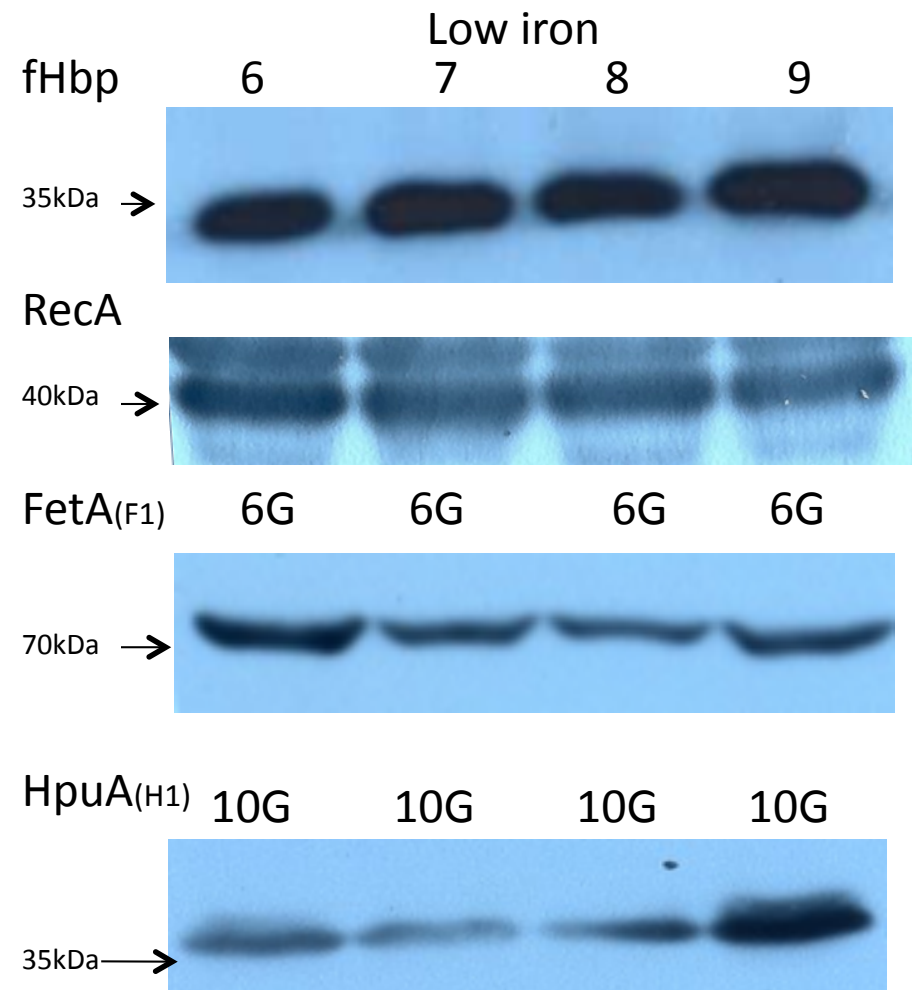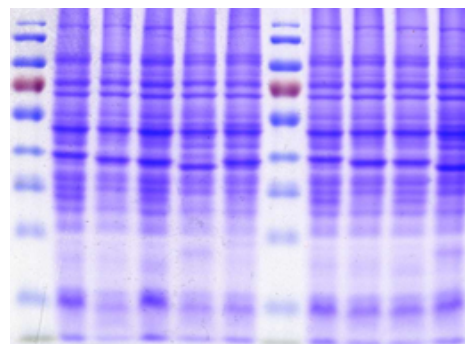

Figure A3. Protein expression levels for cc60 (29E:P1.5,2:F1-7:ST1655:cc60) strains. Whole cells lysates were prepared from meningococcal cells grown to mid-log phase with or without induction of iron-repressed genes. Induction was performed by the addition of desferal to a mid-log phase culture and incubation for an additional 1-2 hours. Equivalent amounts of lysate were loaded onto a 10% PAGE gel and subjected to electrophoresis. Gels were then stained with a Coomassie blue solution (lower panel). Western blots were probed with a 1:1,000-1:2,000 dilution of primary antibody followed by a 1:2,000 dilution of a goat anti-mouse IgG horseradish peroxidase-conjugated antibody. Primary antibodies were as follows:- RecA, anti-*E. coli* RecA mouse polyclonal sera; fHBP, a polyclonal mouse sera specific for variant 1 of fHBP; FetA, an anti-F1-3 FetA variant mouse polyclonal sera; HpuA, an anti-HpuA-8047 polyclonal mouse sera; PorA, anti-meningococcal serotype P1.5 mAb; Opc, B306, an anti-Opc mouse mAb. The repeat tract lengths for the phase variable genes of each isolate are indicated above the relevant lane as the number of 'G's present in the polyG tract. Lanes 1 and 6, N134.1; lanes 2 and 7, N282.3; lanes 3 and 8, N306.1; lanes 4 and 9, N295.3; lane 5, N295.1. Lanes 1-5, no induction; lanes 6-9, induction of iron-repressed genes.

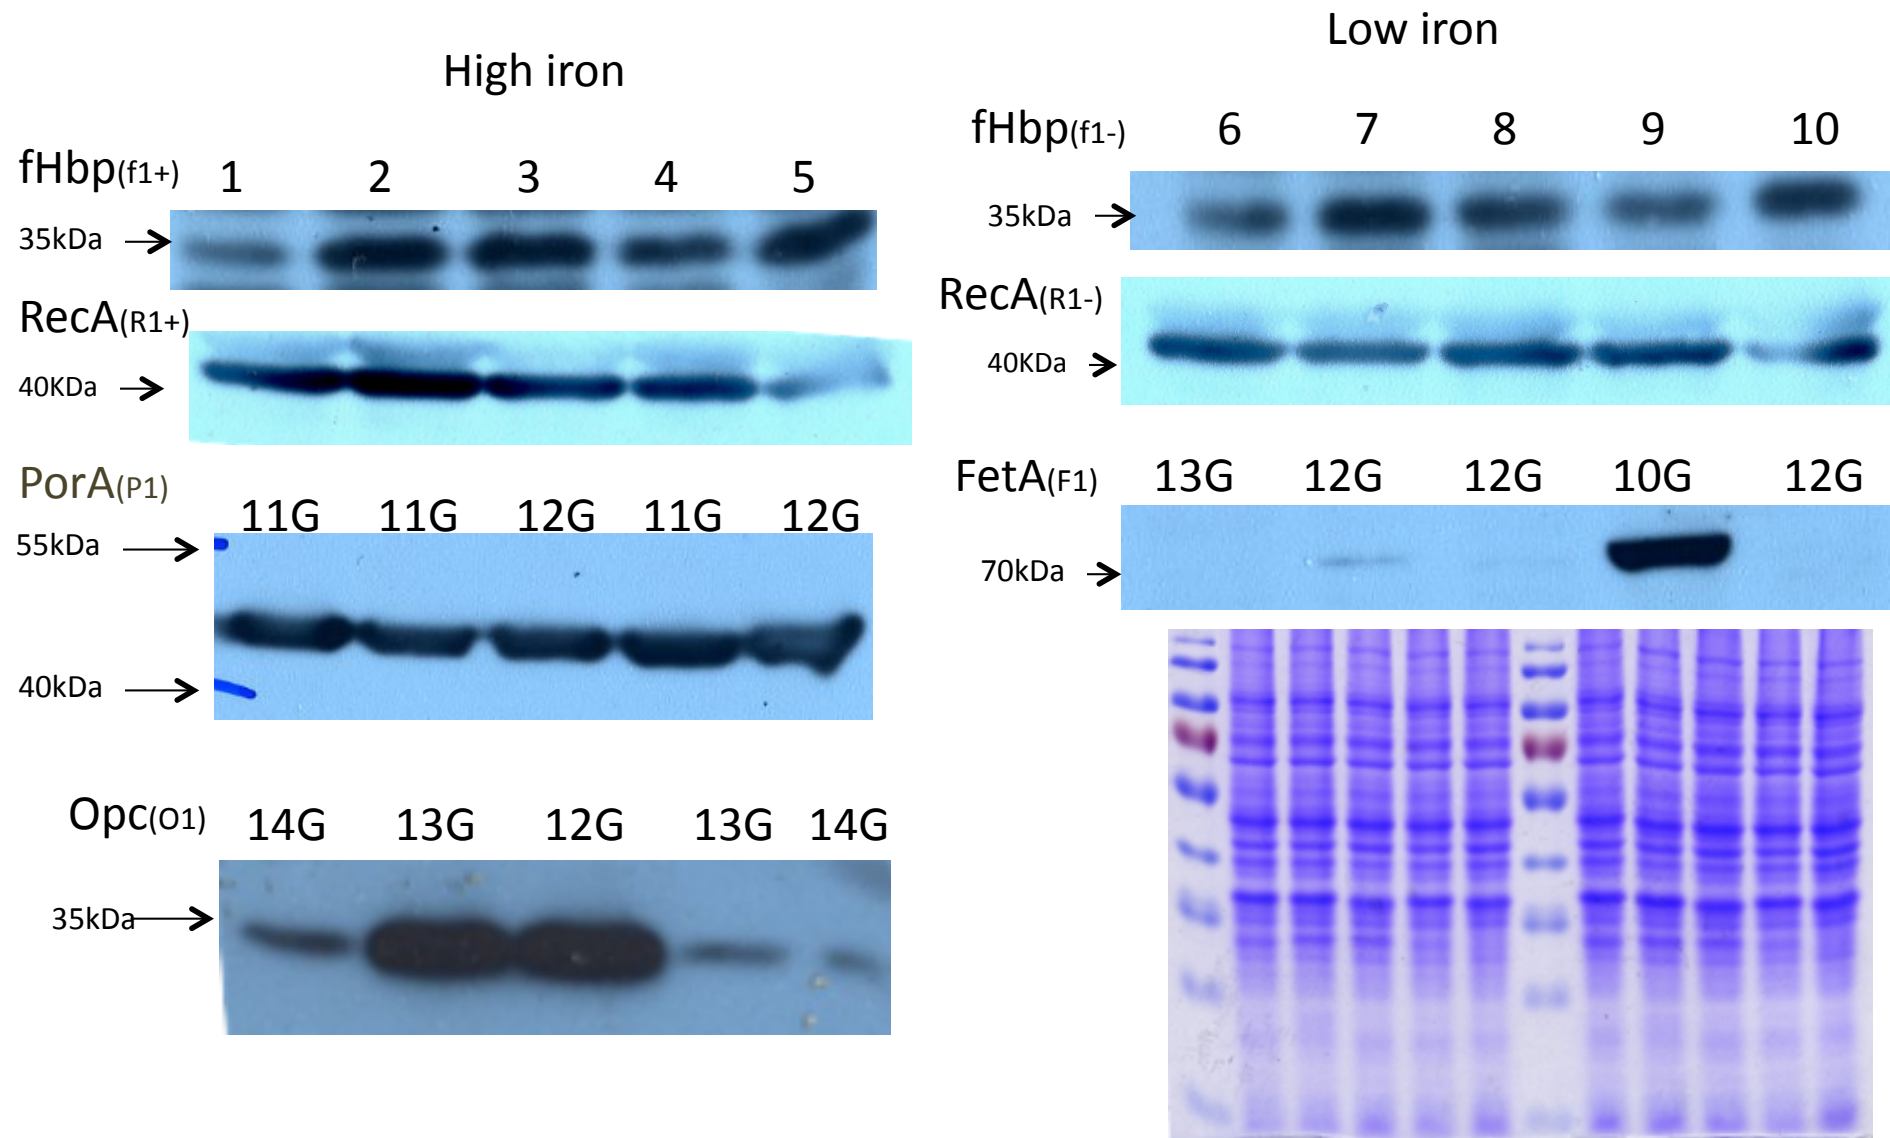

Figure A4. Protein expression levels for cc167 (Y:P1.5-1,10-1:F1-3:ST767:cc167) strains. Sample preparation and Western blots were as described in Figures 2 and 3 except that the FetA Western blot was performed with an anti-F1-5 antisera. Lanes 1 and 6, N64.1; lanes 2 and 7, N332.2; lanes 3 and 8, N332.3; lanes 4 and 9, N124.3; lanes 5 and 10, N348.4. Lanes 1-5, no induction; lanes 6-10, induction of iron-repressed genes.

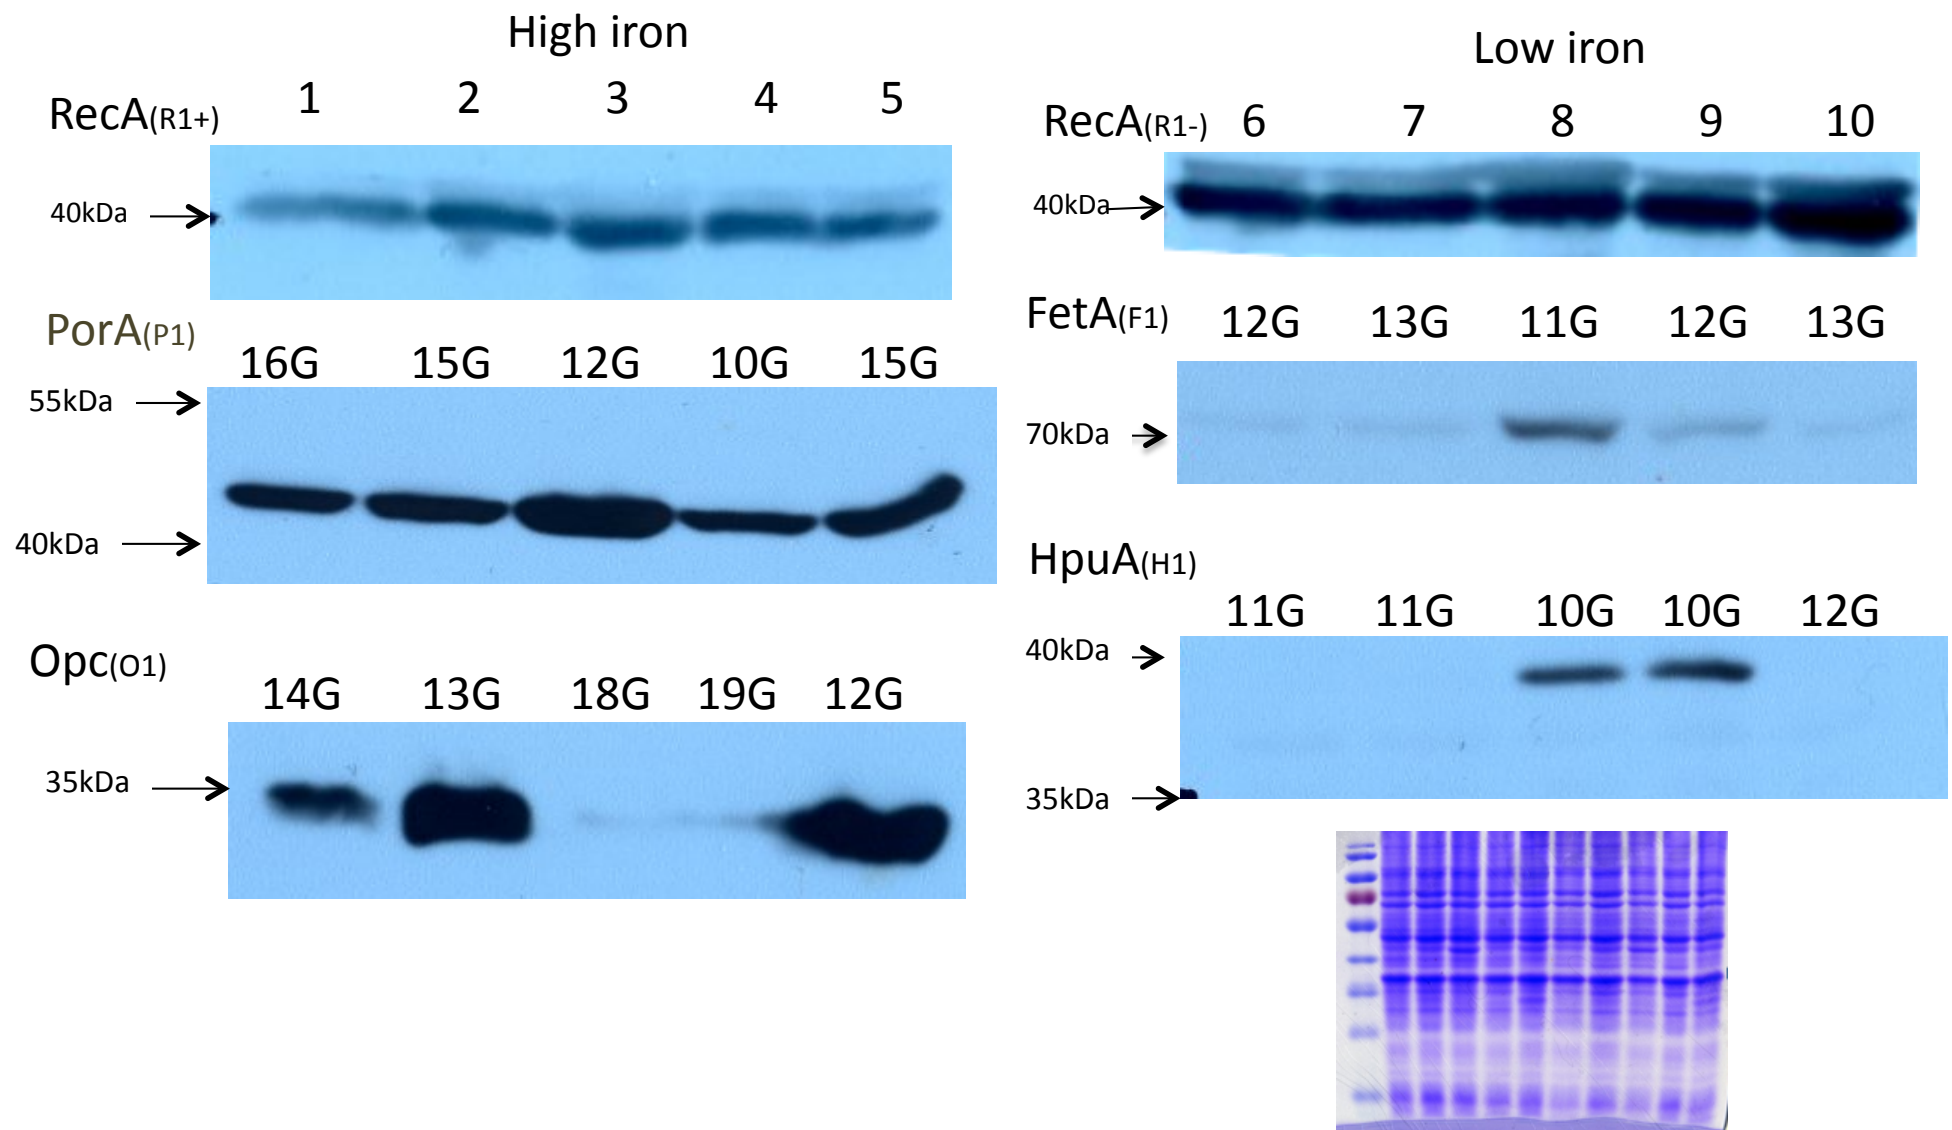

Figure A5. Protein expression levels for cc23 (Y:P1.5-1,10-1:F4-1:ST1655:cc23) strains. Sample preparation and Western blots were as described in Figures 2 and 3 except that the FetA Western blot was performed with an anti-F5-5 antisera. Lanes 1 and 6, N370.5; lanes 2 and 7, N370.4; lanes 3 and 8, N259.4; lanes 4 and 9, N459.6; lanes 5 and 10, N445.6. Lanes 1-5, no induction; lanes 6-10, induction of iron-repressed genes.

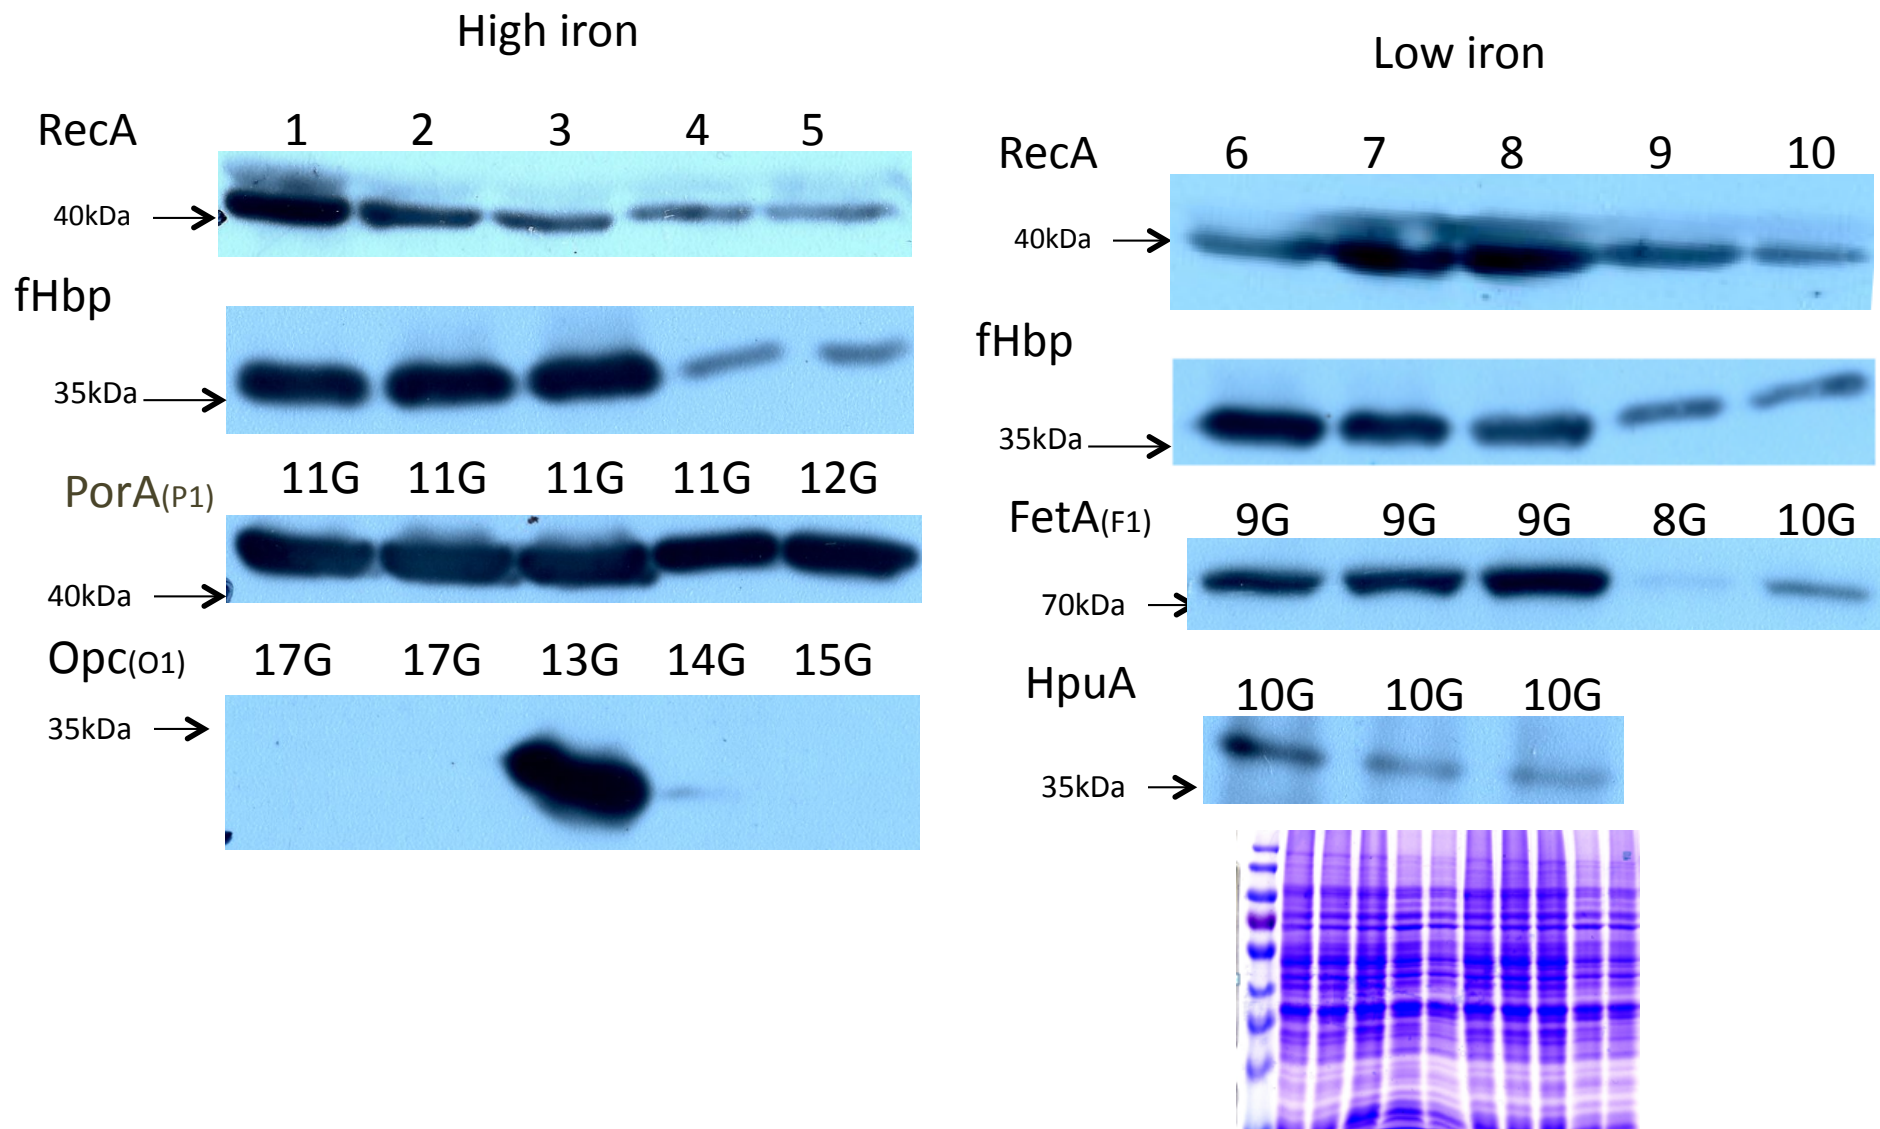

Figure A6. Protein expression levels for cc32 (B:P1.19,15:F5-1:ST5682:cc32) strains. Sample preparation and Western blots were as described in Figures 2 and 3 except that the FetA Western blot was performed with an anti-F5-5 antisera. Lanes 1 and 6, N176.3; lanes 2 and 7, N176.6; lanes 3 and 8, N318.6; lanes 4 and 9, N399.2; lanes 5 and 10, N408.3. Lanes 1-5, no induction; lanes 6-10, induction of iron-repressed genes.



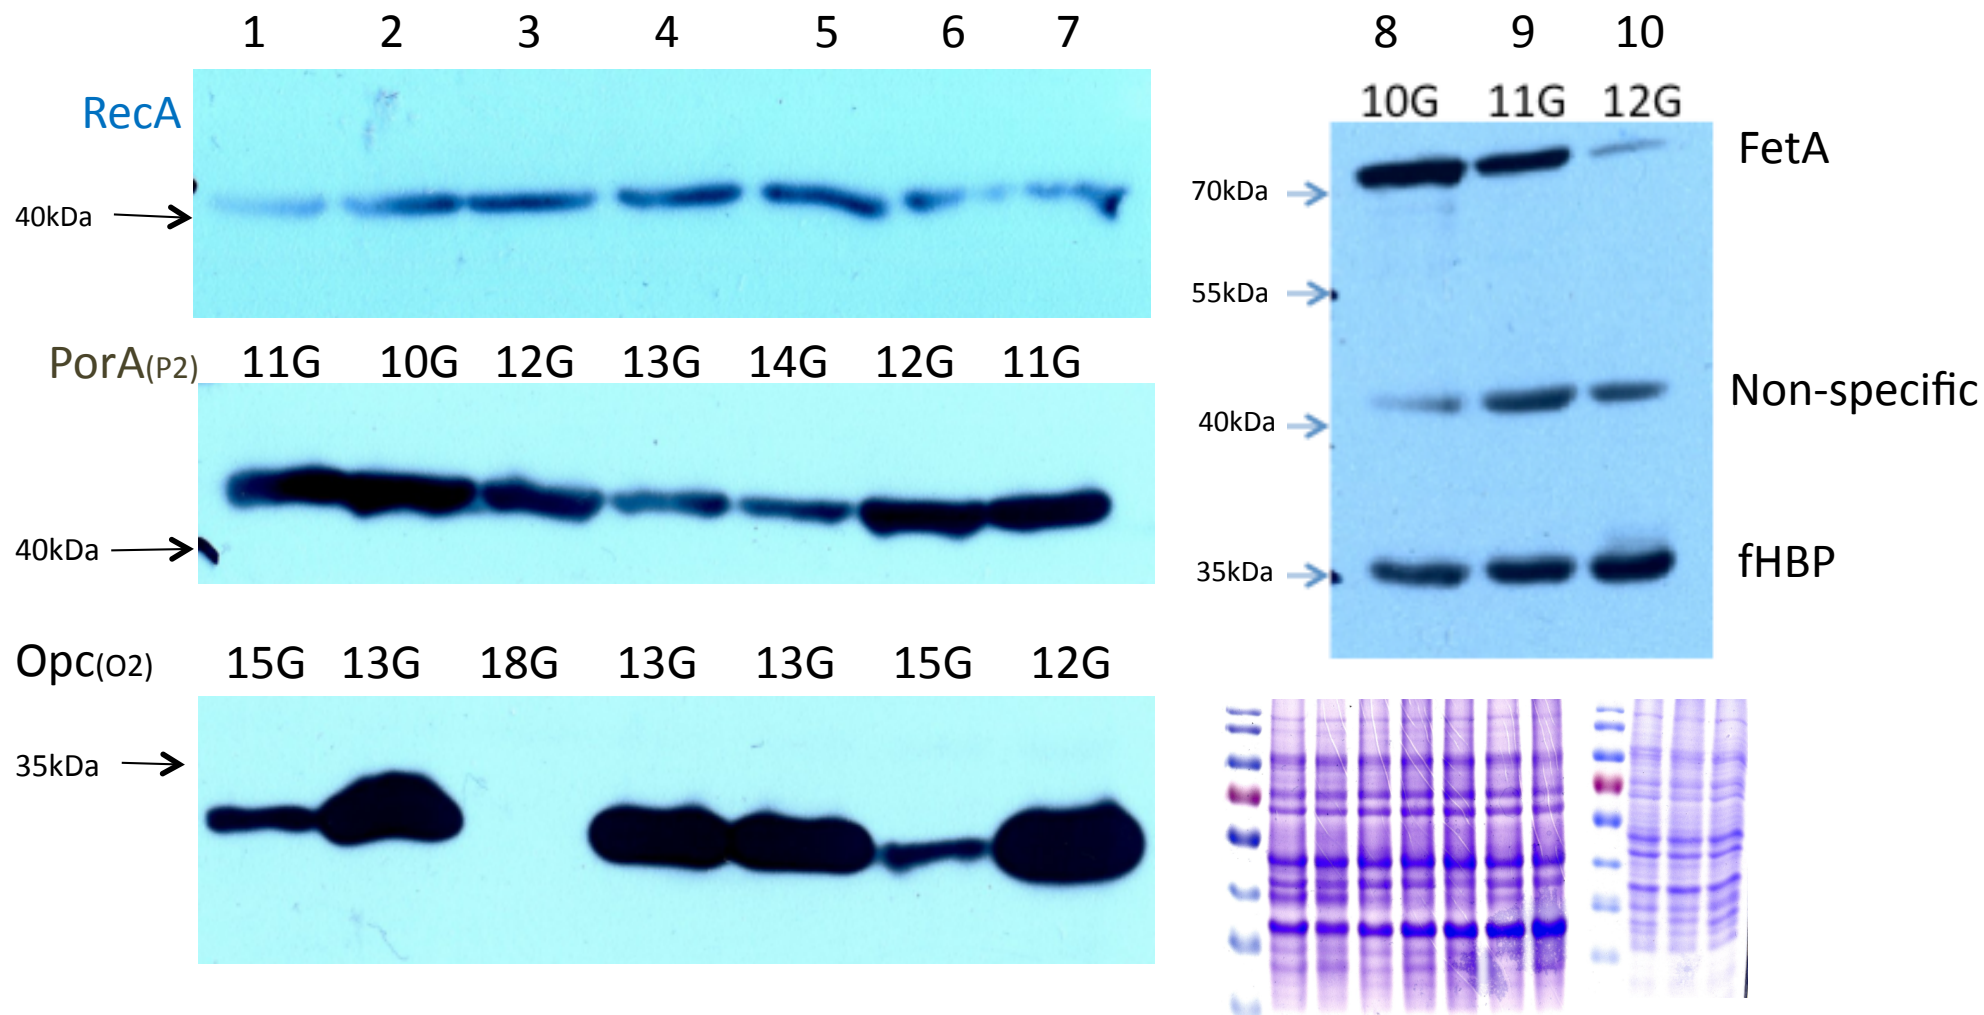

Figure A7. Protein expression levels for additional cc167 (N124, N290) and cc23 (N258, N431, N259 and N445) isolates. Sample preparation and Western blots were as described in Figures 2, 3 and 4. Primary antibodies were as follows:- RecA, anti-*E. coli* RecA mouse polyclonal sera; PorA, anti-meningococcal serotype P1.5 mAb; Opc, B306, an anti-Opc mouse mAb. Lane 1, N124.1; lanes 2, N290.5; lane 3, N258.1; lane 4, N431.5; lane 5, N431.6; lane 6, N259.3; lane 7, N445.1, lane 8, N369.1; lane 9, N352.3; lane 10, N438.3. Lanes 1-7, no induction; lanes 8-10, induction of iron-repressed genes.

(A) PorA – cc174 isolates

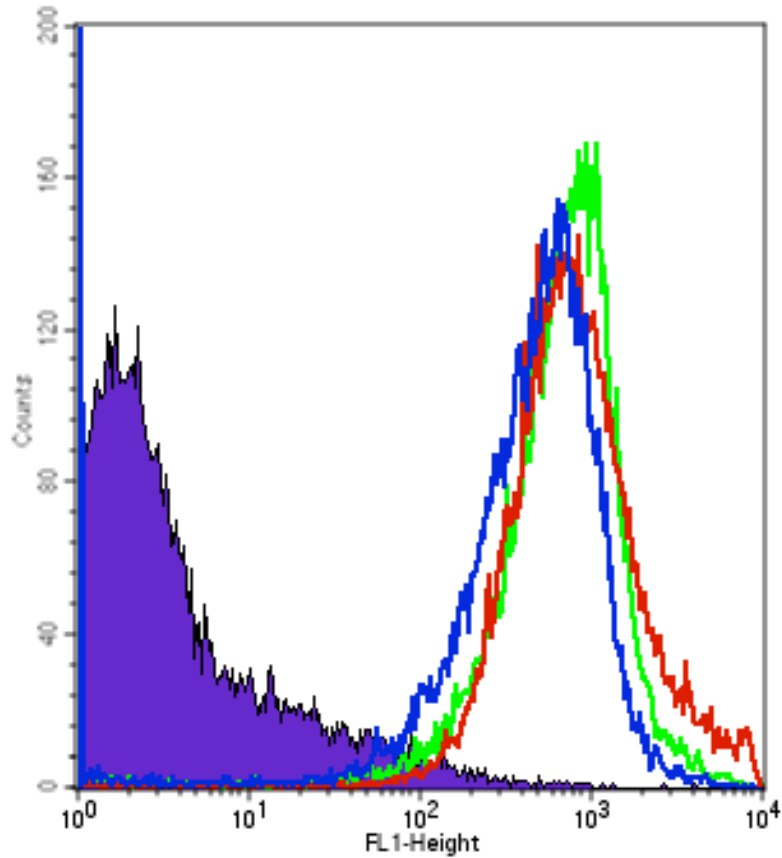

| Key | Name                       | Parameter | Gate    |
|-----|----------------------------|-----------|---------|
| ■   | Por A negative control.001 | FL1-H     | No Gate |
| —   | Por A (11G).001            | FL1-H     | No Gate |
| —   | Por A (12G).001            | FL1-H     | No Gate |
| —   | Por A (13G).001            | FL1-H     | No Gate |

(B) FetA – cc32 isolates

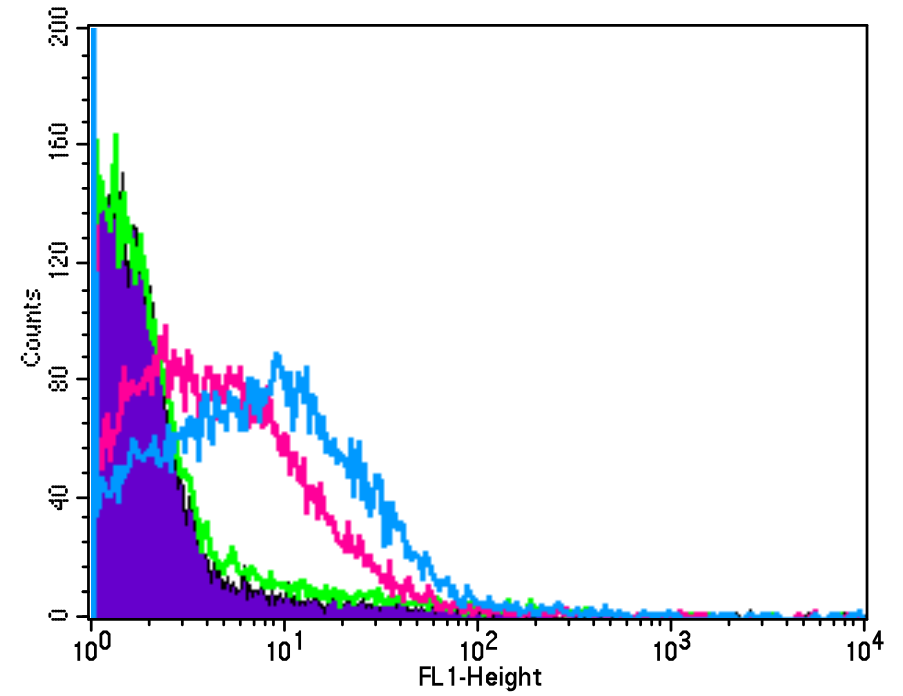

| Key | Name                       | Parameter | Gate    |
|-----|----------------------------|-----------|---------|
| ■   | Fet-A negative control.001 | FL1-H     | No Gate |
| —   | Fet-A (1) 2.001            | FL1-H     | No Gate |
| —   | Fet-A (2) 2.001            | FL1-H     | No Gate |
| —   | Fet-A (3) 3.001            | FL1-H     | No Gate |

Figure A8. Relative surface expression levels for PorA in cc174 isolates and FetA in cc32 isolates. Meningococcal cells were harvested from mid-log phase cultures and fixed in formaldehyde. Cells were probed with either mAb P1.16 (specific for one of the variable regions of the P1.16 variant of the PorA protein) or anti-FetA polyclonal mouse sera followed by a anti-mouse FITC conjugated-goat antibodies. Meningococcal cells incubated with the secondary antibody alone were utilised as the negative control. Fluorescent cells were detected in FACs Scanner. Panel (A), PorA:- green line, isolate N369.1, 11G tract; red line, isolate N438.3, 12G tract; blue line, isolate N288.5, 13G tract; blue block, negative control. Panel (B), FetA:- green line, isolate N399.2, 8C tract; red line, isolate N408.3, 10C tract; blue line, isolate N176.3, 9C tract; blue block, negative control. The geometric mean fluorescent intensities for the FetA samples after subtraction of background were:- 0.23 (8G), 2.12 (10C) and 4.22 (9C).

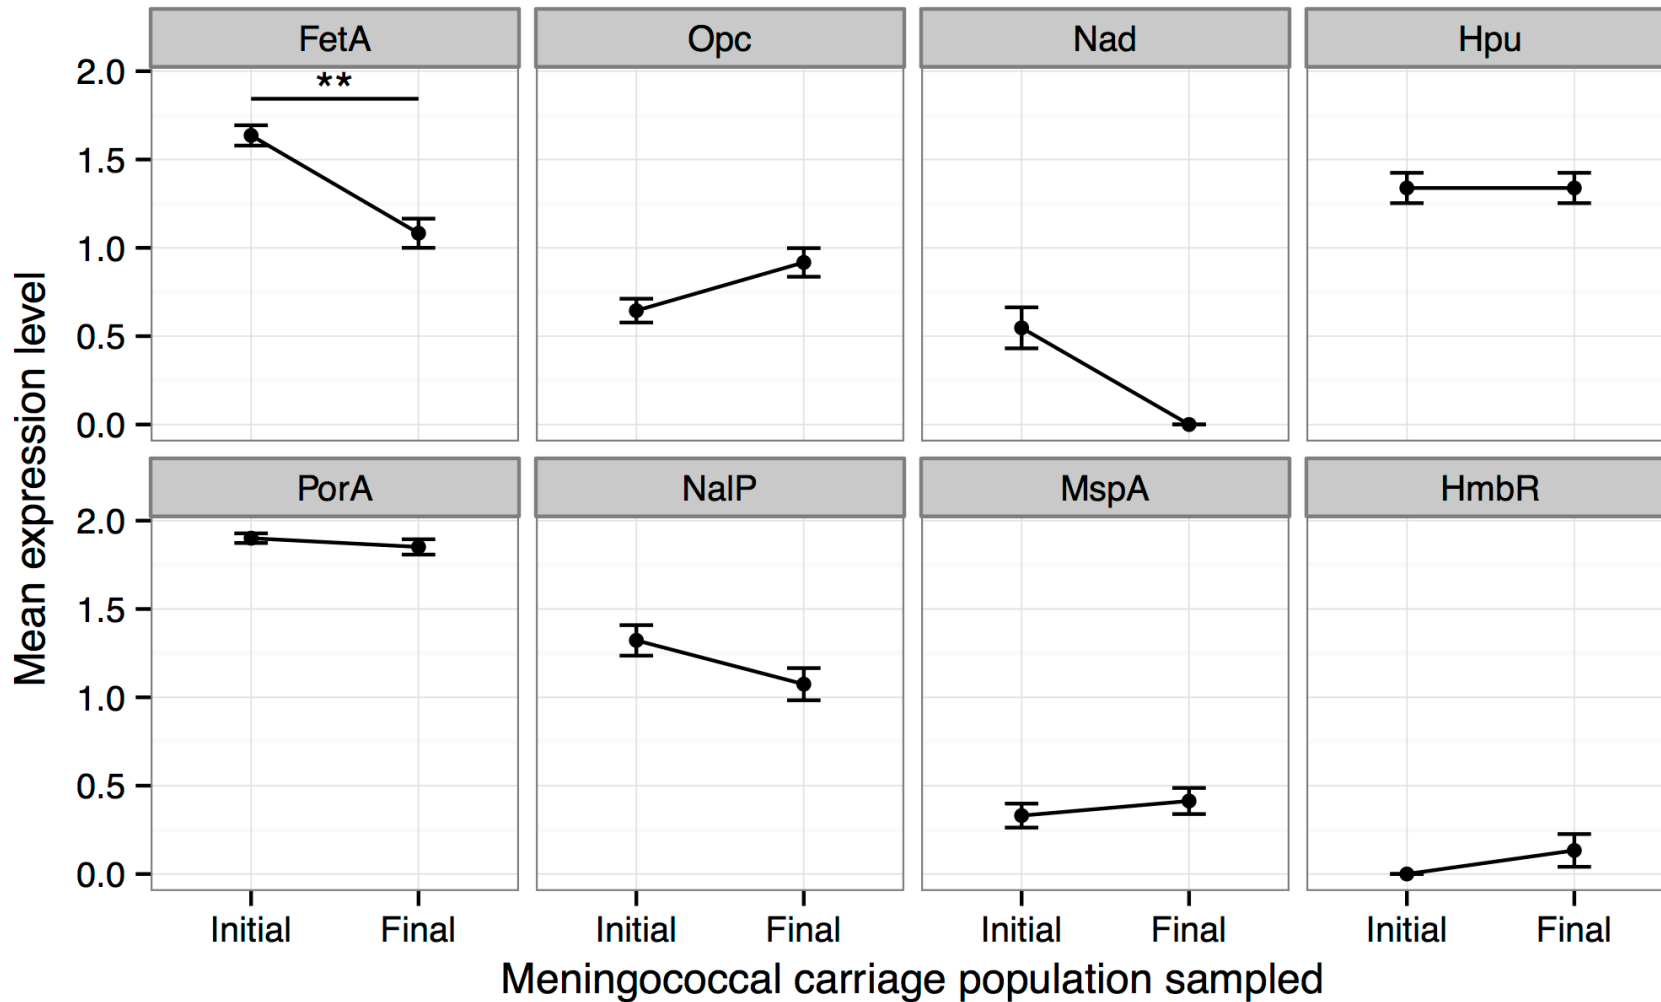

Figure A9. Changes in the mean expression scores of individual genes. Graphs show the changes in mean expression score for each phase variable gene. The mean expression was determined from the expression scores of up to six isolates per time point. The change in mean expression score was calculated between the initial and final time points when carriage was detected. The significance of these changes was determined by analysis in a Wilcoxon rank signed test with continuity correction (\*\*,  $P > 0.01$ ).

Table A1. Oligonucleotide primers and antibodies

| Oligonucleotide Name                                 | Oligonucleotide Sequence     | Primer Use                                               |
|------------------------------------------------------|------------------------------|----------------------------------------------------------|
| Primers for Typing of PorA and FetA Variable Regions |                              |                                                          |
| PorAVR2T10-1 REV                                     | CGGAACGAGAGTAGGCGGCT         | For amplification from a PorA VR2 with a 10-1 type       |
| PorAVR215 REV                                        | CATCAGCATTGTTCTGCCTAG        | For amplification from a PorA VR2 with a 15 type         |
| fetA 1-7 for                                         | AGATGCAACTGATGAAGAGA         | For amplification from a FetA VR with a 1-7 type         |
| fetA 3-7 for                                         | ACGGCGAATTCTCCATCCCGA        | For amplification from a FetA VR with a 3-7 type         |
| fetA 1-3 for                                         | AGCTAGTGCATCCGCGACAG         | For amplification from a FetA VR with a 1-3 type         |
| fetA 4-1 for                                         | GAAGTCGACGTAGATGATGCAC       | For amplification from a FetA VR with a 4-1 type         |
| fetA 5-1 for                                         | CGGCGAATTTGAGATCTCCGG        | For amplification from a FetA VR with a 5-1 type         |
| Primers for SSR repeat tract analysis                |                              |                                                          |
| FetApro-for2                                         | TTACATTTCCGACAAAACCT         | For amplification and sequencing or GeneScan of FetA SSR |
| FetApro-rev                                          | AGAGTTCGCGCATATCGGTT         |                                                          |
| FetApro-rev-FAM                                      | (FAM)AGAGTTCGCGCATATCGGTT    |                                                          |
| Opc-for-FAM                                          | (FAM)GAGAATAACAATTCGTTGTA    | Used with opc-revS for amplification of opc SSR          |
| NadA-for-FAM                                         | (FAM)TCGACGTCCTCGATTACGAAGGC | Used with nadA-rev for amplification of nadA SSR         |

| PilE primers        |                                                         |                                                                   |
|---------------------|---------------------------------------------------------|-------------------------------------------------------------------|
| pilE-B              | TAATCCGAGTGGCCGTGGAA                                    | Primers for amplification and sequencing of <i>pilE</i> gene      |
| pilE-B-rev          | TAATACACAGGTATCGCAAC                                    |                                                                   |
| Primers for RT qPCR |                                                         |                                                                   |
| Gdh350F             | 5'-TCGCCATTAAGCCGAAATC                                  | Primers for quantitative RT PCR of the <i>porA</i> phase variants |
| Gdh417R             | 5'-CTTGCCGGTACGCAGGTAGA                                 |                                                                   |
| Gdh374T             | 5'-6JOE-ACGAACGCTGGAAGGGCGTTC-BBQ                       |                                                                   |
| PorA984F            | 5'-ACCGATCCCTTGAAAAACCAT                                |                                                                   |
| PorA1050R           | 5'-ATTCAAGCCGCCTTCCTCAT                                 |                                                                   |
| PorA1006T           | 5'-Cy5-AGGTACACCGCCTGACGGGCG-BBQ                        |                                                                   |
| Antibody Name       | Antibody Target and Type                                | Source                                                            |
| Anti-RecA           | <i>E. coli</i> RecA, mouse polyclonal antisera          | Sigma                                                             |
| Anti-fHBP           | Variant 1 of Nm fHBP, mouse polyclonal antisera         | Christopher Tang, personal comm.                                  |
| Anti-F1-3 FetA      | Variant F1-3 of Nm FetA, mouse polyclonal antisera      | Ian Feavers, personal comm.                                       |
| Anti-F1-5 FetA      | Variant F1-5 of Nm FetA, mouse polyclonal antisera      | Ian Feavers, personal comm.                                       |
| Anti-F5-5 FetA      | Variant F5-5 of Nm FetA, mouse polyclonal antisera      | Ian Feavers, personal comm.                                       |
| Anti-NadA           | Nm strain MC58 NadA, mouse polyclonal antisera          | Ian Feavers, personal comm.                                       |
| Anti-HpuA-8047      | Nm strain 8047 HpuA, mouse polyclonal antisera          | Chris Bayliss, personal comm.                                     |
| P1.16 (MN5C11G)     | Serosubtype P1.16 of Nm PorA, mouse monoclonal antibody | NIBSC, Poolman <i>et al.</i> <sup>1</sup>                         |
| P1.5 (MN22A9.19)    | Serosubtype P1.5 of Nm PorA, mouse monoclonal antibody  | NIBSC, Poolman <i>et al.</i> <sup>1</sup>                         |
| B306                | Nm Opc, mouse monoclonal antibody                       | Mumthaz Virji, personal                                           |

|  |  |       |
|--|--|-------|
|  |  | comm. |
|--|--|-------|

<sup>1</sup>Poolman *et al.* (1995) Clin. Diagn. Lab. Immunol. 2: 69-72.

Table A2. Repeat Tract Data for Carriage Isolates for Genes – FetA, PorA, Opc and NadA.

| Volunteer<br>/time pt | Isolate | Phase Variable Gene |                    |                            |                   |                    |                            |                     |                    |                            |                   |                    |                            |   |
|-----------------------|---------|---------------------|--------------------|----------------------------|-------------------|--------------------|----------------------------|---------------------|--------------------|----------------------------|-------------------|--------------------|----------------------------|---|
|                       |         | <i>fetA</i>         |                    |                            | <i>porA</i>       |                    |                            | <i>opc</i>          |                    |                            | <i>nadA</i>       |                    |                            |   |
|                       |         | Size <sup>1</sup>   | Tract <sup>2</sup> | Exp.<br>State <sup>3</sup> | Size <sup>1</sup> | Tract <sup>2</sup> | Exp.<br>State <sup>3</sup> | Size <sup>1,4</sup> | Tract <sup>2</sup> | Exp.<br>State <sup>3</sup> | Size <sup>1</sup> | Tract <sup>2</sup> | Exp.<br>State <sup>3</sup> |   |
| cc174                 | V43/1st | N43.1.1             | 382.7              | 10C*                       | 2                 | 317.8              | 12G                        | 2                   | 247.2              | 11C*                       | 1                 | 395.9              | 12TAAA                     | 0 |
|                       |         | N43.1.2             | 381.7              | 9C*                        | 2                 | 317.8              | 12G                        | 2                   | 247.1              | 11C                        | 1                 | 395.7              | 12TAAA                     | 0 |
|                       |         | N43.1.3             | 381.8              | 9C                         | 2                 | 317.8>316.7(1.2)   | 12G*                       | 2                   | 246.7              | 11C                        | 1                 | 396.0              | 12TAAA                     | 0 |
|                       |         | N43.1.4             | 381.8              | 9C                         | 2                 | 317.8              | 12G                        | 2                   | 246.7              | 11                         | 1                 | 396.9              | 12TAAA                     | 0 |
|                       |         | N43.1.5             | 381.6              | 9C                         | 2                 | 317.8              | 12G                        | 2                   | 246.9              | 11C                        | 1                 | 396.0              | 12TAAA                     | 0 |
|                       |         | N43.1.6             | 381.8              | 9C                         | 2                 | 317.9              | 12G                        | 2                   | 247.0              | 11C                        | 1                 | 395.7              | 12TAAA                     | 0 |
|                       |         | N43.1.7             | 381.7              | 9C                         | 2                 | 317.8              | 12G                        | 2                   | 246.7              | 11C                        | 1                 | 396.1              | 12TAAA                     | 0 |
|                       |         | N43.1.8             | 381.7              | 9C                         | 2                 | 317.8              | 12G                        | 2                   |                    |                            |                   | 395.8              | 12TAAA                     | 0 |
|                       |         | N43.1.9             | 381.6              | 9C                         | 2                 | 317.8              | 12G                        | 2                   | 246.7              | 11C                        | 1                 | 396.0              | 12TAAA                     | 0 |
|                       |         | N43.1.10            | 382.7              | 10C                        | 2                 | 317.8              | 12G                        | 2                   | 247.1              | 11C                        | 1                 | 395.7              | 12TAAA                     | 0 |
|                       |         | N43.1.11            | 381.6              | 9C                         | 2                 | 317.8              | 12G                        | 2                   | 246.7              | 11C                        | 1                 | 397.0              | 12TAAA                     | 0 |
|                       |         | N43.1.12            | 381.6              | 9C                         | 2                 | 318.0              | 12G                        | 2                   | 247.3              | 11C                        | 1                 | 395.6              | 12TAAA                     | 0 |
|                       |         | N43.2               | 381.7              | 9C                         | 2                 | 318.0              | 12G                        | 2                   | 247.1              | 11C                        | 1                 | 395.7              | 12TAAA                     | 0 |
|                       |         | N43.3               | 381.7              | 9C                         | 2                 | 317.8>316.8(1.2)   | 12G                        | 2                   | 247.0              | 11C                        | 1                 | 395.9              | 12TAAA                     | 0 |
|                       |         | N43.4               | 381.7              | 9C                         | 2                 | 318.0              | 12G                        | 2                   | 247.1              | 11C                        | 1                 | 395.8              | 12TAAA                     | 0 |
|                       |         | N43.5               |                    |                            |                   | 317.8              | 12G                        | 2                   | 246.7              | 11C                        | 1                 | 396.0              | 12TAAA                     | 0 |
|                       |         | N43.6               | 381.8              | 9C                         | 2                 | 317.7              | 12G                        | 2                   | 246.5              | 11C                        | 1                 |                    |                            |   |
|                       |         | N43.7               | 381.7              | 9C                         | 2                 | 317.8              | 12G                        | 2                   | 247.0              | 11C                        | 1                 | 396.1              | 12TAAA                     | 0 |
|                       |         | N43.8               | 381.7              | 9C                         | 2                 | 317.8              | 12G                        | 2                   | 246.6              | 11C                        | 1                 |                    |                            |   |
|                       | N43.9   |                     |                    |                            | 317.8             | 12G                | 2                          | 246.6               | 11C                | 1                          | 396.1             | 12TAAA             | 0                          |   |
| V43/2nd               | N241.1  | 381.7               | 9C                 | 2                          | 317.8             | 12G                | 2                          | 244.7/242.5         | 9C                 | 0                          | 397.0             | 12TAAA             | 0                          |   |
|                       | N241.2  | 381.7               | 9C                 | 2                          | 317.8             | 12G                | 2                          | 242.5               | 9C                 | 0                          | 396.8             | 12TAAA             | 0                          |   |
| V43/3rd               | N349.1  | 381.6               | 9C*                | 2                          | 317.7             | 12G                | 2                          | 244.6               | 9C*                | 0                          | 396.9             | 12TAAA             | 0                          |   |
|                       |         | N349.2              | 381.8              | 9C                         | 2                 | 317.8              | 12G                        | 2                   | 244.8              | 9C                         | 0                 | 396.0              | 12TAAA                     | 0 |
|                       |         | N349.3              | 381.7              | 9C                         | 2                 | 317.7              | 12G                        | 2                   | 245.0              | 9C                         | 0                 | 395.7              | 12TAAA                     | 0 |
|                       |         | N349.4              | 381.7              | 9C                         | 2                 | 317.8              | 12G                        | 2                   | 244.7              | 9C                         | 0                 | 396.0              | 12TAAA                     | 0 |
|                       |         | N349.5              | 381.6              | 9C                         | 2                 | 317.8              | 12G                        | 2                   | 245.0              | 9C                         | 0                 | 395.7              | 12TAAA                     | 0 |
|                       |         | N349.6              | 381.6              | 9C                         | 2                 | 317.8              | 12G                        | 2                   | 244.7              | 9C                         | 0                 | 396.0              | 12TAAA                     | 0 |
|                       |         | N349.7              |                    |                            |                   | 317.7              | 12G                        | 2                   |                    |                            |                   | 397.0              | 12TAAA                     | 0 |
|                       |         | N349.8              |                    |                            |                   | 316.7              | 11G                        | 2                   | 244.6              | 9C                         | 0                 | 396.1              | 12TAAA                     | 0 |
|                       |         | N349.9              | 381.6              | 9C                         | 2                 | 317.8              | 12G                        | 2                   | 245.0              | 9C                         | 0                 | 395.7              | 12TAAA                     | 0 |
|                       |         | N349.10             | 381.7              | 9C                         | 2                 | 317.8              | 12G                        | 2                   | 245.4              | 9C                         | 0                 | 396.0              | 12TAAA                     | 0 |
|                       |         | N349.11             | 381.7              | 9C                         | 2                 | 319.0=317.9(1.0)   | 13G                        | 2                   | 247.7              | 12C                        | 2                 | 397.0              | 12TAAA                     | 0 |



|         |         |         |      |   |                  |      |   |             |     |   |       |         |   |
|---------|---------|---------|------|---|------------------|------|---|-------------|-----|---|-------|---------|---|
|         | N349.12 |         |      |   | 317.8            | 12G  | 2 | 246.3       | 10C | 0 | 395.9 | 12TAAA  | 0 |
|         | N349.13 | 381.8   | 9C   | 2 | 318.0            | 12G  | 2 | 245.3       | 9C  | 0 | 395.7 | 12TAAA  | 0 |
|         | N349.14 | 381.7   | 9C   | 2 | 317.7            | 12G  | 2 | 244.9       | 9C  | 0 | 395.9 | 12TAAA  | 0 |
|         | N349.15 | 381.7   | 9C   | 2 | 317.9            | 12G  | 2 | 245.1       | 9C  | 0 | 395.7 | 12TAAA  | 0 |
|         | N349.16 | 380.7   | 8C   | 0 | 318.8            | 13G  | 2 | 247.8       | 12C | 2 | 396.0 | 12TAAA  | 0 |
|         | N349.17 |         |      |   | 316.7            | 11G  | 2 | 245.0       | 9C  | 0 | 395.7 | 12TAAA  | 0 |
|         | N349.18 |         |      |   | 317.7            | 12G  | 2 | 244.8       | 9C  | 0 | 395.9 | 12TAAA  | 0 |
|         | N349.19 |         |      |   | 318.0            | 12G  | 2 | 245.1       | 9C  | 0 | 395.7 | 12TAAA  | 0 |
|         | N349.20 |         |      |   | 317.8            | 12G  | 2 | 244.8       | 9C  | 0 | 396.0 | 12TAAA  | 0 |
| V43/4th | Cleared |         |      |   |                  |      |   |             |     |   |       |         |   |
|         |         |         |      |   |                  |      |   |             |     |   |       |         |   |
| V51/1st | N51.1   | 381.6   | 9C   | 2 | 317.9            | 12G* | 2 | 244.9       | 9C  | 0 | 395.8 | 12TAAA  | 0 |
|         | N51.2   | 381.7   | 9C   | 2 | 317.9            | 12G  | 2 | 242.6       | 9C  | 0 | 396.8 | 12TAAA  | 0 |
|         | N51.3   | 381.7   | 9C   | 2 | 317.9            | 12G  | 2 | 242.6       | 9C  | 0 | 396.6 | 12TAAA  | 0 |
|         | N51.4   | 381.6   | 9C   | 2 | 317.9>316.8(1.1) | 12G  | 2 | 242.6       | 9C  | 0 | 396.9 | 12TAAA  | 0 |
|         | N51.5   | 381.7   | 9C   | 2 | 317.8>316.8(1.2) | 12G  | 2 | 242.6       | 9C  | 0 | 396.6 | 12TAAA  | 0 |
|         | N51.6   |         |      |   | 317.9            | 12G  | 2 |             |     |   | 396.9 | 12TAAA  | 0 |
| V51/2nd | N236.1  | 382.5   | 10C* | 2 | 317.9            | 12G  | 2 | 242.5/244.6 | 9C  | 0 | 396.6 | 12TAAA* | 0 |
|         | N236.2  | 382.7   | 10C  | 2 | 317.9            | 12G  | 2 | 242.5       | 9C  | 0 | 396.9 | 12TAAA  | 0 |
|         | N236.3  | 381.7   | 9C   | 2 | 317.9            | 12G  | 2 | 241.8       | 9C* | 0 | 397.0 | 12TAAA  | 0 |
|         | N236.4  | 381.6   | 9C   | 2 | 317.8            | 12G  | 2 | 242.4       | 9C  | 0 | 396.9 | 12TAAA  | 0 |
|         | N236.5  | 381.6   | 9C   | 2 | 317.8            | 12G  | 2 | 242.5       | 9C  | 0 | 396.9 | 12TAAA  | 0 |
|         | N236.6  | 381.6   | 9C   | 2 | 317.8            | 12G  | 2 | 242.4       | 9C  | 0 | 396.6 | 12TAAA  | 0 |
| V51/3rd | N354.1  | 383.5?? | 10C* | 2 | 317.0>316.0(1.1) | 11G* | 2 | 244.5/242.4 | 9C* | 0 | 397.0 | 12TAAA  | 0 |
|         | N354.2  | 383.7   | 11C* | 1 | 316.9            | 11G  | 2 | 242.5       | 9C  | 0 | 396.9 | 12TAAA  | 0 |
|         | N354.3  | 383.7   | 11C  | 1 | 316.8            | 11G  | 2 | 242.5       | 9C  | 0 | 396.9 | 12TAAA  | 0 |
|         | N354.4  | 383.6   | 11C  | 1 | 316.8            | 11G  | 2 | 242.6       | 9C  | 0 | 396.7 | 12TAAA  | 0 |
|         | N354.5  | 381.6   | 9C   | 2 | 317.8            | 12G  | 2 | 242.4       | 9C  | 0 | 396.8 | 12TAAA  | 0 |
|         | N354.6  | 383.6   | 11C  | 1 | 316.8            | 11G  | 2 | 242.5       | 9C  | 0 | 396.8 | 12TAAA  | 0 |
| V51/4th | N424.1  | 380.6   | 8C   | 0 | 317.0            | 11G  | 2 | 242.4       | 9C  | 0 | 396.8 | 12TAAA  | 0 |
|         | N424.2  | 380.8   | 8C   | 0 | 316.8            | 11G  | 2 | 242.4       | 9C  | 0 | 396.8 | 12TAAA  | 0 |
|         | N424.3  | 380.7   | 8C   | 0 | 316.9            | 11G  | 2 | 242.5       | 9C  | 0 | 396.8 | 12TAAA  | 0 |
|         | N424.4  | 380.6   | 8C   | 0 | 316.8            | 11G  | 2 | 242.4       | 9C  | 0 | 396.8 | 12TAAA  | 0 |
|         | N424.5  | 380.6   | 8C   | 0 | 316.8            | 11G  | 2 | 242.5       | 9C  | 0 | 396.8 | 12TAAA  | 0 |
|         | N424.6  | 380.6   | 8C   | 0 | 316.7            | 11G  | 2 | 242.4       | 9C  | 0 | 396.9 | 12TAAA  | 0 |
|         |         |         |      |   |                  |      |   |             |     |   |       |         |   |
| V52/1st | N52.1   | 381.6   | 9C   | 2 | 318              | 12G  | 2 | 242.6       | 9C  | 0 | 396.6 | 12TAAA  | 0 |
|         | N52.2   | 381.7   | 9C   | 2 | 317.8            | 12G* | 2 | 242.6       | 9C  | 0 | 396.9 | 12TAAA  | 0 |
|         | N52.3   | 381.7   | 9C   | 2 | 317.9            | 12G  | 2 | 242.8       | 9C  | 0 | 396.6 | 12TAAA  | 0 |
|         | N52.4   | 381.7   | 9C   | 2 | 317.8>316.8(1.2) | 12G  | 2 | 242.5       | 9C  | 0 | 396.8 | 12TAAA  | 0 |

|         |          |       |      |    |                  |            |    |               |      |    |                  |               |    |
|---------|----------|-------|------|----|------------------|------------|----|---------------|------|----|------------------|---------------|----|
|         | N52.5    | 381.7 | 9C   | 2  | 317.8>316.8(1.2) | 12G        | 2  | 243.2         | 9C   | 0  | 396.4            | 12TAAA        | 0  |
|         | N52.6    | 381.7 | 9C   | 2  | 317.9            | 12G        | 2  | 242.6         | 9C   | 0  | 396.7            | 12TAAA        | 0  |
| V52/2nd | N238.1   | 381.7 | 9C   | 2  | 316.8            | 11G        | 2  | 242.4         | 9C   | 0  | 396.9            | 12TAAA        | 0  |
|         | N238.2   | 381.7 | 9C   | 2  | 316.8            | 11G        | 2  | 242.5         | 9C   | 0  | 396.7            | 12TAAA        | 0  |
|         | N238.3   | 381.7 | 9C   | 2  | 319.0>317.9(1.1) | 13G*       | 2  | 242.5         | 9C   | 0  | 396.8            | 12TAAA        | 0  |
|         | N238.4   | 381.6 | 9C   | 2  | 316.7            | 11G        | 2  | 242.4         | 9C   | 0  | 404.6            | 14TAAA        | 2  |
|         | N238.5   | 381.6 | 9C   | 2  | 316.8            | 11G        | 2  | 242.7         | 9C   | 0  | 396.8            | 12TAAA        | 0  |
|         | N238.6   | 381.7 | 9C   | 2  | 317.9            | 12G        | 2  | 242.5         | 9C   | 0  | 396.9            | 12TAAA        | 0  |
| V52/3rd | N342.1   | 380.6 | 8C   | 0  | 317.8            | 12G        | 2  | 242.5         | 9C   | 0  | 396.9            | 12TAAA        | 0  |
| V52/4th | Cleared  |       |      |    |                  |            |    |               |      |    |                  |               |    |
|         |          |       |      |    |                  |            |    |               |      |    |                  |               |    |
| V54/1st | N54.1.1  | 381.8 | 9C   | 2# | 320.2            | 14G*       | 1# | 247.1         | 11C  | 1# | 404.8            | 14TAAA*       | 2# |
|         | N54.1.2  | 381.7 | 9C   | 2  | 322.0>321.1(1.2) | 16G        | 0  | 246.9         | 11C  | 1  | 403.7/407.6(1.2) | 14TAAA>15TAAA | 2  |
|         | N54.1.3  | 381.7 | 9C   | 2  | 323.0>321.9(1.1) | 17G        | 0  | 247.0         | 11C  | 1  | 403.8            | 14TAAA        | 2  |
|         | N54.1.4  | 381.6 | 9C   | 2  | 320.0>319.0(1.1) | 14G        | 1  | 245.7         | 10C  | 0  | 403.7            | 14TAAA        | 2  |
|         | N54.1.5  |       |      |    | 319.8            | 14G        | 1  | 246.7         | 11C  | 1  | 403.8            | 14TAAA        | 2  |
|         | N54.1.6  | 381.8 | 9C   | 2  | 322.1>321.1(1.1) | 16G        | 0  | 247.3         | 11C  | 1  | 403.5            | 14TAAA        | 2  |
|         | N54.1.7  |       |      |    | 322.0>321.0(1.2) | 16G        | 0  | 246.9         | 11C  | 1  | 403.7            | 14TAAA        | 2  |
|         | N54.1.8  |       |      |    | 323.0>321.9(1.1) | 17G        | 0  | 247.1         | 11C  | 1  | 403.6            | 14TAAA        | 2  |
|         | N54.1.9  | 381.7 | 9C   | 2  | 319.9>318.8(1.0) | 14G        | 1  | 246.1         | 10C  | 0  | 403.9            | 14TAAA        | 2  |
|         | N54.1.10 | 381.8 | 9C   | 2  | 318.8>317.7(1.2) | 13G        | 2  | 246.7         | 11C  | 1  | 404.8            | 14TAAA        | 2  |
|         | N54.1.11 | 381.7 | 9C   | 2  | 319.8>320.9(1.0) | 15G        | 1? | 246.9         | 11C  | 1  | 403.9            | 14TAAA        | 2  |
|         | N54.1.12 | 381.8 | 9C   | 2  | 321.0>320.0(1.1) | 15G        | 1? | 246.5         | 11C  | 1  | 403.6            | 14TAAA        | 2  |
|         | N54.2    | 381.7 | 9C   | 2  | 320.9>319.9(1.1) | 15G        | 1? | 246.8         | 11C  | 1  | 403.7            | 14TAAA        | 2  |
|         | N54.3    | 381.7 | 9C   | 2  | 319.9>320.9(1.1) | 15G        | 1? | 247.1         | 11C  | 1  | 404.7            | 14TAAA        | 2  |
|         | N54.4    | 381.7 | 9C   | 2  | 321.1>320.0(1.1) | 15G        | 1? | 246.7         | 11C  | 1  | 403.6            | 14TAAA        | 2  |
|         | N54.5    | 381.8 | 9C   | 2  | 321.0>319.9(1.1) | 15G        | 1? | 247.1         | 11C  | 1  | 403.8            | 14TAAA        | 2  |
|         | N54.6    | 381.7 | 9C   | 2  | 320.8>319.8(1.1) | 15G        | 1? | 246.8         | 11C  | 1  | 403.6            | 14TAAA        | 2  |
|         | N54.7    | 381.7 | 9C   | 2  | 321.0=319.9(1.0) | 15G        | 1? | 247.4         | 11C  | 1  | 403.8            | 14TAAA        | 2  |
|         | N54.8    | 381.6 | 9C   | 2  | 321.0>319.9(1.2) | 15G        | 1? |               |      |    | 403.5            | 14TAAA        | 2  |
|         | N54.9    | 381.7 | 9C   | 2  | 321.0>320.0(1.1) | 15G        | 1? | 246.8         | 11C  | 1  | 403.8            | 14TAAA        | 2  |
| V54/2nd | N237.1   | 381.6 | 9C   | 2  | 323.3>322.3(1.1) | 17G        | 0  | 243.4 (245.8) | 10C  | 0  | 404.8            | 14TAAA*       | 2  |
|         | N237.2   | 381.7 | 9C   | 2  | 325.2=326.3(1.0) | 20G (19G*) | 0  | 243.4         | 10C  | 0  | 400.7            | 13TAAA*       | 2  |
|         | N237.3   | 381.7 | 9C   | 2  | 324.0>323.0(1.1) | 18G*       | 0  | 243.4         | 10C  | 0  | 404.8            | 14TAAA        | 2  |
|         | N237.4   | 382.5 | 10C* | 2  | 324.0>323.0(1.1) | 18G*       | 0  | 243.3         | 10C  | 0  | 396.9            | 12TAAA        | 0  |
|         | N237.5   | 381.6 | 9C   | 2  | 325.1>324.1(1.1) | 19G*       | 0  | 244.4         | 11C* | 1  | 404.6            | 14TAAA        | 2  |
|         | N237.6   | 381.7 | 9C   | 2  | 319.9>320.9(1.2) | 15G (14G*) | 1? | 244.5         | 11C* | 1  | 404.5            | 14TAAA        | 2  |
| V54/3rd | N343.1   | 380.6 | 8C   | 0  | 323.0=322.0(1.0) | 17G*       | 0  | 247.2         | 11C  | 1  | 397.0            | 12TAAA*       | 0  |

|         |          |       |    |    |                  |     |    |       |      |    |       |         |    |
|---------|----------|-------|----|----|------------------|-----|----|-------|------|----|-------|---------|----|
|         | N343.2   | 380.8 | 8C | 0# | 322.1>321.0(1.1) | 16G | 0# | 245.7 | 10C* | 0# | 396.8 | 12TAAA  | 0# |
|         | N343.3   | 380.7 | 8C | 0  | 321.0=322.0(1.0) | 16G | 0  | 246.0 | 10C  | 0  | 396.9 | 12TAAA  | 0  |
|         | N343.4   | 381.8 | 9C | 2  | 324.1>323.2(1.2) | 18G | 0  | 247.3 | 11C  | 1  | 395.8 | 12TAAA  | 0  |
|         | N343.5   | 380.7 | 8C | 0# | 326.1>325.1(1.1) | 20G | 0# | 247.8 | 12C  | 2# | 396.9 | 12TAAA  | 0# |
|         | N343.6   | 380.8 | 8C | 0  | 325.3>324.2(1.2) | 19G | 0  | 247.2 | 11C  | 1  | 395.7 | 12TAAA  | 0  |
|         | N343.7   | 380.7 | 8C | 0  | 321.9=322.9(1.0) | 17G | 0  | 245.7 | 10C  | 0  | 396.0 | 12TAAA  | 0  |
|         | N343.8   | 380.8 | 8C | 0  | 319.8=320.8(1.0) | 15G | 1? | 247.1 | 11C  | 1  | 396.7 | 12TAAA  | 0  |
|         | N343.9   | 380.6 | 8C | 0  | 324.0=325.0(1.0) | 19G | 0  | 246.8 | 11C  | 1  | 396.0 | 12TAAA  | 0  |
|         | N343.10  | 380.8 | 8C | 0  | 320.0.321.1(1.3) | 15G | 1? | 246.9 | 11C  | 1  | 396.9 | 12TAAA  | 0  |
|         | N343.11  | 380.7 | 8C | 0  | 322.9=321.9(1.0) | 17G | 0  | 246.6 | 11C  | 1  | 397.1 | 12TAAA  | 0  |
|         | N343.12  | 380.7 | 8C | 0  | 320.9=321.9(1.0) | 16G | 0  |       |      |    |       |         |    |
|         | N343.13  | 380.7 | 8C | 0  | 323.0>322.0(1.1) | 17G | 0  | 246.9 | 11C  | 1  | 397.1 | 12TAAA  | 0  |
|         | N343.14  | 380.7 | 8C | 0  | 322.0=323.0(1.0) | 17G | 0  | 247.0 | 11C  | 1  | 395.8 | 12TAAA  | 0  |
|         | N343.15  | 380.7 | 8C | 0  | 321.9=320.9(1.0) | 16G | 0  | 246.6 | 11C  | 1  | 396.1 | 12TAAA  | 0  |
|         | N343.16  | 380.8 | 8C | 0  | 322.2=321.2(1.0) | 17G | 0  | 246.5 | 11C  | 1  | 395.8 | 12TAAA  | 0  |
|         | N343.17  | 380.7 | 8C | 0  | 321.9=320.9(1.0) | 16G | 0  | 246.5 | 11C  | 1  | 396.0 | 12TAAA  | 0  |
|         | N343.18  | 380.9 | 8C | 0  | 322.1=321.1(1.0) | 16G | 0  | 245.5 | 10C  | 0  | 396.7 | 12TAAA  | 0  |
|         | N343.19  | 380.7 | 8C | 0  | 324.0>322.9(1.2) | 18G | 0  | 246.7 | 11C  | 1  | 397.0 | 12TAAA  | 0  |
|         | N343.20  | 380.8 | 8C | 0  | 321.1>320.1(1.2) | 15G | 1? | 247.1 | 11C  | 1  | 395.8 | 12TAAA  | 0  |
| V54/4th | Replaced |       |    |    |                  |     |    |       |      |    |       |         |    |
|         |          |       |    |    |                  |     |    |       |      |    |       |         |    |
| V58/1st | N58.1    | 381.6 | 9C | 2  | 317.0            | 11G | 2  | 242.3 | 9C   | 0  | 396.9 | 12TAAA  | 0  |
|         | N58.2    | 381.7 | 9C | 2  | 316.8            | 11G | 2  | 242.4 | 9C   | 0  | 396.9 | 12TAAA  | 0  |
|         | N58.3    | 381.6 | 9C | 2  | 317.8            | 12G | 2  | 242.0 | 9C*  | 0  | 396.6 | 12TAAA  | 0  |
|         | N58.4    | 381.7 | 9C | 2  | 316.9            | 11G | 2  | 242.5 | 9C   | 0  | 396.8 | 12TAAA  | 0  |
|         | N58.5    | 381.6 | 9C | 2  | 316.8            | 11G | 2  | 242.6 | 9C*  | 0  | 396.7 | 12TAAA  | 0  |
|         | N58.6    | 381.6 | 9C | 2  | 317.8            | 12G | 2  | 242.6 | 9C   | 0  | 397.0 | 12TAAA  | 0  |
| V58/2nd | N240.1   | 381.6 | 9C | 2  | 317.8            | 12G | 2  | 242.3 | 9C   | 0  | 396.8 | 12TAAA  | 0  |
|         | N240.2   | 381.6 | 9C | 2  | 317.7            | 12G | 2  | 242.5 | 9C   | 0  | 400.7 | 13TAAA  | 2  |
| V58/3rd | Cleared  |       |    |    |                  |     |    |       |      |    |       |         |    |
| V58/4th | N429.1   | 381.6 | 9C | 2  | 317.0            | 11G | 2  | 244.5 | 9C   | 0  | 395.8 | 12TAAA  | 0  |
|         | N429.2   | 381.7 | 9C | 2  | 316.9            | 11G | 2  | 241.6 | 8C   | 0  | 396.6 | 12TAAA  | 0  |
|         | N429.3   | 381.7 | 9C | 2  | 316.8            | 11G | 2  | 242.6 | 9C   | 0  | 396.7 | 12TAAA  | 0  |
|         | N429.4   | 381.6 | 9C | 2  | 316.8            | 11G | 2  | 242.6 | 9C   | 0  | 396.7 | 12TAAA  | 0  |
|         | N429.5   | 381.7 | 9C | 2  | 316.7            | 11G | 2  | 242.5 | 9C   | 0  | 396.9 | 12TAAA  | 0  |
|         | N429.6   | 381.5 | 9C | 2  | 316.7            | 11G | 2  | 242.7 | 9C*  | 0  | 396.6 | 12TAAA  | 0  |
|         |          |       |    |    |                  |     |    |       |      |    |       |         |    |
| V59/1st | N59.1    | 381.6 | 9C | 2  | 317.7            | 12G | 2  | 245.2 | 9C   | 0  | 400.8 | 13TAAA* | 2  |
|         | N59.2    | 381.6 | 9C | 2  | 317.8            | 12G | 2  | 244.8 | 9C   | 0  | 403.5 | 14TAAA  | 2  |

|         |         |       |     |    |                  |      |    |             |     |    |       |         |    |
|---------|---------|-------|-----|----|------------------|------|----|-------------|-----|----|-------|---------|----|
|         | N59.3   | 381.6 | 9C  | 2  | 317.7            | 12G  | 2  | 245.0       | 9C  | 0  | 400.6 | 13TAAA  | 2  |
|         | N59.4   | 382.6 | 10C | 2  | 318.0            | 12G  | 2  | 245.1       | 9C  | 0  | 400.9 | 13TAAA  | 2  |
|         | N59.5   | 381.6 | 9C  | 2  | 317.9            | 12G  | 2  | 244.7       | 9C  | 0  | 400.8 | 13TAAA  | 2  |
|         | N59.6   | 381.6 | 9C  | 2  | 317.8            | 12G  | 2  | 244.5       | 9C  | 0  | 401.0 | 13TAAA  | 2  |
|         | N59.7   | 381.7 | 9C  | 2  | 317.9            | 12G  | 2  | 244.9       | 9C  | 0  | 400.7 | 13TAAA  | 2  |
|         | N59.8   |       |     |    | 317.8            | 12G  | 2  | 244.6       | 9C  | 0  | 400.9 | 13TAAA  | 2  |
|         | N59.9   |       |     |    | 317.7            | 12G  | 2  | 245.0       | 9C  | 0  | 397.0 | 12TAAA  | 0  |
|         | N59.10  |       |     |    | 317.8            | 12G  | 2  | 244.7       | 9C  | 0  | 399.8 | 13TAAA  | 2  |
|         | N59.11  |       |     |    | 317.8            | 12G  | 2  | 245.0       | 9G  | 0  | 400.7 | 13TAAA  | 2  |
|         | N59.12  | 381.8 | 9C  | 2  | 317.8            | 12G  | 2  | 244.6       | 9C  | 0  | 400.9 | 13TAAA  | 2  |
|         | N59.13  |       |     |    | 318.0            | 12G  | 2  | 245.0       | 9C  | 0  | 400.6 | 13TAAA  | 2  |
|         | N59.14  |       |     |    | 317.7            | 12G  | 2  | 244.8       | 9C  | 0  | 400.8 | 13TAAA  | 2  |
|         | N59.15  | 381.6 | 9C  | 2  | 317.9            | 12G  | 2  | 245.0       | 9C  | 0  | 400.6 | 13TAAA  | 2  |
|         | N59.16  | 381.7 | 9C  | 2  | 317.7            | 12G  | 2  | 244.8       | 9C  | 0  | 400.8 | 13TAAA  | 2  |
|         | N59.17  | 381.6 | 9C  | 2  | 317.9            | 12G  | 2  | 244.7       | 9C  | 0  | 400.7 | 13TAAA  | 2  |
|         | N59.18  |       |     |    | 317.8            | 12G  | 2  | 244.5       | 9C  | 0  | 401.0 | 13TAAA  | 2  |
|         | N59.19  | 381.7 | 9C  | 2  | 317.9            | 12G  | 2  | 244.8       | 9C  | 0  | 400.7 | 13TAAA  | 2  |
|         | N59.20  |       |     |    | 317.7            | 12G  | 2  | 244.6       | 9C  | 0  | 397.1 | 12TAAA  | 0  |
| V59/2nd | N253.1  | 381.6 | 9C  | 2  | 318.0=317.0(1.0) | 12G* | 2  | 244.5/242.5 | 9C  | 0  | 396.9 | 12TAAA  | 0  |
|         | N253.2  | 381.7 | 9C  | 2  | 317.9            | 12G  | 2  | 242.7       | 9C  | 0  | 396.6 | 12TAAA  | 0  |
|         | N253.3  | 381.7 | 9C  | 2  | 317.9            | 12G  | 2  | 242.6       | 9C  | 0  | 396.8 | 12TAAA  | 0  |
|         | N253.4  | 381.6 | 9C  | 2  | 317.8            | 12G  | 2  | 242.7       | 9C  | 0  | 396.4 | 12TAAA  | 0  |
|         | N253.5  | 381.5 | 9C  | 2  | 317.8            | 12G  | 2  | 242.5       | 9C  | 0  | 396.8 | 12TAAA  | 0  |
|         | N253.6  | 381.6 | 9C  | 2  | 317.7            | 12G  | 2  | 242.6       | 9C  | 0  | 396.6 | 12TAAA  | 0  |
| V59/3rd | N352.1  | 382.7 | 10C | 2  | 318.0            | 12G* | 2  | 244.6       | 9C  | 0  | 396.9 | 12TAAA* | 0  |
|         | N352.2  | 381.7 | 9C  | 2  | 317.8            | 12G  | 2  | 244.7       | 9C  | 0  | 396.9 | 12TAAA  | 0  |
|         | N352.3  | 383.5 | 11C | 1# | 317.8            | 12G  | 2# | 244.7       | 9C  | 0# | 400.8 | 13TAAA  | 2# |
|         | N352.4  | 382.5 | 10C | 2  | 317.9            | 12G  | 2  | 245.1       | 9C  | 0  | 400.6 | 13TAAA  | 2  |
|         | N352.5  | 383.6 | 11C | 1  | 317.8            | 12G  | 2  | 244.6       | 9C  | 0  | 401.0 | 13TAAA  | 2  |
|         | N352.6  | 383.5 | 11C | 1  | 316.8            | 11G  | 2  | 245.1       | 9C  | 0  | 400.6 | 13TAAA  | 2  |
|         | N352.7  |       |     |    | 318.8            | 13G  | 2  | 244.6       | 9C  | 0  | 393.3 | 11TAAA  | 1  |
|         | N352.8  |       |     |    | 318.1            | 12G  | 2  | 245.4       | 9C? | 0  | 400.6 | 13TAAA  | 2  |
|         | N352.9  |       |     |    | 317.9            | 12G  | 2  | 244.7       | 9C  | 0  | 397.0 | 12TAAA  | 0  |
|         | N352.10 |       |     |    | 317.8            | 12G  | 2  | 245.1       | 9C  | 0  | 392.9 | 11TAAA  | 1  |
|         | N352.11 | 384.6 | 12C | 0  | 317.8            | 12G  | 2  | 244.7       | 9C  | 0  | 400.8 | 13TAAA  | 2  |
|         | N352.12 |       |     |    | 317.9            | 12G  | 2  | 245.0       | 9C  | 0  | 396.7 | 12TAAA  | 0  |
|         | N352.13 |       |     |    | 317.8            | 12G  | 2  | 244.5       | 9C  | 0  | 400.9 | 13TAAA  | 2  |
|         | N352.14 |       |     |    | 317.7            | 12G  | 2  | 244.9       | 9C  | 0  | 396.7 | 12TAAA  | 0  |
|         | N352.15 |       |     |    | 317.8            | 12G  | 2  | 244.5       | 9C  | 0  | 401.0 | 13TAAA  | 2  |
|         | N352.16 | 383.7 | 11C | 1  | 317.9            | 12G  | 2  | 245.0       | 9C  | 0  | 396.7 | 12TAAA  | 0  |

|         |          |       |      |    |                   |     |    |             |     |    |       |        |    |
|---------|----------|-------|------|----|-------------------|-----|----|-------------|-----|----|-------|--------|----|
|         | N352.17  |       |      |    | 317.8             | 12G | 2  | 244.5       | 9C  | 0  | 397.1 | 12TAAA | 0  |
|         | N352.18  |       |      |    | 318.0             | 12G | 2  | 245.1       | 9C  | 0  | 400.6 | 13TAAA | 2  |
|         | N352.19  |       |      |    | 317.7             | 12G | 2  | 244.6       | 9C  | 0  | 397.1 | 12TAAA | 0  |
|         | N352.20  |       |      |    | 318.0             | 12G | 2  | 245.2       | 9C  | 0  | 400.5 | 13TAAA | 2  |
| V59/4th | N438.1   | 382.5 | 10C  | 2  | 317.0=318.0 (1.0) | 12G | 2  | 244.7/242.6 | 9C  | 0  | 396.9 | 12TAAA | 0  |
|         | N438.2   | 382.6 | 10C  | 2  | 317.9             | 12G | 2  | 242.4       | 9C* | 0  | 397.0 | 12TAAA | 0  |
|         | N438.3   | 384.7 | 12C  | 0# | 316.8             | 11G | 2# | 243.3       | 10C | 0# | 396.9 | 12TAAA | 0# |
|         | N438.4   | 383.7 | 11C  | 1  | 317.8             | 12G | 2  | 242.5       | 9C  | 0  | 396.8 | 12TAAA | 0  |
|         | N438.5   | 382.7 | 10C  | 2  | 317.8             | 12G | 2  | 242.6       | 9C  | 0  | 396.6 | 12TAAA | 0  |
|         | N438.6   | 383.5 | 11C* | 1  | 317.8             | 12G | 2  | 242.5       | 9C  | 0  | 396.9 | 12TAAA | 0  |
|         |          |       |      |    |                   |     |    |             |     |    |       |        |    |
| V88/1st | N88.1.1  | 381.7 | 9C   | 2  | 316.7             | 11G | 2  | 244.7       | 9C  | 0  | 393.2 | 11TAAA | 1  |
|         | N88.1.2  | 381.8 | 9C   | 2  | 316.7             | 11G | 2  | 244.7       | 9C  | 0  | 393.2 | 11TAAA | 1  |
|         | N88.1.3  | 381.8 | 9C   | 2  | 316.8             | 11G | 2  | 244.7       | 9C  | 0  | 393.1 | 11TAAA | 1  |
|         | N88.1.4  | 381.8 | 9C   | 2  |                   |     |    | 244.8       | 9C  | 0  |       |        |    |
|         | N88.1.5  | 381.7 | 9C   | 2  | 316.7             | 11G | 2  | 244.5       | 9C  | 0  | 393.3 | 11TAAA | 1  |
|         | N88.1.6  | 381.8 | 9C   | 2  | 316.9             | 11G | 2  | 245.0       | 9C  | 0  | 393.0 | 11TAAA | 1  |
|         | N88.1.7  | 381.7 | 9C   | 2  | 316.8             | 11G | 2  | 244.6       | 9C  | 0  | 393.3 | 11TAAA | 1  |
|         | N88.1.8  | 381.7 | 9C   | 2  | 316.7             | 11G | 2  | 245.1       | 9C  | 0  | 392.9 | 11TAAA | 1  |
|         | N88.1.9  | 381.8 | 9C   | 2  | 316.7             | 11G | 2  | 244.7       | 9C  | 0  | 393.2 | 11TAAA | 1  |
|         | N88.1.10 | 381.8 | 9C   | 2  | 316.8             | 11G | 2  | 245.2       | 9C  | 0  | 392.9 | 11TAAA | 1  |
|         | N88.2    | 381.8 | 9C   | 2  | 317.0             | 11G | 2  | 245.0       | 9C  | 0  | 392.9 | 11TAAA | 1  |
|         | N88.3    | 381.7 | 9C   | 2  | 316.7             | 11G | 2  | 244.7       | 9C  | 0  | 393.2 | 11TAAA | 1  |
|         | N88.4    | 381.7 | 9C   | 2  | 317.0             | 11G | 2  | 245.4       | 9C? | 0  | 392.8 | 11TAAA | 1  |
|         | N88.5    | 381.7 | 9C   | 2  | 316.8             | 11G | 2  | 244.8       | 9C  | 0  | 393.2 | 11TAAA | 1  |
|         | N88.6    | 381.8 | 9C   | 2  | 317.0             | 11G | 2  | 244.8       | 9C  | 0  | 393.1 | 11TAAA | 1  |
|         | N88.7    |       |      |    | 317.0             | 11G | 2  | 245.0       | 9C  | 0  | 393.3 | 11TAAA | 1  |
|         | N88.8    | 381.8 | 9C   | 2  |                   |     |    | 245.0       | 9C  | 0  |       |        |    |
|         | N88.9    | 381.8 | 9C   | 2  | 316.9             | 11G | 2  | 245.1       | 9C  | 0  | 393.3 | 11TAAA | 1  |
| V88/2nd | N272.1   | 381.5 | 9C   | 2  | 317.0>316.0 (1.2) | 11G | 2  | 244.7/242.6 | 9C  | 0  | 385.5 | 9TAAA  | 0  |
|         | N272.2   | 381.7 | 9C   | 2  | 316.8             | 11G | 2  | 242.5       | 9C  | 0  | 385.3 | 9TAAA  | 0  |
|         | N272.3   | 381.7 | 9C   | 2  | 316.8             | 11G | 2  | 242.7       | 9C  | 0  | 385.4 | 9TAAA  | 0  |
|         | N272.4   | 381.6 | 9C   | 2  | 316.8             | 11G | 2  | 242.5       | 9C  | 0  | 385.6 | 9TAAA  | 0  |
|         | N272.5   | 381.7 | 9C   | 2  | 316.8             | 11G | 2  | 242.7       | 9C  | 0  | 385.3 | 9TAAA  | 0  |
|         | N272.6   | 381.6 | 9C   | 2  | 316.8             | 11G | 2  | 242.6       | 9C  | 0  | 385.6 | 9TAAA  | 0  |
| V88/3rd | N369.1   | 382.6 | 10C  | 2# | 316.7             | 11G | 2# | 244.7       | 9C  | 0# | 385.6 | 9TAAA  | 0# |
|         | N369.2   | 382.8 | 10C  | 2  | 316.7             | 11G | 2  | 245.0       | 9C  | 0  | 385.5 | 9TAAA  | 0  |
|         | N369.3   | 381.8 | 9C   | 2  | 316.9             | 11G | 2  | 245.1       | 9C  | 0  | 385.3 | 9TAAA  | 0  |
|         | N369.4   | 381.9 | 9C   | 2  | 316.8             | 11G | 2  | 244.7       | 9C  | 0  | 385.6 | 9TAAA  | 0  |
|         | N369.5   | 382.8 | 10C  | 2  | 316.9             | 11G | 2  | 245.1       | 9C  | 0  | 385.3 | 9TAAA  | 0  |

|          |         |                  |         |    |                   |      |    |             |        |    |       |        |   |
|----------|---------|------------------|---------|----|-------------------|------|----|-------------|--------|----|-------|--------|---|
|          | N369.6  | 382.6            | 10C     | 2  | 316.7             | 11G  | 2  | 244.6       | 9C     | 0  | 385.7 | 9TAAA  | 0 |
|          | N369.7  | 381.6            | 9C      | 2  | 316.9             | 11G  | 2  | 245.0       | 9C     | 0  | 385.4 | 9TAAA  | 0 |
|          | N369.8  | 381.7            | 9C      | 2  | 316.7             | 11G  | 2  | 244.7       | 9C     | 0  | 385.7 | 9TAAA  | 0 |
|          | N369.9  | 381.7            | 9C      | 2  | 316.9             | 11G  | 2  | 245.0       | 9C     | 0  | 385.4 | 9TAAA  | 0 |
|          | N369.10 | 382.7            | 10C     | 2  | 316.7             | 11G  | 2  | 244.5       | 9C     | 0  | 385.7 | 9TAAA  | 0 |
|          | N369.11 | 381.8            | 9C      | 2  | 317.0             | 11G  | 2  | 245.1       | 9C     | 0  | 385.3 | 9TAAA  | 0 |
|          | N369.12 | 382.8            | 10C     | 2  | 316.7             | 11G  | 2  | 244.5       | 9C     | 0  | 385.7 | 9TAAA  | 0 |
|          | N369.13 | 381.8            | 9C      | 2  | 317.0             | 11G  | 2  | 245.2       | 9C     | 0  | 385.2 | 9TAAA  | 0 |
|          | N369.14 | 381.7            | 9C      | 2  | 316.8             | 11G  | 2  | 244.7       | 9C     | 0  | 385.6 | 9TAAA  | 0 |
|          | N369.15 | 381.8            | 9C      | 2  | 316.9             | 11G  | 2  | 245.2       | 9C     | 0  | 385.3 | 9TAAA  | 0 |
|          | N369.16 | 382.7            | 10C     | 2  | 316.8             | 11G  | 2  | 244.8       | 9C     | 0  | 385.6 | 9TAAA  | 0 |
|          | N369.17 | 381.8            | 9C      | 2  | 316.9             | 11G  | 2  | 244.5       | 9C     | 0  | 396.7 | 12TAAA | 0 |
|          | N369.18 | 381.8            | 9C      | 2  | 316.8             | 11G  | 2  | 244.7       | 9C     | 0  | 385.6 | 9TAAA  | 0 |
|          | N369.19 | 381.7            | 9C      | 2  | 316.9             | 11G  | 2  | 245.2       | 9C     | 0  | 385.3 | 9TAAA  | 0 |
|          | N369.20 | 381.7            | 9C      | 2  | 317.0             | 11G  | 2  | 245.4       | 9C     | 0  | 385.6 | 9TAAA  | 0 |
| V88/4th  | N449.1  | 380.6            | 8C      | 0  | 317.0>316.0(1.2)  | 11G  | 2  | 244.5/242.6 | 9C     | 0  | 385.2 | 9TAAA* | 0 |
|          | N449.2  | 380.7            | 8C      | 0  | 316.8             | 11G* | 2  | 242.6       | 9C     | 0  | 385.5 | 9TAAA  | 0 |
|          | N449.3  | 380.7            | 8C      | 0  | 316.8             | 11G  | 2  | 242.6       | 9C     | 0  | 385.2 | 9TAAA  | 0 |
|          | N449.4  | 380.7            | 8C      | 0  | 316.8             | 11G  | 2  | 242.4       | 9C     | 0  | 385.2 | 9TAAA  | 0 |
|          | N449.5  | 380.6            | 8C      | 0  | 317.8             | 12G* | 2  | 242.6       | 9C     | 0  | 385.4 | 9TAAA  | 0 |
|          | N449.6  | 380.7            | 8C      | 0  | 316.8             | 11G  | 2  | 242.6       | 9C     | 0  | 385.6 | 9TAAA  | 0 |
|          |         |                  |         |    |                   |      |    |             |        |    |       |        |   |
| V138/1st | N138.1  | 381.5            | 9C      | 2  | 318.0             | 12G  | 2  | 242.5       | 9C     | 0  | 397.0 | 12TAAA | 0 |
|          | N138.2  | 381.7            | 9C      | 2  | 317.9             | 12G* | 2  | 242.5       | 9C     | 0  | 397.0 | 12TAAA | 0 |
|          | N138.3  | 382.7/381.8(1.0) | 10C=9C* | 2  | 317.9             | 12G  | 2  | 242.4       | 9G     | 0  | 397.0 | 12TAAA | 0 |
|          | N138.4  | 382.6            | 10C     | 2  | 317.8             | 12G  | 2  | 242.7       | 9C     | 0  | 396.6 | 12TAAA | 0 |
|          | N138.5  | 381.6            | 9C      | 2  | 316.8             | 11G  | 2  | 242.6       | 9C     | 0  | 396.9 | 12TAAA | 0 |
|          | N138.6  | 381.6            | 9C      | 2  | 317.9             | 12G  | 2  | 242.7       | 9C     | 0  | 396.6 | 12TAAA | 0 |
| V138/2nd | N288.1  | 380.6            | 8C      | 0  | 318.1>317.1 (1.2) | 12G  | 2  | 242.5       | 9C     | 0  | 396.9 | 12TAAA | 0 |
|          | N288.2  | 381.8            | 9C      | 2  | 317.9             | 12G  | 2  | 242.4       | 9C     | 0  | 397.0 | 12TAAA | 0 |
|          | N288.3  | 381.8            | 9C      | 2  | 317.9             | 12G  | 2  | 242.5       | 9C     | 0  | 396.9 | 12TAAA | 0 |
|          | N288.4  | 381.7            | 9C      | 2  | 317.8             | 12G  | 2  | 242.6       | 9C     | 0  | 397.0 | 12TAAA | 0 |
|          | N288.5  | 381.6            | 9C      | 2# | 318.9             | 13G* | 2# | 242.7       | 9C     | 0# | 396.6 | 12TAAA | 0 |
|          | N288.6  | 381.6            | 9C      | 2  | 317.8             | 12G  | 2  | 242.6       | 9C     | 0  | 396.9 | 12TAAA | 0 |
| V138/3rd | N331.1  | 381.6            | 9C      | 2  | 318.1             | 12G  | 2  | 243.6       | 10C    | 0  | 396.5 | 12TAAA | 0 |
|          | N331.2  | 381.7            | 9C      | 2  | 317.9             | 12G  | 2  | 243.6       | 10C    | 0  | 396.8 | 12TAAA | 0 |
|          | N331.3  | 381.7            | 9C      | 2  | 317.9             | 12G  | 2  | 243.6       | 10C    | 0  | 396.5 | 12TAAA | 0 |
|          | N331.4  | 381.7            | 9C      | 2  | 317.8>316.8(1.2)  | 12G  | 2  | 242.6>243.6 | 9C/10C | 0  | 396.8 | 12TAAA | 0 |

|          |             |       |    |   |                  |      |    |                  |      |    |       |        |   |
|----------|-------------|-------|----|---|------------------|------|----|------------------|------|----|-------|--------|---|
|          | N331.5      | 381.7 | 9C | 2 | 316.8            | 11G  | 2  | 243.6            | 10C  | 0  | 396.7 | 12TAAA | 0 |
|          | N331.6      | 381.6 | 9C | 2 | 317.8            | 12G  | 2  | 243.5            | 10C  | 0  | 396.9 | 12TAAA | 0 |
| V138/4th | Replaced    |       |    |   |                  |      |    |                  |      |    |       |        |   |
|          |             |       |    |   |                  |      |    |                  |      |    |       |        |   |
|          | <b>cc60</b> |       |    |   |                  |      |    |                  |      |    |       |        |   |
| V114/1st | N114.1      | 377.0 | 6C | 2 | 316.7            | 12G* | 1  | 249.1            | 13C* | 2  |       |        |   |
|          | N114.2      | 377.0 | 6C | 2 | 316.8            | 12G  | 1  | 248.8            | 13C  | 2  |       |        |   |
|          | N114.3      |       |    |   | 318.8>317.8(1.1) | 14G  | 2  | 248.9            | 13C  | 2  |       |        |   |
|          | N114.4      |       |    |   | 317.8>318.8(1.1) | 14G  | 2  | 248.6            | 13C  | 2  |       |        |   |
|          | N114.5      | 377.0 | 6C | 2 | 317.0            | 12G  | 1  | 249.0            | 13C  | 2  |       |        |   |
|          | N114.6      | 377.0 | 6C | 2 | 316.9            | 12G  | 1  | 249.1            | 13C  | 2  |       |        |   |
|          | N114.7      | 376.9 | 6C | 2 | 317.8=318.9(1.0) | 14G  | 2  | 249.6>248.6(1.2) | 14C  | 1  |       |        |   |
|          | N114.8      | 377.0 | 6C | 2 | 316.9            | 12G  | 1  | 249.2            | 13C  | 2  |       |        |   |
|          | N114.9      | 376.9 | 6C | 2 | 316.7            | 12G  | 1  | 248.8            | 13C  | 2  |       |        |   |
|          | N114.10     | 376.9 | 6C | 2 |                  |      |    | 250.1            | 14C  | 1  |       |        |   |
|          | N114.11     |       |    |   |                  |      |    | 248.6            | 13C  | 2  |       |        |   |
|          | N114.12     |       |    |   |                  |      |    | 248.9            | 13C  | 2  |       |        |   |
|          | N114.13     | 376.9 | 6C | 2 | 318.8            | 14G  | 2  |                  |      |    |       |        |   |
|          | N114.14     | 377.0 | 6C | 2 |                  |      |    | 248.9            | 13C  | 2  |       |        |   |
|          | N114.15     | 377.1 | 6C | 2 | 316.9            | 12G  | 1  | 249.1            | 13C  | 2  |       |        |   |
|          | N114.16     | 377.1 | 6C | 2 | 316.8            | 12G  | 1  | 248.9            | 13C  | 2  |       |        |   |
|          | N114.17     | 376.9 | 6C | 2 | 316.8            | 12G  | 1  | 247.6            | 12C  | 2  |       |        |   |
|          | N114.18     | 377.1 | 6C | 2 | 316.9            | 12G  | 1  | 249.0            | 13C  | 2  |       |        |   |
| V114/2nd | N283.1      | 377.2 | 6C | 2 | 318.9            | 14G* | 2  | 248.6/246.3      | 13C  | 2  |       |        |   |
|          | N283.2      | 377.8 | 6C | 2 | 318.9            | 14G* | 2  | 246.3            | 13C  | 2  |       |        |   |
|          | N283.3      | 377.7 | 6C | 2 | 318.9            | 14G* | 2# | 245.3            | 12C  | 2# |       |        |   |
|          | N283.4      | 377.7 | 6C | 2 | 318.8>317.8(1.1) | 14G  | 2  | 246.5            | 13C  | 2  |       |        |   |
|          | N283.5      | 377.2 | 6C | 2 | 318.8>317.8(1.1) | 14G  | 2  | 245.4            | 12C  | 2  |       |        |   |
|          | N283.6      | 377.5 | 6C | 2 | 318.8>317.8(1.0) | 14G  | 2  | 245.5            | 12C* | 2  |       |        |   |
| V114/3rd | N330.1      | 376.9 | 6C | 2 | 317.8            | 13G* | 2  | 247.7            | 12C* | 2  |       |        |   |
|          | N330.2      | 377.0 | 6C | 2 | 317.7            | 13G  | 2  | 247.6            | 12C  | 2  |       |        |   |
|          | N330.3      | 376.9 | 6C | 2 | 318.8            | 14G  | 2  | 248.1            | 12C  | 2  |       |        |   |
|          | N330.4      | 377.0 | 6C | 2 | 317.7            | 13G  | 2  | 247.6            | 12C  | 2  |       |        |   |
|          | N330.5      |       |    |   | 317.9            | 13G  | 2  | 248.0            | 12C  | 2  |       |        |   |
|          | N330.6      |       |    |   | 318.8>317.7(1.1) | 14G  | 2  | 247.6            | 12C  | 2  |       |        |   |
|          | N330.7      | 376.9 | 6C | 2 | 317.7            | 13G  | 2  | 247.8            | 12C  | 2  |       |        |   |
|          | N330.8      |       |    |   |                  |      |    | 247.8            | 12C  | 2  |       |        |   |
|          | N330.9      | 377.1 | 6C | 2 |                  |      |    | 247.9            | 12C  | 2  |       |        |   |
|          | N330.10     | 377.1 | 6C | 2 | 315.6            | 11G  | 0? | 247.5            | 12C  | 2  |       |        |   |

|          |         |       |     |    |                   |     |    |                  |      |    |  |  |  |
|----------|---------|-------|-----|----|-------------------|-----|----|------------------|------|----|--|--|--|
|          | N330.11 | 377.0 | 6C  | 2  | 316.8             | 12G | 1  | 247.9            | 12C  | 2  |  |  |  |
|          | N330.12 | 377.1 | 6C  | 2  |                   |     |    |                  |      |    |  |  |  |
|          | N330.13 | 376.8 | 6C  | 2  | 318.9>317.9(1.2)  | 14G | 2  | 248.0            | 12C  | 2  |  |  |  |
|          | N330.14 | 377.0 | 6C  | 2  | 318.1>317.0(1.1)  | 13G | 2  | 248.4            | 12C? | 2  |  |  |  |
|          | N330.15 | 377.0 | 6C  | 2  | 318.0>319.0(1.1)  | 14G | 2  | 248.1            | 12C  | 2  |  |  |  |
|          | N330.16 | 377.0 | 6C  | 2  |                   |     |    | 247.6            | 12C  | 2  |  |  |  |
|          | N330.17 | 376.8 | 6C  | 2  | 318.8             | 14G | 2  | 248.1            | 12C  | 2  |  |  |  |
|          | N330.18 | 377.0 | 6C  | 2  |                   |     |    | 247.6            | 12C  | 2  |  |  |  |
|          | N330.19 | 376.9 | 6C  | 2  | 317.7=316.8(1.0)  | 13G | 2  | 248.6            | 13C  | 2  |  |  |  |
|          | N330.20 | 377.0 | 6C  | 2  | 317.8>318.9(1.13) | 14G | 2  | 247.4            | 12C? | 2  |  |  |  |
|          |         |       |     |    |                   |     |    |                  |      |    |  |  |  |
| V134/1st | N134.1  | 377.0 | 6C* | 2# | 316.7             | 12G | 1# | 248.6(249.7)     | 14C? | 1# |  |  |  |
|          | N134.2  | 377.1 | 6C  | 2  | 317.8             | 13G | 2  | 250.0>249.0(1.2) | 14C  | 1  |  |  |  |
|          | N134.3  | 376.9 | 6C  | 2  | 317.8             | 13G | 2  | 249.8            | 14C  | 1  |  |  |  |
|          | N134.4  | 377.1 | 6C  | 2  | 318.0             | 13G | 2  | 249.9>248.9(1.1) | 14C* | 1  |  |  |  |
|          | N134.5  | 377.0 | 6C  | 2  | 317.8             | 13G | 2  | 248.9            | 13C  | 2  |  |  |  |
|          | N134.6  | 377.1 | 6C  | 2  | 318.0             | 13G | 2  | 249.5            | 14C  | 1  |  |  |  |
|          | N134.7  | 376.9 | 6C  | 2  | 317.7             | 13G | 2  | 249.5>248.6(1.2) | 14C  | 1  |  |  |  |
|          | N134.8  | 377.1 | 6C  | 2  | 318.0             | 13G | 2  | 250.0            | 14C  | 1  |  |  |  |
|          | N134.9  |       |     |    | 317.7             | 13G | 2  | 249.5            | 14C  | 1  |  |  |  |
|          | N134.10 |       |     |    | 318.0             | 13G | 2  | 250.1>249.1(1.1) | 14C  | 1  |  |  |  |
|          | N134.11 | 376.8 | 6C  | 2  | 317.8             | 13G | 2  | 249.7            | 14C  | 1  |  |  |  |
|          | N134.12 | 376.9 | 6C  | 2  | 317.8             | 13G | 2  | 249.6            | 14C  | 1  |  |  |  |
|          | N134.13 | 376.9 | 6C  | 2  | 317.9             | 13G | 2  | 249.6>248.7(1.2) | 14C  | 1  |  |  |  |
|          | N134.14 | 376.9 | 6C  | 2  | 317.7             | 13G | 2  | 250.1            | 14C  | 1  |  |  |  |
|          | N134.15 | 377.0 | 6C  | 2  | 317.8             | 13G | 2  | 249.6>248.7(1.2) | 14C  | 1  |  |  |  |
|          | N134.16 | 377.0 | 6C  | 2  | 317.9             | 13G | 2  | 250.8>249.8(1.0) | 15C  | 1  |  |  |  |
|          | N134.17 | 376.9 | 6C  | 2  | 316.7             | 12G | 1  | 249.5>248.5(1.2) | 14C  | 1  |  |  |  |
|          | N134.18 | 377.0 | 6C  | 2  | 317.9             | 13G | 2  | 249.9            | 14C  | 1  |  |  |  |
| V134/2nd | N295.1  | 377.4 | 6C* | 2# | 318.0             | 13G | 2# | 245.4 (247.7)    | 12C  | 2# |  |  |  |
|          | N295.2  | 377.7 | 6C  | 2  | 317.9             | 13G | 2  | 245.3            | 12C  | 2  |  |  |  |
|          | N295.3  | 377.7 | 6C  | 2# | 317.9             | 13G | 2# | 248.1>247.2      | 15C* | 1# |  |  |  |
|          | N295.4  | 377.3 | 6C  | 2  | 317.8             | 13G | 2  | 245.4            | 12C  | 2  |  |  |  |
|          | N295.5  | 377.7 | 6C  | 2  | 317.9             | 13G | 2  | 248.4>247.5      | 15C  | 1  |  |  |  |
|          | N295.6  | 377.5 | 6C  | 2  | 317.8             | 13G | 2  | 247.3            | 14C  | 1  |  |  |  |
| V134/3rd | N333.1  | 376.8 | 6C* | 2  | 317.8             | 13G | 2  | 247.7            | 12C  | 2  |  |  |  |
|          | N333.2  | 377.0 | 6C  | 2  | 318.1             | 13G | 2  | 249.9            | 14C  | 1  |  |  |  |
|          | N333.3  | 376.8 | 6C  | 2  | 317.8             | 13G | 2  | 248.6            | 13C  | 2  |  |  |  |
|          | N333.4  | 377.0 | 6C  | 2  | 317.9             | 13G | 2  | 248.8            | 13C  | 2  |  |  |  |
|          | N333.5  | 376.8 | 6C  | 2  | 317.8             | 13G | 2  | 249.0            | 13C  | 2  |  |  |  |



|          |         |       |     |   |                  |      |    |             |      |    |  |  |  |
|----------|---------|-------|-----|---|------------------|------|----|-------------|------|----|--|--|--|
|          | N333.6  | 376.9 | 6C  | 2 | 318.2>317.1(1.2) | 13G  | 2  | 246.3       | 13G  | 2  |  |  |  |
|          | N333.7  | 376.9 | 6C  | 2 | 317.7            | 13G  | 2  | 248.5       | 13C  | 2  |  |  |  |
|          | N333.8  | 377.0 | 6C  | 2 | 318.0            | 13G  | 2  | 249.0       | 13C  | 2  |  |  |  |
|          | N333.9  | 376.9 | 6C* | 2 | 317.8            | 13G  | 2  | 248.5       | 13C  | 2  |  |  |  |
|          | N333.10 | 377.0 | 6C  | 2 | 318.0>317.0(1.2) | 13G  | 2  | 248.5       | 13C? | 2  |  |  |  |
|          | N333.11 | 376.8 | 6C  | 2 | 317.8            | 13G  | 2  | 248.5       | 13C  | 2  |  |  |  |
|          | N333.12 | 377.0 | 6C  | 2 | 318.0            | 13G  | 2  | 248.1       | 12C  | 2  |  |  |  |
|          | N333.13 | 376.9 | 6C  | 2 | 317.8            | 13G  | 2  | 248.7       | 13C  | 2  |  |  |  |
|          | N333.14 | 377.0 | 6C  | 2 | 318.0            | 13G  | 2  | 248.1       | 12C  | 2  |  |  |  |
|          | N333.15 | 376.7 | 6C  | 2 | 317.9>316.8(1.2) | 13G  | 2  | 250.1       | 14C  | 1  |  |  |  |
|          | N333.16 | 376.7 | 6C  | 2 | 317.8            | 13G  | 2  | 248.6       | 13C  | 2  |  |  |  |
|          | N333.17 |       |     |   | 317.8            | 13G  | 2  | 248.5       | 13C? | 2  |  |  |  |
|          | N333.18 |       |     |   | 318.1            | 13G  | 2  | 249.6       | 14C  | 1  |  |  |  |
|          | N333.19 | 376.9 | 6C  | 2 | 317.7            | 13G  | 2  | 248.4       | 13C? | 2  |  |  |  |
|          | N333.20 | 376.9 | 6C  | 2 | 317.9            | 13G  | 2  | 249.2       | 13C  | 2  |  |  |  |
|          |         |       |     |   |                  |      |    |             |      |    |  |  |  |
| V185/1st | N185.1  | 376.9 | 6C  | 2 | 318.0            | 13G  | 2  | 243.8       | 8C   | 0  |  |  |  |
|          | N185.2  | 376.8 | 6C  | 2 | 317.8            | 13G  | 2  | 243.5       | 8C   | 0  |  |  |  |
|          | N185.3  | 376.9 | 6C  | 2 | 317.9            | 13G  | 2  | 244.1       | 8C   | 0  |  |  |  |
|          | N185.4  | 376.8 | 6C  | 2 | 317.7            | 13G  | 2  | 243.7       | 8C   | 0  |  |  |  |
|          | N185.5  | 376.8 | 6C  | 2 | 317.9            | 13G  | 2  | 244.2       | 8C   | 0  |  |  |  |
|          | N185.6  | 376.7 | 6C  | 2 | 317.8            | 13G  | 2  | 243.9       | 8C   | 0  |  |  |  |
|          | N185.7  | 376.7 | 6C  | 2 | 318.0            | 13G  | 2  | 244.2       | 8C   | 0  |  |  |  |
|          | N185.8  | 376.8 | 6C  | 2 | 317.8            | 13G  | 2  | 243.9       | 8C   | 0  |  |  |  |
|          | N185.9  |       |     |   | 318.0            | 13G  | 2  | 244.1       | 8C   | 0  |  |  |  |
|          | N185.10 |       |     |   | 317.8            | 13G  | 2  | 243.7       | 8C   | 0  |  |  |  |
|          | N185.11 | 376.9 | 6C  | 2 |                  |      |    | 243.9       | 8C   | 0  |  |  |  |
|          | N185.12 | 377.0 | 6C  | 2 | 317.8            | 13G  | 2  | 243.6       | 8C   | 0  |  |  |  |
|          | N185.13 | 376.8 | 6C  | 2 | 318.1            | 13G  | 2  | 243.9       | 8C   | 0  |  |  |  |
|          | N185.14 | 376.9 | 6C  | 2 | 317.8            | 13G  | 2  | 243.5       | 8C   | 0  |  |  |  |
|          | N185.15 | 376.9 | 6C  | 2 | 317.9            | 13G  | 2  | 244.1       | 8C   | 0  |  |  |  |
|          | N185.16 | 376.9 | 6C  | 2 | 317.7            | 13G  | 2  | 243.6       | 8C   | 0  |  |  |  |
|          | N185.17 | 376.8 | 6C  | 2 | 317.8            | 13G  | 2  | 243.9       | 8C   | 0  |  |  |  |
|          | N185.18 | 376.9 | 6C  | 2 |                  |      |    | 243.6       | 8C   | 0  |  |  |  |
|          | N185.19 | 376.7 | 6C  | 2 | 318.0            | 13G  | 2  | 244.2       | 8C   | 0  |  |  |  |
|          | N185.20 | 377.0 | 6C  | 2 | 317.8            | 13G  | 2  | 243.7       | 8C   | 0  |  |  |  |
| V185/2nd | N306.1  | 377.3 | 6C  | 2 | 318.0            | 13G  | 2# | 243.7/241.5 | 8C   | 0# |  |  |  |
|          | N306.2  | 377.7 | 6C  | 2 | 317.9            | 13G* | 2  | 241.6       | 8C*  | 0  |  |  |  |
|          | N306.3  | 377.7 | 6C  | 2 | 317.8            | 13G  | 2  | 241.3       | 8C   | 0  |  |  |  |
|          | N306.4  | 377.7 | 6C  | 2 | 317.8>316.8(1.2) | 13G  | 2  | 241.6       | 8C   | 0  |  |  |  |

|          |         |       |    |   |                  |     |   |       |      |   |  |  |  |
|----------|---------|-------|----|---|------------------|-----|---|-------|------|---|--|--|--|
|          | N306.5  | 377.4 | 6C | 2 | 317.8            | 13G | 2 | 241.8 | 8C   | 0 |  |  |  |
|          | N306.6  | 377.7 | 6C | 2 | 317.8            | 13G | 2 | 241.7 | 8C   | 0 |  |  |  |
| V185/4th | N456.1  |       |    |   | 317.8            | 13G | 2 | 243.7 | 8C   | 0 |  |  |  |
|          | N456.2  |       |    |   | 317.8            | 13G | 2 | 243.6 | 8C   | 0 |  |  |  |
|          | N456.3  |       |    |   | 318.0            | 13G | 2 | 244.1 | 8C   | 0 |  |  |  |
|          | N456.4  |       |    |   | 317.7            | 13G | 2 | 243.6 | 8C   | 0 |  |  |  |
|          | N456.5  |       |    |   | 318.0            | 13G | 2 | 244.3 | 8C   | 0 |  |  |  |
|          | N456.6  |       |    |   | 317.9            | 13G | 2 | 243.8 | 8C   | 0 |  |  |  |
|          | N456.7  |       |    |   | 318.0            | 13G | 2 | 244.2 | 8C   | 0 |  |  |  |
|          | N456.8  |       |    |   | 317.8            | 13G | 2 | 243.8 | 8C   | 0 |  |  |  |
|          | N456.9  |       |    |   | 317.9            | 13G | 2 | 244.1 | 8C   | 0 |  |  |  |
|          | N456.10 |       |    |   | 317.8            | 13G | 2 | 243.7 | 8C   | 0 |  |  |  |
|          | N456.11 |       |    |   | 317.9            | 13G | 2 | 243.9 | 8C   | 0 |  |  |  |
|          | N456.12 |       |    |   | 317.7            | 13G | 2 | 243.5 | 8C   | 0 |  |  |  |
|          | N456.13 |       |    |   | 317.9            | 13G | 2 | 244.0 | 8C   | 0 |  |  |  |
|          | N456.14 |       |    |   | 317.8            | 13G | 2 | 243.6 | 8C   | 0 |  |  |  |
|          | N456.15 |       |    |   | 317.8            | 13G | 2 | 243.6 | 8C   | 0 |  |  |  |
|          | N456.16 |       |    |   | 317.8            | 13G | 2 | 243.9 | 8C   | 0 |  |  |  |
|          | N456.17 |       |    |   | 318.0            | 13G | 2 | 244.3 | 8C   | 0 |  |  |  |
|          | N456.18 |       |    |   | 317.8            | 13G | 2 | 243.8 | 8C   | 0 |  |  |  |
|          | N456.19 |       |    |   | 318.0            | 13G | 2 | 244.3 | 8C   | 0 |  |  |  |
|          | N456.20 |       |    |   | 317.8            | 13G | 2 | 243.9 | 8C   | 0 |  |  |  |
|          |         |       |    |   |                  |     |   |       |      |   |  |  |  |
| V113/1st | N113.1  | 377.7 | 6C | 2 | 317.9            | 13G | 2 | 246.3 | 13C  | 2 |  |  |  |
|          | N113.2  | 377.8 | 6C | 2 | 317.9            | 13G | 2 | 246.3 | 13C  | 2 |  |  |  |
|          | N113.3  | 377.7 | 6C | 2 | 317.9            | 13G | 2 | 246.3 | 13C* | 2 |  |  |  |
|          | N113.4  | 377.3 | 6C | 2 | 317.7            | 13G | 2 | 246.5 | 13C  | 2 |  |  |  |
|          | N113.5  | 377.7 | 6C | 2 | 317.8            | 13G | 2 | 246.3 | 13C  | 2 |  |  |  |
|          | N113.6  | 377.3 | 6C | 2 | 317.7>316.8(1.2) | 13G | 2 | 246.5 | 13C  | 2 |  |  |  |
| V113/2nd | N281.1  | 377.7 | 6C | 2 | 317.9            | 13G | 2 | 246.2 | 13C  | 2 |  |  |  |
|          | N281.2  | 377.7 | 6C | 2 | 317.8            | 13G | 2 | 246.2 | 13C  | 2 |  |  |  |
|          | N281.3  | 377.7 | 6C | 2 | 317.9            | 13G | 2 | 246.3 | 13C  | 2 |  |  |  |
|          | N281.4  | 377.6 | 6C | 2 | 317.7            | 13G | 2 | 246.3 | 13C  | 2 |  |  |  |
|          | N281.5  | 377.2 | 6C | 2 | 317.8            | 13G | 2 | 246.5 | 13C  | 2 |  |  |  |
|          | N281.6  | 377.6 | 6C | 2 | 317.8            | 13G | 2 | 246.3 | 13C  | 2 |  |  |  |
|          |         |       |    |   |                  |     |   |       |      |   |  |  |  |
| V115/1st | N115.1  | 377.8 | 6C | 2 | 317.9            | 13G | 2 | 247.2 | 14C  | 1 |  |  |  |
|          | N115.2  | 377.7 | 6C | 2 | 317.9            | 13G | 2 | 247.3 | 14C  | 1 |  |  |  |
|          | N115.3  | 377.8 | 6C | 2 | 317.8            | 13G | 2 | 247.2 | 14C  | 1 |  |  |  |
|          | N115.4  | 377.3 | 6C | 2 | 316.8            | 12G | 1 | 247.4 | 14C  | 1 |  |  |  |

|          |              |       |     |    |                  |      |    |                  |               |    |  |  |  |
|----------|--------------|-------|-----|----|------------------|------|----|------------------|---------------|----|--|--|--|
|          | N115.5       | 377.6 | 6C  | 2  | 317.8>316.8(1.2) | 13G  | 2  | 247.3            | 14C           | 1  |  |  |  |
|          | N115.6       | 377.4 | 6C  | 2  | 318.9>317.8(1.0) | 14G  | 2  | 247.6            | 14C           | 1  |  |  |  |
| V115/2nd | N282.1       | 377.8 | 6C  | 2  | 318.9            | 14G* | 2  | 247.2            | 14C           | 1  |  |  |  |
|          | N282.2       | 377.6 | 6C  | 2  | 316.8            | 12G  | 1  | 246.3>245.38     | 13C*          | 2  |  |  |  |
|          | N282.3       | 377.8 | 6C  | 2# | 318.9            | 14G  | 2# | 246.3            | 13C           | 2# |  |  |  |
|          | N282.4       | 377.6 | 6C  | 2  | 318.8>317.8(1.0) | 14G  | 2  | 246.3            | 13C           | 2  |  |  |  |
|          | N282.5       | 377.4 | 6C  | 2  | 318.8>317.8(1.0) | 14G  | 2  | 246.3>245.4      | 13C           | 2  |  |  |  |
|          | N282.6       | 377.7 | 6C  | 2  | 318.8>317.8(1.0) | 14G  | 2  | 245.5            | 12C           | 2  |  |  |  |
|          |              |       |     |    |                  |      |    |                  |               |    |  |  |  |
|          | <b>cc167</b> |       |     |    |                  |      |    |                  |               |    |  |  |  |
| V64/1st  | N64.1        | 384.9 | 13C | 0# | 315.8            | 11G  | 2# | 247.3            | 14C           | 1# |  |  |  |
|          | N64.2        | 384.0 | 12C | 0  | 315.7            | 11G  | 2  | 246.4>247.3(1.1) | 14C(1<br>3C*) | 1  |  |  |  |
|          | N64.3        | 383.8 | 12C | 0  | 315.8            | 11G  | 2  | 246.4>247.4(1.1) | 14C(1<br>3C*) | 1  |  |  |  |
|          | N64.4        | 384.2 | 12C | 0  | 315.7            | 11G  | 2  | 247.3=246.2(1.0) | 14C*          | 1  |  |  |  |
|          | N64.5        | 383.7 | 12C | 0  | 315.7            | 11G  | 2  | 246.0>246.9(1.0) | 14C           | 1  |  |  |  |
|          | N64.6        | 384.1 | 12C | 0  | 315.7            | 11G  | 2  | 246.3>247.2(1.1) | 14C           | 1  |  |  |  |
| V64/2nd  | N257.1       | 383.7 | 12C | 0  | 315.7            | 11G  | 2  | 247.2            | 14C           | 1  |  |  |  |
|          | N257.2       | 384.0 | 12C | 0  | 315.7            | 11G  | 2  | 247.3>248.2(1.1) | 15C(1<br>4C*) | 1  |  |  |  |
|          | N257.3       | 383.7 | 12C | 0  | 315.7            | 11G  | 2  | 247.3            | 14C           | 1  |  |  |  |
|          | N257.4       | 384.1 | 12C | 0  | 315.7            | 11G  | 2  | 248.3>247.4(1.2) | 15C           | 1  |  |  |  |
|          | N257.5       | 383.7 | 12C | 0  | 315.7            | 11G  | 2  | 247.3>246.4(1.1) | 14C           | 1  |  |  |  |
|          | N257.6       | 384.0 | 12C | 0  | 315.7            | 11G  | 2  | 247.4            | 14C*          | 1  |  |  |  |
| V64/3rd  | N348.1       | 382.7 | 11C | 1  | 315.8            | 11G  | 2  | 245.4            | 12C           | 2  |  |  |  |
|          | N348.2       | 384.0 | 12C | 0  | 316.8            | 12G  | 2  | 247.3            | 14C           | 1  |  |  |  |
|          | N348.3       | 383.8 | 12C | 0  | 316.8            | 12G  | 2  | 247.2>246.3(1.2) | 14C           | 1  |  |  |  |
|          | N348.4       | 384.1 | 12C | 0# | 316.8            | 12G  | 2# | 247.3            | 14C           | 1# |  |  |  |
|          | N348.5       | 383.8 | 12C | 0  | 316.8            | 12G  | 2  | 248.2>247.2(1.1) | 15C           | 1  |  |  |  |
|          | N348.6       | 383.1 | 11C | 1  | 315.7            | 11G  | 2  | 248.3>247.3(1.1) | 15C           | 1  |  |  |  |
|          |              |       |     |    |                  |      |    |                  |               |    |  |  |  |
| V117/1st | N117.1       | 382.7 | 11C | 1  | 316.8            | 12G  | 2  | 247.3            | 14C           | 1  |  |  |  |
|          | N117.2       | 383.1 | 11C | 1  | 316.8            | 12G  | 2  | 247.3            | 14C           | 1  |  |  |  |
| V117/2nd | N284.1       | 383.7 | 12C | 0  | 316.9            | 12G  | 2  | 246.3            | 13C           | 2  |  |  |  |
|          | N284.2       | 384.1 | 12C | 0  | 316.8            | 12G  | 2  | 246.2            | 13C           | 2  |  |  |  |
|          | N284.3       | 383.7 | 12C | 0  | 316.8            | 12G  | 2  | 246.3            | 13C           | 2  |  |  |  |
|          | N284.4       | 384.2 | 12C | 0  | 316.8            | 12G  | 2  | 247.2            | 14C           | 1  |  |  |  |
|          | N284.5       | 383.8 | 12C | 0  | 316.8            | 12G  | 2  | 246.3            | 13C           | 2  |  |  |  |
|          | N284.6       | 384.1 | 12C | 0  | 316.8            | 12G  | 2  | 246.3            | 13C           | 2  |  |  |  |
| V117/3rd | N332.1       | 383.7 | 12C | 0  | 316.7            | 12G  | 2  | 246.3            | 13C           | 2  |  |  |  |

|          |             |       |      |    |       |      |    |                  |      |     |  |  |  |
|----------|-------------|-------|------|----|-------|------|----|------------------|------|-----|--|--|--|
|          | N332.2      | 384.0 | 12C  | 0# | 315.8 | 11G* | 2# | 246.4            | 13C  | 2#  |  |  |  |
|          | N332.3      | 383.6 | 12C  | 0# | 316.7 | 12G  | 2# | 245.3            | 12C  | 2#  |  |  |  |
|          | N332.4      | 384.0 | 12C  | 0  | 315.7 | 11G  | 2  | 246.3            | 13C  | 2   |  |  |  |
|          | N332.5      | 382.6 | 11C  | 1  | 315.7 | 11G  | 2  | 246.2            | 13C  | 2   |  |  |  |
|          | N332.6      | 383.0 | 11C  | 1  | 316.7 | 12G  | 2  | 247.4            | 14C  | 1   |  |  |  |
| V117/4th | N417.1      | 383.7 | 12C  | 0  | 316.8 | 12G  | 2  | 246.3            | 13C  | 2   |  |  |  |
|          | N417.2      | 384.0 | 12C  | 0  | 316.8 | 12G  | 2  | 246.4            | 13C  | 2   |  |  |  |
|          | N417.3      | 383.7 | 12C  | 0  | 316.8 | 12G  | 2  | 247.2            | 14C  | 1   |  |  |  |
|          | N417.4      | 383.1 | 11C  | 1  | 316.8 | 12G  | 2  | 247.4            | 14C  | 1   |  |  |  |
|          | N417.5      | 383.7 | 12C  | 0  | 316.8 | 12G  | 2  | 248.3>247.3(1.1) | 15C  | 1   |  |  |  |
|          | N417.6      | 384.0 | 12C  | 0  | 316.8 | 12G  | 2  | 248.3>247.4(1.2) | 15C  | 1   |  |  |  |
|          |             |       |      |    |       |      |    |                  |      |     |  |  |  |
| V124/1st | N124.1      | 381.8 | 10C* | 2# | 315.7 | 11G  | 2# | 248.5>247.5(1.2) | 15C  | 1#  |  |  |  |
|          | N124.2      | 383.1 | 11C* | 1  | 315.8 | 11G* | 2  | 248.3>247.3(1.2) | 15C* | 1   |  |  |  |
|          | N124.3      | 381.9 | 10C  | 2# | 315.8 | 11G  | 2# | 246.3            | 13C  | 2#? |  |  |  |
|          | N124.4      | 383.1 | 11C  | 1  | 315.8 | 11G  | 2  | 247.4            | 14C  | 1   |  |  |  |
|          | N124.5      | 381.8 | 10C  | 2  | 315.8 | 11G  | 2  | 248.2>247.2(1.2) | 15C  | 1   |  |  |  |
|          | N124.6      | 381.9 | 10C  | 2  | 315.8 | 11G  | 2  | 247.4            | 14C* | 1   |  |  |  |
| V124/2nd | N290.1      | 382.7 | 11C  | 1  | 315.8 | 11G  | 2  | 246.3            | 13C  | 2   |  |  |  |
|          | N290.2      | 384.1 | 12C  | 0  | 315.8 | 11G  | 2  | 247.4>246.4(1.2) | 14C* | 1   |  |  |  |
|          | N290.3      | 382.7 | 11C  | 1  | 315.7 | 11G  | 2  | 246.3            | 13C  | 2   |  |  |  |
|          | N290.4      | 383.1 | 11C  | 1  | 315.8 | 11G  | 2  | 246.5            | 13C  | 2   |  |  |  |
|          | N290.5      | 382.6 | 11C* | 1# | 314.7 | 10G  | 1# | 246.3            | 13C  | 2#  |  |  |  |
|          | N290.6      | 382.0 | 10C  | 2  | 316.8 | 12G  | 2  | 248.3>247.4(1.1) | 15C* | 1   |  |  |  |
| V124/3rd | N336.1      | 383.7 | 12C  | 0  | 315.8 | 11G  | 2  | 247.4            | 14C  | 1   |  |  |  |
|          | N336.2      | 384.1 | 12C  | 0  | 315.7 | 11G  | 2  | 247.3>246.3(1.2) | 14C  | 1   |  |  |  |
|          | N336.3      | 382.9 | 11C  | 1  | 315.8 | 11G  | 2  | 247.3>246.4(1.2) | 14C  | 1   |  |  |  |
|          | N336.4      | 384.2 | 12C  | 0  | 315.7 | 11G  | 2  | 248.2>247.2(1.1) | 15C* | 1   |  |  |  |
|          | N336.5      | 383.9 | 12C  | 0  | 315.8 | 11G  | 2  | 247.5            | 14C  | 1   |  |  |  |
|          | N336.6      | 384.2 | 12C  | 0  | 315.7 | 11G  | 2  | 247.3>246.3(1.1) | 14C* | 1   |  |  |  |
|          |             |       |      |    |       |      |    |                  |      |     |  |  |  |
| cc23     |             |       |      |    |       |      |    |                  |      |     |  |  |  |
| V69/1st  | Non-carrier |       |      |    |       |      |    |                  |      |     |  |  |  |
| V69/2nd  | N258.1      | 382.8 | 11C  | 1  | 316.0 | 12G  | 2# | 251.1>250.1(1.2) | 18C* | 0#  |  |  |  |
|          | N258.2      | 383.2 | 11C  | 1  | 316.0 | 12G  | 2  | 251.1>250.1(1.2) | 18C  | 0   |  |  |  |
|          | N258.3      | 382.9 | 11C  | 1  | 316.0 | 12G  | 2  | 251.0>250.1(1.2) | 18C  | 0   |  |  |  |
|          | N258.4      | 383.2 | 11C  | 1  | 315.9 | 12G  | 2  | 251.2>250.2(1.3) | 18C  | 0   |  |  |  |
|          | N258.5      | 382.9 | 11C  | 1  | 316.0 | 12G  | 2  | 251.2>250.1(1.3) | 18C  | 0   |  |  |  |
|          | N258.6      | 383.2 | 11C  | 1  | 316.0 | 12G  | 2  | 251.2>250.2(1.3) | 18C  | 0   |  |  |  |

|         |             |           |      |    |             |               |    |                  |               |    |  |  |  |
|---------|-------------|-----------|------|----|-------------|---------------|----|------------------|---------------|----|--|--|--|
| V69/3rd | No sample   |           |      |    |             |               |    |                  |               |    |  |  |  |
| V69/4th | N431.1      | 382.9     | 11C  | 1  | 315.9       | 12G           | 2  | 246.3            | 13C           | 2  |  |  |  |
|         | N431.2      | 383.3     | 11C  | 1  | 316.0       | 12G           | 2  | 246.4            | 13C           | 2  |  |  |  |
|         | N431.3      | 382.8     | 11C  | 1  | 316.1       | 12G*          | 2  | 246.3            | 13C           | 2  |  |  |  |
|         | N431.4      | 383.2     | 11C  | 1  | 316.0       | 12G           | 2  | 245.5            | 12C           | 2  |  |  |  |
|         | N431.5      | 382.6     | 11C  | 1  | 317>316     | 13G*          | 1# | 246.3            | 13C           | 2# |  |  |  |
|         | N431.6      | 383.1     | 11C  | 1  | 316.9>318   | 14G*          | 1# | 246.4            | 13C           | 2# |  |  |  |
|         |             |           |      |    |             |               |    |                  |               |    |  |  |  |
| V93/1st | Non-carrier |           |      |    |             |               |    |                  |               |    |  |  |  |
| V93/2nd | N264.1      | 384.1     | 12C  | 0  | 315.9>314.9 | 12G*          | 2  | 249.2>250.1(1.1) | 17C           | 0  |  |  |  |
|         | N264.2      | 384.1     | 12C  | 0  | 315.9       | 12G           | 2  | 249.3>250.2(1.1) | 17C           | 0  |  |  |  |
|         | N264.3      | 383.2     | 11C  | 1  | 316.0       | 12G           | 2  | 249.2>248.2(1.0) | 16C           | 0  |  |  |  |
|         | N264.4      | 384.4     | 12C  | 0  | 316.0       | 12G           | 2  | 249.3>250.3(1.2) | 17C           | 0  |  |  |  |
|         | N264.5      | 384.3     | 12C  | 0  | 316.0       | 12G           | 2  | 249.2>250.1(1.2) | 17C           | 0  |  |  |  |
|         | N264.6      | 383.4     | 11C  | 1  | 315.0       | 11G           | 2  | 247.5            | 14C           | 1  |  |  |  |
| V93/3rd | N359.1      | 384.3     | 12C  | 0  | 316.0       | 12G           | 2  | 246.3            | 13C           | 2  |  |  |  |
|         | N359.2      | 384.4     | 12C  | 0  | 316.0>315.0 | 12G*          | 2  | 246.4            | 13C           | 2  |  |  |  |
|         | N359.3      | 383.2     | 11C  | 1  | 316.0       | 12G           | 2  | 246.3            | 13C           | 2  |  |  |  |
|         | N359.4      | 383.3     | 11C  | 1  | 316.0       | 12G           | 2  | 246.4            | 13C           | 2  |  |  |  |
|         | N359.5      | 383.2     | 11C  | 1  | 315.0       | 11G           | 2  | 248.2>247.2(1.2) | 15C           | 1  |  |  |  |
|         | N359.6      | 384.3     | 12C  | 0  | 316.0       | 12G           | 2  | 246.4            | 13C           | 2  |  |  |  |
|         |             |           |      |    |             |               |    |                  |               |    |  |  |  |
| V96/1st | Non-carrier |           |      |    |             |               |    |                  |               |    |  |  |  |
| V96/2nd | N259.1      | 383.2     | 11C  | 1  | 315.9       | 12G           | 2  | 250.9>250.0(1.0) | 18C*          | 0  |  |  |  |
|         | N259.2      | 383.3     | 11C  | 1  | 315.9>314.8 | 12G*          | 2  | 250.9>250.0(1.0) | 18C           | 0  |  |  |  |
|         | N259.3      | 383.3     | 11C  | 1  | 316.0       | 12G#          | 2  | 248>247.1(1.0)   | 15C           | 1# |  |  |  |
|         | N259.4      | 383.3     | 11C  | 1# | 316.0       | 12G           | 2# | 251>250.1(1.1)   | 18C           | 0# |  |  |  |
|         | N259.5      | 383.4     | 11C  | 1  | 316.0       | 12G           | 2  | 251>250(1.1)     | 18C           | 0  |  |  |  |
|         | N259.6      | 383.4     | 11C  | 1  | 316.0>314.9 | 12G*          | 2  | 248>247.1(1.0)   | 15C           | 1  |  |  |  |
| V96/3rd | N370.1      | 383.3     | 11C  | 1  | 317.0>318.0 | 14G<br>(13G*) | 1  | 246.3            | 13C           | 2  |  |  |  |
|         | N370.2      | 384.3>383 | 12C* | 0  | 319.0>318.0 | 15G*          | 1  | 247.2>248.1(1.1) | 15C<br>(14C*) | 1  |  |  |  |
|         | N370.3      | 384.2     | 12C  | 0  | 317.0>316.0 | 13G*          | 1  | 244.4            | 11C           | 1  |  |  |  |
|         | N370.4      | 385.3     | 13C  | 0# | 319.0>318.0 | 15G*          | 1# | 246.2            | 13C           | 2# |  |  |  |
|         | N370.5      | 384.2     | 12C  | 0# | 320.0>319.0 | 16G*          | 1# | 247.1>246.2(1.1) | 14C           | 1# |  |  |  |
|         | N370.6      | 383.4     | 11C  | 1  | 317.0>318.0 | 14G<br>(13G*) | 1  | 247.2            | 14C           | 1  |  |  |  |

|             |        |       |      |    |             |               |    |                   |               |    |       |       |   |
|-------------|--------|-------|------|----|-------------|---------------|----|-------------------|---------------|----|-------|-------|---|
| V96/4th     | N445.1 | 384.1 | 12C  | 0  | 314.9       | 11G           | 2# | 245.3             | 12C           | 2# |       |       |   |
|             | N445.2 | 383.3 | 11C  | 1  | 314.9       | 11G           | 2  | 245.2             | 12C           | 2  |       |       |   |
|             | N445.3 | 384.2 | 12C  | 0  | 315.0       | 11G           | 2  | 245.3             | 12C           | 2  |       |       |   |
|             | N445.4 | 384.3 | 12C  | 0  | 314.9       | 11G           | 2  | 245.3             | 12C           | 2  |       |       |   |
|             | N445.5 | 385.3 | 13C  | 0  | 317.0>316.0 | 13G*          | 2  | 245.3             | 12C           | 2  |       |       |   |
|             | N445.6 | 385.4 | 13C  | 0# | 318.0>319.0 | 15G<br>(14G*) | 1# | 245.2             | 12C           | 2# |       |       |   |
|             |        |       |      |    |             |               |    |                   |               |    |       |       |   |
| V222/1st    | N222.1 | 382.8 | 11C  | 1  | 316.0       | 12G           | 2  | 245.3             | 12C           | 2  |       |       |   |
|             | N222.2 | 383.2 | 11C  | 1  | 315.9       | 12G           | 2  | 251.1>252.1(1.01) | 19C           | 0  |       |       |   |
|             | N222.3 | 382.7 | 11C  | 1  | 315.9       | 12G           | 2  | 245.4             | 12C           | 2  |       |       |   |
|             | N222.4 | 383.1 | 11C  | 1  | 315.9       | 12G           | 2  | 245.3             | 12C           | 2  |       |       |   |
|             | N222.5 | 382.7 | 11C  | 1  | 315.9       | 12G           | 2  | 245.4             | 12C           | 2  |       |       |   |
|             | N222.6 | 383.0 | 11C  | 1  | 315.9       | 12G           | 2  | 250.1>251.1(1.2)  | 18C           | 0  |       |       |   |
| V222/2nd    | N309.1 | 382.8 | 11C  | 1  | 315.9       | 12G           | 2  | 251.9>251.1(1.1)  | 19C           | 0  |       |       |   |
|             | N309.2 | 383.2 | 11C  | 1  | 315.9       | 12G           | 2  | 252.1>251.2(1.1)  | 19C           | 0  |       |       |   |
|             | N309.3 | 382.8 | 11C  | 1  | 316.0       | 12G           | 2  | 252>251.0(1.1)    | 19C           | 0  |       |       |   |
|             | N309.4 | 383.1 | 11C  | 1  | 315.9       | 12G           | 2  | 252.2>251.2(1.0)  | 19C           | 0  |       |       |   |
|             | N309.5 | 382.8 | 11C  | 1  | 316.0       | 12G           | 2  | 251.0>251.9(1.1)  | 19C           | 0  |       |       |   |
|             | N309.6 | 383.1 | 11C  | 1  | 315.9       | 12G           | 2  | 252.0>251.1(1.0)  | 19C           | 0  |       |       |   |
| V222/3rd    | N391.1 | 382.8 | 11C  | 1  | 314.9       | 11G           | 2  | 252.1>251(1.1)    | 19C           | 0  |       |       |   |
|             | N391.2 | 383.2 | 11C  | 1  | 314.9       | 11G           | 2  | 251.9>250.9(1.1)  | 19C           | 0  |       |       |   |
|             | N391.3 | 383.2 | 11C  | 1  | 315.0       | 11G           | 2  | 250.9>251.9(1.2)  | 19C<br>(18C*) | 0  |       |       |   |
|             | N391.4 | 383.3 | 11C  | 1  | 314.9       | 11G           | 2  | 250.9>251.9(1.1)  | 19C           | 0  |       |       |   |
|             | N391.5 | 383.2 | 11C  | 1  | 314.9       | 11G           | 2  | 251>251.9(1.1)    | 19C           | 0  |       |       |   |
|             | N391.6 | 383.3 | 11C  | 1  | 315.0       | 11G           | 2  | 250.9>251.9(1.1)  | 19C           | 0  |       |       |   |
| V222/4th    | N459.1 | 383.2 | 11C  | 1  | 315.0       | 11G           | 2  | 250.9>250.1(1.1)  | 18C           | 0  |       |       |   |
|             | N459.2 | 383.3 | 11C  | 1  | 315.0       | 11G           | 2  | 250.9>251.9(1.1)  | 19C           | 0  |       |       |   |
|             | N459.3 | 383.3 | 11C  | 1  | 314.9       | 11G           | 2  | 253>253.9(1.1)    | 21C           | 0  |       |       |   |
|             | N459.4 | 383.3 | 11C  | 1  | 314.9       | 11G           | 2  | 251>251.9(1.1)    | 19C           | 0# |       |       |   |
|             | N459.5 | 383.2 | 11C  | 1  | 315.0       | 11G           | 2  | 251.8>250.9(1.1)  | 19C           | 0  |       |       |   |
|             | N459.6 | 384.3 | 12C* | 0# | 313.9       | 10G*          | 1  | 251>251.9(1.0)    | 19C           | 0  |       |       |   |
|             |        |       |      |    |             |               |    |                   |               |    |       |       |   |
| <b>cc32</b> |        |       |      |    |             |               |    |                   |               |    |       |       |   |
| V176/1st    | N176.1 | 379.7 | 9C   | 2  | 316.9       | 11G*          | 2  | 245.5             | 10C?          | 0  | 385.9 | 9TAAA | 0 |
|             | N176.2 | 379.6 | 9C   | 2  | 316.8       | 11G           | 2  | 249.2>250.1(1.1)  | 17C           | 0  | 385.5 | 9TAAA | 0 |
|             | N176.3 | 379.7 | 9C   | 2# | 316.9       | 11G#          | 2  | 251.3=252.3(1.0)  | 17C#          | 0  | 385.5 | 9TAAA | 0 |
|             | N176.4 | 379.7 | 9C   | 2  | 316.8       | 11G           | 2  | 248.4             | 12C           | 2  |       |       |   |

|          |         |       |     |    |       |      |    |                  |      |    |       |        |   |
|----------|---------|-------|-----|----|-------|------|----|------------------|------|----|-------|--------|---|
|          | N176.5  | 379.6 | 9C  | 2  | 316.8 | 11G  | 2  | 249.6            | 14C  | 1  | 385.6 | 9TAAA  | 0 |
|          | N176.6  | 379.6 | 9C  | 2# | 316.8 | 11G# | 2  | 252.2=251.3(1.0) | 17C# | 0  | 385.7 | 9TAAA  | 0 |
|          | N176.7  |       |     |    | 316.9 | 11G  | 2  | 252.3=251.4(1.0) | 17C  | 0  | 385.6 | 9TAAA  | 0 |
|          | N176.8  |       |     |    | 316.8 | 11G  | 2  | 250.8=251.7(1.0) | 17C  | 0  | 385.7 | 9TAAA  | 0 |
|          | N176.9  |       |     |    | 317.8 | 12G  | 2  | 249.7            | 14C  | 1  | 385.6 | 9TAAA  | 0 |
|          | N176.10 |       |     |    |       |      |    | 251.4=252.3(1.0) | 17C  | 0  | 385.7 | 9TAAA  | 0 |
|          | N176.11 |       |     |    | 316.9 | 11G  | 2  | 252.4=251.6(1.0) | 17C  | 0  | 385.6 | 9TAAA  | 0 |
|          | N176.12 |       |     |    | 316.8 | 11G  | 2  | 249.6            | 14C  | 1  | 385.6 | 9TAAA  | 0 |
|          | N176.13 |       |     |    | 316.9 | 11G  | 2  | 251.3>252.2(1.1) | 17C  | 0  | 385.4 | 9TAAA  | 0 |
|          | N176.14 |       |     |    | 316.8 | 11G  | 2  | 251.1=252.1(1.0) | 16C  | 0  | 385.6 | 9TAAA  | 0 |
|          | N176.15 |       |     |    | 316.8 | 11G  | 2  | 251.3>252.3(1.1) | 16C  | 0  | 385.6 | 9TAAA  | 0 |
|          | N176.16 |       |     |    | 316.8 | 11G  | 2  | 245.3            | 10C  | 0  | 385.6 | 9TAAA  | 0 |
|          | N176.17 |       |     |    | 318.9 | 13G  | 2  | 252.3=251.3(1.0) | 16C  | 0  | 385.6 | 9TAAA  | 0 |
|          | N176.18 |       |     |    | 316.8 | 11G  | 2  | 245.4            | 10C  | 0  | 385.7 | 9TAAA  | 0 |
|          | N176.19 |       |     |    | 316.8 | 11G  | 2  | 245.6            | 10C  | 0  | 385.7 | 9TAAA  | 0 |
|          | N176.20 |       |     |    | 316.9 | 11G  | 2  | 249.4            | 14C  | 1  | 385.7 | 9TAAA  | 0 |
|          |         |       |     |    |       |      |    |                  |      |    |       |        |   |
| V176/2nd | N318.1  | 379.6 | 9C  | 2  | 316.8 | 11G  | 2  | 243.6            | 10C  | 0  | 385.3 | 9TAAA  | 0 |
|          | N318.2  | 379.7 | 9C  | 2  | 316.8 | 11G  | 2  | 246.3            | 13C  | 2  | 385.5 | 9TAAA  | 0 |
|          | N318.3  | 379.5 | 9C  | 2  | 316.8 | 11G  | 2  | 243.5            | 10C  | 0  | 385.3 | 9TAAA  | 0 |
|          | N318.4  | 379.6 | 9C  | 2  | 316.8 | 11G  | 2  | 243.4            | 10C* | 0  | 385.5 | 9TAAA  | 0 |
|          | N318.5  | 379.5 | 9C  | 2  | 316.7 | 11G* | 2  | 247.4            | 14C  | 1  | 385.4 | 9TAAA  | 0 |
|          | N318.6  | 379.6 | 9C  | 2# | 316.8 | 11G# | 2  | 246.3            | 13C* | 2# | 385.5 | 9TAAA  | 0 |
| V176/3rd | N399.1  | 379.6 | 9C  | 2  | 316.8 | 11G  | 2  | 247.4            | 14C  | 1  | 385.3 | 9TAAA  | 0 |
|          | N399.2  | 378.7 | 8C  | 0# | 316.8 | 11G  | 2# | 247.2            | 14C  | 1# | 385.6 | 9TAAA  | 0 |
|          | N399.3  | 379.6 | 9C* | 2  | 316.8 | 11G  | 2  | 247.4            | 14C  | 1  | 385.3 | 9TAAA  | 0 |
|          | N399.4  | 379.7 | 9C  | 2  | 316.8 | 11G  | 2  | 247.1>246.3(1.0) | 14C  | 1  | 385.4 | 9TAAA  | 0 |
|          | N399.5  | 378.6 | 8C  | 0  | 316.8 | 11G  | 2  | 247.5            | 14C  | 1  | 385.1 | 9TAAA  | 0 |
|          | N399.6  | 379.7 | 9C  | 2  | 316.8 | 11G  | 2  | 247.3            | 14C  | 1  | 385.4 | 9TAAA  | 0 |
| V176/4th | N408.1  | 380.6 | 10C | 2  | 317.9 | 12G  | 2  |                  | 14C  | 1  | 384.8 | 9TAAA  | 0 |
|          | N408.2  | 378.7 | 8C  | 0  | 316.8 | 11G  | 2  | 249.6            | 14C  | 1  | 385.6 | 9TAAA  | 0 |
|          | N408.3  | 380.7 | 10C | 2# | 317.8 | 12G  | 2# | 250.5            | 15C  | 0# | 385.8 | 9TAAA* | 0 |
|          | N408.4  | 378.5 | 8C  | 0  | 316.8 | 11G  | 2  | 249.7            | 14C  | 1  | 385.6 | 9TAAA  | 0 |
|          | N408.5  | 378.7 | 8C* | 0  | 316.8 | 11G  | 2  | 249.6            | 14C  | 1  | 385.6 | 9TAAA  | 0 |
|          | N408.6  | 380.6 | 10C | 2  | 317.9 | 12G  | 2  | 250.4/249.4(1.1) | 15C  | 0  | 385.5 | 9TAAA  | 0 |
|          | N408.7  |       |     |    | 317.8 | 12G  | 2  |                  |      |    | 385.7 | 9TAAA  | 0 |
|          | N408.8  |       |     |    | 317.9 | 12G  | 2  | 250.4            | 15C  | 0  | 385.6 | 9TAAA  | 0 |
|          | N408.9  |       |     |    | 317.9 | 12G  | 2  | 250.3>249.3(1.1) | 15C  | 0  | 385.6 | 9TAAA  | 0 |
|          | N408.10 |       |     |    | 317.9 | 12G  | 2  | 250.4            | 15C  | 0  | 385.8 | 9TAAA  | 0 |

|         |  |  |  |       |     |   |                  |     |   |       |       |   |
|---------|--|--|--|-------|-----|---|------------------|-----|---|-------|-------|---|
| N408.11 |  |  |  | 317.8 | 12G | 2 | 250.3>249.3(1.1) | 15C | 0 | 385.8 | 9TAAA | 0 |
| N408.12 |  |  |  | 316.8 | 11G | 2 | 249.4            | 14C | 1 | 385.7 | 9TAAA | 0 |
| N408.13 |  |  |  | 316.8 | 11G | 2 | 249.3            | 14C | 1 | 385.8 | 9TAAA | 0 |
| N408.14 |  |  |  | 317.8 | 12G | 2 | 249.7>250.6(1.1) | 15C | 0 | 385.7 | 9TAAA | 0 |
| N408.15 |  |  |  | 317.8 | 12G | 2 | 250.5>249.5(1.1) | 15C | 0 | 385.7 | 9TAAA | 0 |
| N408.16 |  |  |  | 317.9 | 12G | 2 | 250.7            | 15C | 0 | 385.6 | 9TAAA | 0 |
| N408.17 |  |  |  | 317.8 | 12G | 2 | 250.5>249.6(1.1) | 15C | 0 | 385.8 | 9TAAA | 0 |
| N408.18 |  |  |  | 316.8 | 11G | 2 | 250.6            | 15C | 0 | 385.5 | 9TAAA | 0 |
| N408.19 |  |  |  | 317.8 | 12G | 2 | 250.5            | 15C | 0 | 385.6 | 9TAAA | 0 |
| N408.20 |  |  |  | 316.8 | 11G | 2 | 248.6            | 13C | 2 | 385.6 | 9TAAA | 0 |
| N408.21 |  |  |  | 316.8 | 11G | 2 | 248.5            | 13C | 2 | 385.6 | 9TAAA | 0 |
| N408.22 |  |  |  | 317.8 | 12G | 2 | 250.5            | 15C | 0 |       |       |   |

<sup>1</sup>Fragment size is given for the primary peak where the ratio of primary to secondary peak was >1.2. Where the ratio was <1.2 then the sizes of both peaks are given with the ratio in brackets and the size of the largest peak was utilised for determining tract length; <sup>2</sup>Asterisks indicates that the tract length was confirmed by sequencing; <sup>3</sup>Expression states were determined by Western blotting for marked (#) isolates. For genes with tracts within the reading frame, the coding was 1 for ON and 0 for OFF. For genes with tracts within the promoter, the coding was 2 for high, 1 for intermediate and 0 for low/undetectable; <sup>4</sup>GeneScan sizes were determined using one of two PeakScanner algorithms resulting in different sizes for the same tract length. Blue, GS500LIZ3130. Black, GS500LIZ. Shading indicates genes that have different GeneScan sizes/tract lengths relative to the majority type in the first time point.





|         |         |       |      |   |  |  |       |      |   |       |      |   |
|---------|---------|-------|------|---|--|--|-------|------|---|-------|------|---|
|         | N349.12 | 306.9 | 12G  | 0 |  |  |       |      |   |       |      |   |
|         | N349.13 | 307.1 | 12G  | 0 |  |  |       |      |   |       |      |   |
|         | N349.14 | 307.1 | 12G  | 0 |  |  |       |      |   |       |      |   |
|         | N349.15 | 306.9 | 12G  | 0 |  |  |       |      |   |       |      |   |
|         | N349.16 | 306.9 | 12G  | 0 |  |  |       |      |   |       |      |   |
|         | N349.17 | 306.9 | 12G  | 0 |  |  |       |      |   |       |      |   |
|         | N349.18 | 306.9 | 12G  | 0 |  |  |       |      |   |       |      |   |
|         | N349.19 | 307.1 | 12G  | 0 |  |  |       |      |   |       |      |   |
|         | N349.20 | 307.0 | 12G  | 0 |  |  |       |      |   |       |      |   |
| V43/4th | Cleared |       |      |   |  |  |       |      |   |       |      |   |
|         |         |       |      |   |  |  |       |      |   |       |      |   |
| V51/1st | N51.1   | 309.6 | 12G* | 0 |  |  | 316.2 | 10C  | 1 | 378.0 | 11C  | 0 |
|         | N51.2   | 306.9 | 12G  | 0 |  |  | 316.2 | 10C  | 1 | 377.9 | 11C  | 0 |
|         | N51.3   | 306.9 | 12G  | 0 |  |  | 316.2 | 10C  | 1 | 378.0 | 11C  | 0 |
|         | N51.4   | 307.0 | 12G  | 0 |  |  | 316.1 | 10C  | 1 | 378.2 | 11C  | 0 |
|         | N51.5   | 307.0 | 12G  | 0 |  |  | 316.0 | 10C  | 1 | 378.2 | 11C  | 0 |
|         | N51.6   |       |      |   |  |  | 316.1 | 10C  | 1 | 378.2 | 11C  | 0 |
| V51/2nd | N236.1  | 307.0 | 12G  | 0 |  |  | 316.2 | 10C  | 1 | 377.9 | 11C  | 0 |
|         | N236.2  | 308.0 | 13G  | 1 |  |  | 316.2 | 10C  | 1 | 378.0 | 11C  | 0 |
|         | N236.3  | 307.9 | 13G  | 1 |  |  | 316.2 | 10C  | 1 | 378.0 | 11C  | 0 |
|         | N236.4  | 305.9 | 11G  | 0 |  |  | 316.1 | 10C  | 1 | 378.2 | 11C  | 0 |
|         | N236.5  | 308.0 | 13G  | 1 |  |  | 316.0 | 10C  | 1 | 378.2 | 11C  | 0 |
|         | N236.6  | 308.0 | 13G  | 1 |  |  | 316.1 | 10C  | 1 | 378.3 | 11C  | 0 |
| V51/3rd | N354.1  |       | 13G* | 1 |  |  | 316.2 | 10C  | 1 | 378.0 | 11C  | 0 |
|         | N354.2  | 308.0 | 13G  | 1 |  |  | 316.2 | 10C  | 1 | 378.0 | 11C  | 0 |
|         | N354.3  | 308.0 | 13G  | 1 |  |  | 316.3 | 10C  | 1 | 378.0 | 11C  | 0 |
|         | N354.4  | 308.0 | 13G  | 1 |  |  | 316.1 | 10C  | 1 | 378.1 | 11C  | 0 |
|         | N354.5  | 307.9 | 13G  | 1 |  |  | 316.0 | 10C  | 1 | 378.3 | 11C  | 0 |
|         | N354.6  | 308.0 | 13G  | 1 |  |  | 316.1 | 10C  | 1 | 378.3 | 11C  | 0 |
| V51/4th | N424.1  |       | 13G* | 1 |  |  | 316.2 | 10C  | 1 | 377.9 | 11C  | 0 |
|         | N424.2  | 308.0 | 13G  | 1 |  |  | 316.2 | 10C  | 1 | 378.0 | 11C  | 0 |
|         | N424.3  | 308.0 | 13G  | 1 |  |  | 316.3 | 10C  | 1 | 378.0 | 11C  | 0 |
|         | N424.4  | 308.0 | 13G  | 1 |  |  | 316.0 | 10C  | 1 | 378.2 | 11C  | 0 |
|         | N424.5  | 308.0 | 13G  | 1 |  |  | 316.0 | 10C  | 1 | 378.2 | 11C  | 0 |
|         | N424.6  | 307.9 | 13G  | 1 |  |  | 316.0 | 10C  | 1 | 378.3 | 11C  | 0 |
|         |         |       |      |   |  |  |       |      |   |       |      |   |
| V52/1st | N52.1   |       | 13G* | 1 |  |  | 316.2 | 10C* | 1 | 378.0 | 11C* | 0 |
|         | N52.2   | 308.0 | 13G* | 1 |  |  | 316.2 | 10C  | 1 | 377.9 | 11C  | 0 |
|         | N52.3   | 308.0 | 13G  | 1 |  |  | 316.2 | 10C  | 1 | 378.0 | 11C  | 0 |
|         | N52.4   | 308.0 | 13G  | 1 |  |  | 316.1 | 10C  | 1 | 378.2 | 11C  | 0 |

|         |          |             |      |   |  |  |  |       |     |    |       |     |   |
|---------|----------|-------------|------|---|--|--|--|-------|-----|----|-------|-----|---|
|         | N52.5    | 308.1       | 13G  | 1 |  |  |  | 316.1 | 10C | 1  | 378.2 | 11C | 0 |
|         | N52.6    | 308.0       | 13G  | 1 |  |  |  | 316.1 | 10C | 1  | 378.2 | 11C | 0 |
| V52/2nd | N238.1   | 308.0       | 13G  | 1 |  |  |  | 316.2 | 10C | 1  | 378.0 | 11C | 0 |
|         | N238.2   | 307.9       | 13G  | 1 |  |  |  | 316.2 | 10C | 1  | 378.0 | 11C | 0 |
|         | N238.3   | 305.9       | 11G  | 0 |  |  |  | 316.2 | 10C | 1  | 378.0 | 11C | 0 |
|         | N238.4   | 305.9       | 11G  | 0 |  |  |  | 316.2 | 10C | 1  | 378.2 | 11C | 0 |
|         | N238.5   | 308.1       | 13G  | 1 |  |  |  | 316.1 | 10C | 1  | 378.2 | 11C | 0 |
|         | N238.6   | 305.9       | 11G  | 0 |  |  |  | 316.1 | 10C | 1  | 378.3 | 11C | 0 |
| V52/3rd | N342.1   | 305.9       | 11G  | 0 |  |  |  | 316.2 | 10C | 1  | 378.0 | 11C | 0 |
| V52/4th | Cleared  |             |      |   |  |  |  |       |     |    |       |     |   |
|         |          |             |      |   |  |  |  |       |     |    |       |     |   |
| V54/1st | N54.1.1  | 309.0>308.0 | 14G* | 0 |  |  |  | 316.2 | 10C | 1  | 375.3 | 8C  | 0 |
|         | N54.1.2  | 307.0       | 12G  | 0 |  |  |  |       |     |    |       |     |   |
|         | N54.1.3  | 307.0       | 12G  | 0 |  |  |  |       |     |    |       |     |   |
|         | N54.1.4  | 307.0       | 12G  | 0 |  |  |  |       |     |    |       |     |   |
|         | N54.1.5  | 306.9       | 12G  | 0 |  |  |  |       |     |    |       |     |   |
|         | N54.1.6  | 308.2       | 13G  | 1 |  |  |  |       |     |    |       |     |   |
|         | N54.1.7  | 305.9       | 11G  | 0 |  |  |  |       |     |    |       |     |   |
|         | N54.1.8  | 308.1       | 13G  | 1 |  |  |  |       |     |    |       |     |   |
|         | N54.1.9  | 310.1       | 15G  | 0 |  |  |  |       |     |    |       |     |   |
|         | N54.1.10 | 306.0       | 11G  | 0 |  |  |  |       |     |    |       |     |   |
|         | N54.1.11 | 306.9       | 12G  | 0 |  |  |  |       |     |    |       |     |   |
|         | N54.1.12 | 306.9       | 12G  | 0 |  |  |  |       |     |    |       |     |   |
|         | N54.2    | 306.9       | 12G  | 0 |  |  |  | 316.2 | 10C | 1  | 375.2 | 8C  | 0 |
|         | N54.3    | 306.9       | 12G  | 0 |  |  |  | 316.2 | 10C | 1  | 375.3 | 8C  | 0 |
|         | N54.4    | 307.0       | 12G  | 0 |  |  |  | 316.2 | 10C | 1  | 375.3 | 8C  | 0 |
|         | N54.5    | 306.9       | 12G  | 0 |  |  |  | 316.2 | 10C | 1  | 375.3 | 8C  | 0 |
|         | N54.6    | 306.9       | 12G  | 0 |  |  |  | 316.2 | 10C | 1  | 375.2 | 8C  | 0 |
|         | N54.7    | 306.9       | 12G  | 0 |  |  |  |       |     |    |       |     |   |
|         | N54.8    | 307.0       | 12G  | 0 |  |  |  |       |     |    |       |     |   |
|         | N54.9    | 307.0       | 12G  | 0 |  |  |  |       |     |    |       |     |   |
| V54/2nd | N237.1   | 308.0       | 13G  | 1 |  |  |  | 316.2 | 10C | 1# | 375.3 | 8C  | 0 |
|         | N237.2   | 307.9       | 13G  | 1 |  |  |  | 316.1 | 10C | 1  | 375.2 | 8C  | 0 |
|         | N237.3   | 308.0       | 13G  | 1 |  |  |  | 316.2 | 10C | 1  | 375.3 | 8C  | 0 |
|         | N237.4   | 308.1       | 13G  | 1 |  |  |  | 316.0 | 10C | 1  | 375.5 | 8C  | 0 |
|         | N237.5   | 305.9       | 11G  | 0 |  |  |  | 316.1 | 10C | 1  | 375.5 | 8C  | 0 |
|         | N237.6   | 307.9       | 13G  | 1 |  |  |  | 316.1 | 10C | 1  | 375.5 | 8C  | 0 |
| V54/3rd | N343.1   | 305.9       | 11G  | 0 |  |  |  | 318.0 | 12C | 0# | 375.4 | 8C  | 0 |
|         | N343.2   | 306.9       | 12G  | 0 |  |  |  | 317.1 | 11C | 0  | 375.4 | 8C  | 0 |
|         | N343.3   | 305.9       | 11G  | 0 |  |  |  | 317.1 | 11C | 0  | 375.3 | 8C  | 0 |

|         |          |                  |           |   |  |  |       |      |    |       |     |    |
|---------|----------|------------------|-----------|---|--|--|-------|------|----|-------|-----|----|
|         | N343.4   | 306.0            | 11G       | 0 |  |  | 318.0 | 12C  | 0  | 375.4 | 8C  | 0  |
|         | N343.5   | 305.8            | 11G       | 0 |  |  | 317.0 | 11C  | 0  | 375.4 | 8C  | 0  |
|         | N343.6   | 308.1            | 13G       | 1 |  |  | 317.0 | 11C  | 0  | 376.4 | 9C  | 1  |
|         | N343.7   | 305.8            | 11G       | 0 |  |  |       |      |    |       |     |    |
|         | N343.8   | 304.9            | 10G       | 1 |  |  |       |      |    |       |     |    |
|         | N343.9   | 305.9            | 11G       | 0 |  |  |       |      |    |       |     |    |
|         | N343.10  | 307.0            | 12G       | 0 |  |  |       |      |    |       |     |    |
|         | N343.11  | 308.0            | 13G       | 1 |  |  |       |      |    |       |     |    |
|         | N343.12  | 304.9            | 10G       | 1 |  |  |       |      |    |       |     |    |
|         | N343.13  | 305.9            | 11G       | 0 |  |  |       |      |    |       |     |    |
|         | N343.14  | 304.8            | 10G       | 1 |  |  |       |      |    |       |     |    |
|         | N343.15  | 304.8            | 10G       | 1 |  |  |       |      |    |       |     |    |
|         | N343.16  | 308.0            | 13G       | 1 |  |  |       |      |    |       |     |    |
|         | N343.17  | 304.8            | 10G       | 1 |  |  |       |      |    |       |     |    |
|         | N343.18  | 306.0            | 11G       | 0 |  |  |       |      |    |       |     |    |
|         | N343.19  | 304.9            | 10G       | 1 |  |  |       |      |    |       |     |    |
|         | N343.20  | 305.8            | 11G       | 0 |  |  |       |      |    |       |     |    |
| V54/4th | Replaced |                  |           |   |  |  |       |      |    |       |     |    |
|         |          |                  |           |   |  |  |       |      |    |       |     |    |
| V58/1st | N58.1    |                  | 13G*      | 1 |  |  | 316.2 | 10C  | 1  | 377.9 | 11C | 0  |
|         | N58.2    | 307.9            | 13G       | 1 |  |  | 316.2 | 10C  | 1  | 378.0 | 11C | 0  |
|         | N58.3    | 308.0            | 13G       | 1 |  |  | 316.1 | 10C  | 1  | 378.0 | 11C | 0  |
|         | N58.4    | 308.0/307.0(1.2) | 13G*      | 1 |  |  | 316.1 | 10C  | 1  | 378.3 | 11C | 0  |
|         | N58.5    | 307.9            | 13G       | 1 |  |  | 316.0 | 10C  | 1  | 378.2 | 11C | 0  |
|         | N58.6    | 306.9=308.0(1.0) | 13G(12G*) | 1 |  |  | 316.1 | 10C  | 1  | 378.2 | 11C | 0  |
| V58/2nd | N240.1   | 308.0            | 13G       | 1 |  |  | 316.2 | 10C  | 1  | 378.0 | 11C | 0  |
|         | N240.2   | 307.9            | 13G       | 1 |  |  | 316.3 | 10C  | 1  | 377.8 | 11C | 0  |
| V58/3rd | Cleared  |                  |           |   |  |  |       |      |    |       |     |    |
| V58/4th | N429.1   | 306.9            | 12G       | 0 |  |  | 316.2 | 10C  | 1  | 378.0 | 11C | 0  |
|         | N429.2   | 307.0            | 12G       | 0 |  |  | 316.2 | 10C  | 1  | 378.0 | 11C | 0  |
|         | N429.3   | 306.9            | 12G       | 0 |  |  | 316.2 | 10C  | 1  | 378.0 | 11C | 0  |
|         | N429.4   | 307.0            | 12G       | 0 |  |  | 316.0 | 10C  | 1  | 378.3 | 11C | 0  |
|         | N429.5   | 306.9            | 12G       | 0 |  |  | 316.2 | 10C  | 1  | 378.2 | 11C | 0  |
|         | N429.6   | 307.0            | 12G       | 0 |  |  | 316.1 | 10C  | 1  | 378.2 | 11C | 0  |
|         |          |                  |           |   |  |  |       |      |    |       |     |    |
| V59/1st | N59.1    | 307.9            | 13G       | 1 |  |  | 316.2 | 10C* | 1# | 378.0 | 11C | 0# |
|         | N59.2    | 308.2            | 13G       | 1 |  |  | 316.2 | 10C  | 1  | 378.0 | 11C | 0  |
|         | N59.3    | 307.0            | 12G       | 0 |  |  | 316.2 | 10C  | 1  | 378.0 | 11C | 0  |



|         |          |       |     |   |  |  |       |     |   |       |     |   |
|---------|----------|-------|-----|---|--|--|-------|-----|---|-------|-----|---|
|         | N352.17  | 307.9 | 13G | 1 |  |  |       |     |   |       |     |   |
|         | N352.18  | 307.1 | 12G | 0 |  |  |       |     |   |       |     |   |
|         | N352.19  | 307.9 | 13G | 1 |  |  |       |     |   |       |     |   |
|         | N352.20  | 308.2 | 13G | 1 |  |  |       |     |   |       |     |   |
| V59/4th | N438.1   | 308.0 | 13G | 1 |  |  | 317.3 | 11C | 0 | 378.0 | 11C | 0 |
|         | N438.2   | 307.9 | 13G | 1 |  |  | 317.2 | 11C | 0 | 378.0 | 11C | 0 |
|         | N438.3   | 308.0 | 13G | 1 |  |  | 317.2 | 11C | 0 | 378.0 | 11C | 0 |
|         | N438.4   | 308.0 | 13G | 1 |  |  | 317.1 | 11C | 0 | 378.2 | 11C | 0 |
|         | N438.5   | 308.0 | 13G | 1 |  |  | 317.1 | 11C | 0 | 378.1 | 11C | 0 |
|         | N438.6   | 308.0 | 13G | 1 |  |  | 317.1 | 11C | 0 | 378.2 | 11C | 0 |
|         |          |       |     |   |  |  |       |     |   |       |     |   |
| V88/1st | N88.1.1  | 303.8 | 9G* | 0 |  |  | 316.2 | 10C | 1 | 375.3 | 8C  | 0 |
|         | N88.1.2  | 303.9 | 9G  | 0 |  |  | 316.1 | 10C | 1 | 375.3 | 8C  | 0 |
|         | N88.1.3  | 303.8 | 9G  | 0 |  |  | 316.2 | 10C | 1 | 375.3 | 8C  | 0 |
|         | N88.1.4  | 304.0 | 9G  | 0 |  |  | 316.2 | 10C | 1 | 375.3 | 8C  | 0 |
|         | N88.1.5  | 303.8 | 9G  | 0 |  |  | 316.1 | 10C | 1 | 375.3 | 8C  | 0 |
|         | N88.1.6  | 303.9 | 9G  | 0 |  |  | 316.2 | 10C | 1 | 375.2 | 8C  | 0 |
|         | N88.1.7  | 303.8 | 9G  | 0 |  |  |       |     |   |       |     |   |
|         | N88.1.8  | 303.8 | 9G  | 0 |  |  |       |     |   |       |     |   |
|         | N88.1.9  | 303.8 | 9G  | 0 |  |  |       |     |   |       |     |   |
|         | N88.1.10 | 303.7 | 9G  | 0 |  |  |       |     |   |       |     |   |
|         | N88.2    | 304.0 | 9G  | 0 |  |  |       |     |   |       |     |   |
|         | N88.3    | 303.8 | 9G  | 0 |  |  |       |     |   |       |     |   |
|         | N88.4    | 304.0 | 9G  | 0 |  |  |       |     |   |       |     |   |
|         | N88.5    | 303.9 | 9G  | 0 |  |  |       |     |   |       |     |   |
|         | N88.6    | 303.8 | 9G  | 0 |  |  |       |     |   |       |     |   |
|         | N88.7    | 304.0 | 9G  | 0 |  |  |       |     |   |       |     |   |
|         | N88.8    |       |     |   |  |  |       |     |   |       |     |   |
|         | N88.9    | 303.9 | 9G  | 0 |  |  |       |     |   |       |     |   |
| V88/2nd | N272.1   | 304.9 | 10G | 1 |  |  | 316.2 | 10C | 1 | 375.3 | 8C  | 0 |
|         | N272.2   | 304.9 | 10G | 1 |  |  | 316.2 | 10C | 1 | 375.3 | 8C  | 0 |
|         | N272.3   | 304.8 | 10G | 1 |  |  | 316.2 | 10C | 1 | 375.3 | 8C  | 0 |
|         | N272.4   | 304.9 | 10G | 1 |  |  | 316.0 | 10C | 1 | 375.3 | 8C  | 0 |
|         | N272.5   | 304.9 | 10G | 1 |  |  | 316.0 | 10C | 1 | 375.3 | 8C  | 0 |
|         | N272.6   | 304.9 | 10G | 1 |  |  | 316.1 | 10C | 1 | 375.2 | 8C  | 0 |
| V88/3rd | N369.1   | 305.0 | 10G | 1 |  |  | 316.2 | 10C | 1 | 375.2 | 8C  | 0 |
|         | N369.2   | 304.9 | 10G | 1 |  |  | 316.3 | 10C | 1 | 375.1 | 8C  | 0 |
|         | N369.3   | 304.9 | 10G | 1 |  |  | 316.3 | 10C | 1 | 375.1 | 8C  | 0 |
|         | N369.4   | 304.9 | 10G | 1 |  |  | 316.3 | 10C | 1 | 375.2 | 8C  | 0 |
|         | N369.5   | 304.9 | 10G | 1 |  |  | 316.3 | 10C | 1 | 375.2 | 8C  | 0 |

|          |         |                  |      |   |  |  |       |     |   |       |     |   |
|----------|---------|------------------|------|---|--|--|-------|-----|---|-------|-----|---|
|          | N369.6  | 304.9            | 10G  | 1 |  |  | 316.2 | 10C | 1 | 375.2 | 8C  | 0 |
|          | N369.7  | 304.9            | 10G  | 1 |  |  |       |     |   |       |     |   |
|          | N369.8  | 305.0            | 10G  | 1 |  |  |       |     |   |       |     |   |
|          | N369.9  | 304.8            | 10G  | 1 |  |  |       |     |   |       |     |   |
|          | N369.10 | 304.9            | 10G  | 1 |  |  |       |     |   |       |     |   |
|          | N369.11 | 304.8            | 10G  | 1 |  |  |       |     |   |       |     |   |
|          | N369.12 | 305.0            | 10G  | 1 |  |  |       |     |   |       |     |   |
|          | N369.13 | 304.8            | 10G  | 1 |  |  |       |     |   |       |     |   |
|          | N369.14 | 305.1            | 10G  | 1 |  |  |       |     |   |       |     |   |
|          | N369.15 | 304.9            | 10G  | 1 |  |  |       |     |   |       |     |   |
|          | N369.16 | 305.0            | 10G  | 1 |  |  |       |     |   |       |     |   |
|          | N369.17 | 304.9            | 10G  | 1 |  |  |       |     |   |       |     |   |
|          | N369.18 |                  |      |   |  |  |       |     |   |       |     |   |
|          | N369.19 | 304.9            | 10G  | 1 |  |  |       |     |   |       |     |   |
|          | N369.20 | 305.0            | 10G  | 1 |  |  |       |     |   |       |     |   |
| V88/4th  | N449.1  | 303.8            | 9G   | 0 |  |  | 316.3 | 10C | 1 | 375.4 | 8C  | 0 |
|          | N449.2  | 303.7            | 9G*  | 0 |  |  | 316.3 | 10C | 1 | 375.2 | 8C  | 0 |
|          | N449.3  | 303.7            | 9G   | 0 |  |  | 316.2 | 10C | 1 | 375.2 | 8C  | 0 |
|          | N449.4  | 303.8            | 9G   | 0 |  |  | 316.1 | 10C | 1 | 375.3 | 8C  | 0 |
|          | N449.5  | 303.8            | 9G   | 0 |  |  | 316.0 | 10C | 1 | 375.5 | 8C  | 0 |
|          | N449.6  | 303.8            | 9G   | 0 |  |  | 316.1 | 10C | 1 | 375.5 | 8C  | 0 |
|          |         |                  |      |   |  |  |       |     |   |       |     |   |
| V138/1st | N138.1  |                  | 13G  | 1 |  |  | 316.1 | 10C | 1 | 378.1 | 11C | 0 |
|          | N138.2  | 307.9            | 13G* | 1 |  |  | 316.2 | 10C | 1 | 378.0 | 11C | 0 |
|          | N138.3  | 308.0            | 13G  | 1 |  |  | 316.3 | 10C | 1 | 378.0 | 11C | 0 |
|          | N138.4  | 308.1>306.9(1.1) | 13G* | 1 |  |  | 316.0 | 10C | 1 | 378.2 | 11C | 0 |
|          | N138.5  | 307.0            | 12G  | 0 |  |  | 316.1 | 10C | 1 | 378.2 | 11C | 0 |
|          | N138.6  | 307.9=306.9(1.0) | 13G* | 1 |  |  | 316.1 | 10C | 1 | 378.2 | 11C | 0 |
| V138/2nd | N288.1  | 308.1            | 13G  | 1 |  |  | 316.2 | 10C | 1 | 378.0 | 11C | 0 |
|          | N288.2  | 307.9            | 13G  | 1 |  |  | 316.2 | 10C | 1 | 378.0 | 11C | 0 |
|          | N288.3  | 308.0            | 13G  | 1 |  |  | 316.3 | 10C | 1 | 378.1 | 11C | 0 |
|          | N288.4  | 306.9            | 12G  | 0 |  |  | 316.1 | 10C | 1 | 378.2 | 11C | 0 |
|          | N288.5  | 307.9/306.9(1.2) | 13G* | 1 |  |  | 316.1 | 10C | 1 | 378.2 | 11C | 0 |
|          | N288.6  | 308.0            | 13G  | 1 |  |  | 316.2 | 10C | 1 | 378.2 | 11C | 0 |
| V138/3rd | N331.1  | 308.1            | 13G  | 1 |  |  | 316.2 | 10C | 1 | 378.1 | 11C | 0 |
|          | N331.2  | 307.9            | 13G  | 1 |  |  | 316.2 | 10C | 1 | 378.0 | 11C | 0 |
|          | N331.3  | 308.0            | 13G  | 1 |  |  | 316.3 | 10C | 1 | 378.0 | 11C | 0 |
|          | N331.4  | 308.0            | 13G  | 1 |  |  | 316.0 | 10C | 1 | 378.2 | 11C | 0 |
|          | N331.5  | 308.0            | 13G  | 1 |  |  | 316.1 | 10C | 1 | 378.3 | 11C | 0 |
|          | N331.6  | 308.0            | 13G  | 1 |  |  | 316.1 | 10C | 1 | 378.2 | 11C | 0 |







|          |         |       |      |    |       |     |   |       |     |    |       |    |    |
|----------|---------|-------|------|----|-------|-----|---|-------|-----|----|-------|----|----|
|          | N333.8  | 355.7 | 10G  | 1  |       |     |   |       |     |    |       |    |    |
|          | N333.9  | 355.7 | 10G  | 1  |       |     |   |       |     |    |       |    |    |
|          | N333.10 | 355.6 | 10G  | 1  |       |     |   |       |     |    |       |    |    |
|          | N333.11 | 355.8 | 10G  | 1  |       |     |   |       |     |    |       |    |    |
|          | N333.12 | 355.6 | 10G  | 1  |       |     |   |       |     |    |       |    |    |
|          | N333.13 | 355.7 | 10G  | 1  |       |     |   |       |     |    |       |    |    |
|          | N333.14 | 355.6 | 10G  | 1  |       |     |   |       |     |    |       |    |    |
|          | N333.15 | 355.7 | 10G  | 1  |       |     |   |       |     |    |       |    |    |
|          | N333.16 | 355.7 | 10G  | 1  |       |     |   |       |     |    |       |    |    |
|          | N333.17 | 355.7 | 10G  | 1  |       |     |   |       |     |    |       |    |    |
|          | N333.18 | 355.5 | 10G  | 1  |       |     |   |       |     |    |       |    |    |
|          | N333.19 | 355.6 | 10G  | 1  |       |     |   |       |     |    |       |    |    |
|          | N333.20 | 355.7 | 10G  | 1  |       |     |   |       |     |    |       |    |    |
|          |         |       |      |    |       |     |   |       |     |    |       |    |    |
| V185/1st | N185.1  | 300.6 | 10G* | 1  | 428.9 | 10G | 0 | 316.0 | 10C | 1# | 374.3 | 7C | 0# |
|          | N185.2  | 300.6 | 10G  | 1  | 428.9 | 10G | 0 | 315.9 | 10C | 1  | 374.4 | 7C | 0  |
|          | N185.3  | 300.6 | 10G  | 1  | 428.8 | 10G | 0 | 316.0 | 10C | 1  | 374.5 | 7C | 0  |
|          | N185.4  | 300.6 | 10G  | 1  | 428.8 | 10G | 0 | 315.9 | 10C | 1  | 374.5 | 7C | 0  |
|          | N185.5  | 300.6 | 10G  | 1  | 428.8 | 10G | 0 | 316.0 | 10C | 1  | 374.5 | 7C | 0  |
|          | N185.6  | 300.7 | 10G  | 1  | 428.9 | 10G | 0 | 316.0 | 10C | 1  | 374.4 | 7C | 0  |
|          | N185.7  | 300.6 | 10G  | 1  |       |     |   |       |     |    |       |    |    |
|          | N185.8  | 300.6 | 10G  | 1  |       |     |   |       |     |    |       |    |    |
|          | N185.9  | 300.7 | 10G  | 1  |       |     |   |       |     |    |       |    |    |
|          | N185.10 | 300.6 | 10G  | 1  |       |     |   |       |     |    |       |    |    |
|          | N185.11 | 300.6 | 10G  | 1  |       |     |   |       |     |    |       |    |    |
|          | N185.12 | 300.6 | 10G  | 1  |       |     |   |       |     |    |       |    |    |
|          | N185.13 | 300.6 | 10G  | 1  |       |     |   |       |     |    |       |    |    |
|          | N185.14 | 300.6 | 10G  | 1  |       |     |   |       |     |    |       |    |    |
|          | N185.15 | 300.6 | 10G  | 1  |       |     |   |       |     |    |       |    |    |
|          | N185.16 | 300.6 | 10G  | 1  |       |     |   |       |     |    |       |    |    |
|          | N185.17 | 300.6 | 10G  | 1  |       |     |   |       |     |    |       |    |    |
|          | N185.18 | 300.6 | 10G  | 1  |       |     |   |       |     |    |       |    |    |
|          | N185.19 | 300.7 | 10G  | 1  |       |     |   |       |     |    |       |    |    |
|          | N185.20 | 300.5 | 10G  | 1  |       |     |   |       |     |    |       |    |    |
| V185/2nd | N306.1  | 300.5 | 10G  | 1# | 428.9 | 10G | 0 | 316.1 | 10C | 1  | 374.3 | 7C | 0  |
|          | N306.2  | 300.5 | 10G* | 1  | 428.8 | 10G | 0 | 315.9 | 10C | 1  | 374.5 | 7C | 0  |
|          | N306.3  | 300.6 | 10G  | 1  | 428.8 | 10G | 0 | 316.0 | 10C | 1  | 374.5 | 7C | 0  |
|          | N306.4  | 300.6 | 10G  | 1  | 428.9 | 10G | 0 | 316.0 | 10C | 1  | 374.5 | 7C | 0  |
|          | N306.5  | 300.5 | 10G  | 1  | 429.0 | 10G | 0 | 316.0 | 10C | 1  | 374.5 | 7C | 0  |
|          | N306.6  | 300.6 | 10G  | 1  | 428.8 | 10G | 0 | 316.0 | 10C | 1  | 374.4 | 7C | 0  |

|          |         |       |     |   |       |      |   |       |     |   |       |    |   |
|----------|---------|-------|-----|---|-------|------|---|-------|-----|---|-------|----|---|
| V185/4th | N456.1  | 300.5 | 10G | 1 | 428.8 | 10G  | 0 | 316.1 | 10C | 1 | 374.4 | 7C | 0 |
|          | N456.2  | 300.6 | 10G | 1 | 429.0 | 10G  | 0 | 316.0 | 10C | 1 | 374.4 | 7C | 0 |
|          | N456.3  | 300.7 | 10G | 1 | 428.8 | 10G  | 0 | 316.0 | 10C | 1 | 374.4 | 7C | 0 |
|          | N456.4  | 300.6 | 10G | 1 | 428.9 | 10G  | 0 | 315.9 | 10C | 1 | 374.5 | 7C | 0 |
|          | N456.5  | 300.6 | 10G | 1 | 428.9 | 10G  | 0 | 315.9 | 10C | 1 | 374.5 | 7C | 0 |
|          | N456.6  | 300.7 | 10G | 1 | 428.9 | 10G  | 0 | 316.0 | 10C | 1 | 374.5 | 7C | 0 |
|          | N456.7  | 300.6 | 10G | 1 |       |      |   |       |     |   |       |    |   |
|          | N456.8  | 300.6 | 10G | 1 |       |      |   |       |     |   |       |    |   |
|          | N456.9  | 300.7 | 10G | 1 |       |      |   |       |     |   |       |    |   |
|          | N456.10 | 300.6 | 10G | 1 |       |      |   |       |     |   |       |    |   |
|          | N456.11 | 300.6 | 10G | 1 |       |      |   |       |     |   |       |    |   |
|          | N456.12 | 300.6 | 10G | 1 |       |      |   |       |     |   |       |    |   |
|          | N456.13 | 300.6 | 10G | 1 |       |      |   |       |     |   |       |    |   |
|          | N456.14 | 300.6 | 10G | 1 |       |      |   |       |     |   |       |    |   |
|          | N456.15 | 300.5 | 10G | 1 |       |      |   |       |     |   |       |    |   |
|          | N456.16 | 300.7 | 10G | 1 |       |      |   |       |     |   |       |    |   |
|          | N456.17 | 300.7 | 10G | 1 |       |      |   |       |     |   |       |    |   |
|          | N456.18 | 300.6 | 10G | 1 |       |      |   |       |     |   |       |    |   |
|          | N456.19 | 300.7 | 10G | 1 |       |      |   |       |     |   |       |    |   |
|          | N456.20 | 300.6 | 10G | 1 |       |      |   |       |     |   |       |    |   |
|          |         |       |     |   |       |      |   |       |     |   |       |    |   |
| V113/1st | N113.1  | 354.8 | 9G* | 0 | 428.9 | 10G* | 0 | 314.0 | 8C  | 0 | 374.3 | 7C | 0 |
|          | N113.2  | 354.7 | 9G  | 0 | 428.9 | 10G  | 0 | 314.1 | 8C  | 0 | 374.1 | 7C | 0 |
|          | N113.3  | 354.7 | 9G  | 0 | 428.8 | 10G  | 0 | 314.1 | 8C  | 0 | 374.1 | 7C | 0 |
|          | N113.4  | 354.7 | 9G  | 0 | 428.9 | 10G  | 0 | 313.9 | 8C  | 0 | 374.6 | 7C | 0 |
|          | N113.5  | 354.8 | 9G  | 0 | 429.0 | 10G  | 0 | 313.9 | 8C  | 0 | 374.5 | 7C | 0 |
|          | N113.6  | 354.8 | 9G  | 0 | 428.9 | 10G  | 0 | 314.0 | 8C  | 0 | 374.5 | 7C | 0 |
| V113/2nd | N281.1  | 355.7 | 10G | 1 | 429.0 | 10G  | 0 | 314.1 | 8C  | 0 | 374.2 | 7C | 0 |
|          | N281.2  | 355.7 | 10G | 1 | 428.9 | 10G  | 0 | 314.0 | 8C  | 0 | 374.1 | 7C | 0 |
|          | N281.3  | 355.7 | 10G | 1 | 428.9 | 10G  | 0 | 314.1 | 8C  | 0 | 374.2 | 7C | 0 |
|          | N281.4  | 355.8 | 10G | 1 | 428.8 | 10G  | 0 | 314.0 | 8C  | 0 | 374.4 | 7C | 0 |
|          | N281.5  | 354.7 | 9G  | 0 | 428.8 | 10G  | 0 | 314.0 | 8C  | 0 | 374.5 | 7C | 0 |
|          | N281.6  | 354.8 | 9G  | 0 | 428.9 | 10G  | 0 | 314.0 | 8C  | 0 | 374.4 | 7C | 0 |
|          |         |       |     |   |       |      |   |       |     |   |       |    |   |
| V115/1st | N115.1  | 355.7 | 10G | 1 | 428.8 | 10G  | 0 | 314.0 | 8C  | 0 | 374.3 | 7C | 0 |
|          | N115.2  | 355.7 | 10G | 1 | 428.9 | 10G  | 0 | 314.0 | 8C  | 0 | 374.2 | 7C |   |
|          | N115.3  | 355.7 | 10G | 1 | 429.0 | 10G  | 0 | 314.0 | 8C  | 0 | 374.2 | 7C |   |
|          | N115.4  | 355.7 | 10G | 1 | 428.9 | 10G  | 0 | 314.0 | 8C  | 0 | 374.5 | 7C | 0 |
|          | N115.5  | 355.7 | 10G | 1 | 429.0 | 10G  | 0 | 314.0 | 8C  | 0 | 374.5 | 7C | 0 |
|          | N115.6  | 355.7 | 10G | 1 | 428.8 | 10G  | 0 | 313.9 | 8C  | 0 | 374.5 | 7C | 0 |

|          |        |       |      |    |       |     |   |       |      |    |       |     |    |
|----------|--------|-------|------|----|-------|-----|---|-------|------|----|-------|-----|----|
| V115/2nd | N282.1 | 355.7 | 10G  | 1  | 428.9 | 10G | 0 | 314.1 | 8C   | 0  | 374.3 | 7C  | 0  |
|          | N282.2 | 355.7 | 10G  | 1  | 428.9 | 10G | 0 | 314.0 | 8C   | 0  | 374.3 | 7C  | 0  |
|          | N282.3 | 355.8 | 10G  | 1# | 428.8 | 10G | 0 | 314.0 | 8C   | 0  | 374.2 | 7C  | 0  |
|          | N282.4 | 355.7 | 10G  | 1  | 428.9 | 10G | 0 | 313.9 | 8C   | 0  | 374.5 | 7C  | 0  |
|          | N282.5 | 355.7 | 10G  | 1  | 428.9 | 10G | 0 | 314.0 | 8C   | 0  | 374.4 | 7C  | 0  |
|          | N282.6 | 355.7 | 10G  | 1  | 428.8 | 10G | 0 | 314.0 | 8C   | 0  | 374.5 | 7C  | 0  |
|          |        |       |      |    |       |     |   |       |      |    |       |     |    |
| Cc167    |        |       |      |    |       |     |   |       |      |    |       |     |    |
| V64/1st  | N64.1  | 352.9 | 10G* | 1  |       |     |   | 316.0 | 10C  | 1  | 373.4 | 6C  | 1  |
|          | N64.2  | 352.8 | 10G  | 1  |       |     |   | 316.0 | 10C  | 1  | 373.4 | 6C  | 1  |
|          | N64.3  | 352.8 | 10G  | 1  |       |     |   | 316.0 | 10C  | 1  | 373.3 | 6C  | 1  |
|          | N64.4  | 352.7 | 10G  | 1  |       |     |   | 315.9 | 10C  | 1  | 373.7 | 6C  | 1  |
|          | N64.5  | 352.8 | 10G  | 1  |       |     |   | 315.9 | 10C  | 1  | 373.6 | 6C  | 1  |
|          | N64.6  | 352.7 | 10G  | 1  |       |     |   | 316.0 | 10C  | 1  | 373.6 | 6C  | 1  |
| V64/2nd  | N257.1 | 352.8 | 10G  | 1  |       |     |   | 316.1 | 10C  | 1  | 373.4 | 6C  | 1  |
|          | N257.2 | 352.7 | 10G  | 1  |       |     |   | 316.1 | 10C  | 1  | 373.3 | 6C  | 1  |
|          | N257.3 | 352.7 | 10G  | 1  |       |     |   | 316.0 | 10C  | 1  | 373.3 | 6C  | 1  |
|          | N257.4 | 352.8 | 10G  | 1  |       |     |   | 315.9 | 10C  | 1  | 373.6 | 6C  | 1  |
|          | N257.5 | 352.8 | 10G  | 1  |       |     |   | 316.0 | 10C  | 1  | 373.6 | 6C  | 1  |
|          | N257.6 | 352.8 | 10G  | 1  |       |     |   | 316.0 | 10C  | 1  | 373.5 | 6C  | 1  |
| V64/3rd  | N348.1 | 352.8 | 10G  | 1  |       |     |   | 316.1 | 10C  | 1  | 373.4 | 6C  | 1  |
|          | N348.2 | 352.7 | 10G  | 1  |       |     |   | 316.0 | 10C  | 1  | 373.4 | 6C  | 1  |
|          | N348.3 | 352.7 | 10G  | 1  |       |     |   | 316.1 | 10C  | 1  | 373.3 | 6C  | 1  |
|          | N348.4 | 352.8 | 10G  | 1  |       |     |   | 316.0 | 10C  | 1  | 373.6 | 6C  | 1  |
|          | N348.5 | 352.8 | 10G  | 1  |       |     |   | 316.0 | 10C  | 1  | 373.6 | 6C  | 1  |
|          | N348.6 | 352.7 | 10G  | 1  |       |     |   | 316.0 | 10C  | 1  | 373.6 | 6C  | 1  |
|          |        |       |      |    |       |     |   |       |      |    |       |     |    |
| V117/1st | N117.1 | 352.8 | 10G  | 1  |       |     |   | 316.1 | 10C* | 1# | 373.5 | 6C* | 1# |
|          | N117.2 | 352.8 | 10G  | 1  |       |     |   | 316.1 | 10C  | 1  | 373.3 | 6C  | 1  |
| V117/2nd | N284.1 | 352.8 | 10G  | 1  |       |     |   | 316.1 | 10C  | 1  | 373.3 | 6C  | 1  |
|          | N284.2 | 352.8 | 10G  | 1  |       |     |   | 316.0 | 10C  | 1  | 373.4 | 6C  | 1  |
|          | N284.3 | 352.7 | 10G  | 1  |       |     |   | 316.0 | 10C  | 1  | 373.3 | 6C  | 1  |
|          | N284.4 | 352.8 | 10G  | 1  |       |     |   | 316.0 | 10C  | 1  | 373.5 | 6C  | 1  |
|          | N284.5 | 352.8 | 10G  | 1  |       |     |   | 315.9 | 10C  | 1  | 373.7 | 6C  | 1  |
|          | N284.6 | 352.7 | 10G  | 1  |       |     |   | 315.9 | 10C  | 1  | 373.7 | 6C  | 1  |
| V117/3rd | N332.1 | 352.8 | 10G  | 1  |       |     |   | 316.1 | 10C  | 1  | 373.4 | 6C  | 1  |
|          | N332.2 | 352.7 | 10G  | 1  |       |     |   | 316.1 | 10C  | 1  | 373.3 | 6C  | 1  |
|          | N332.3 | 353.8 | 10G  | 1  |       |     |   | 316.1 | 10C  | 1  | 373.3 | 6C  | 1  |
|          | N332.4 | 352.8 | 10G  | 1  |       |     |   | 316.0 | 10C  | 1  | 373.6 | 6C  | 1  |
|          | N332.5 | 352.8 | 10G  | 1  |       |     |   | 315.9 | 10C  | 1  | 373.6 | 6C  | 1  |

|          |             |       |     |   |  |  |  |                  |     |    |       |    |   |
|----------|-------------|-------|-----|---|--|--|--|------------------|-----|----|-------|----|---|
|          | N332.6      | 352.8 | 10G | 1 |  |  |  | 315.9            | 10C | 1  | 373.7 | 6C | 1 |
| V117/4th | N417.1      | 352.8 | 10G | 1 |  |  |  | 315.0            | 9C* | 0# | 373.4 | 6C | 1 |
|          | N417.2      | 352.7 | 10G | 1 |  |  |  | 315.0            | 9C  | 0  | 373.4 | 6C | 1 |
|          | N417.3      | 351.8 | 9G* | 0 |  |  |  | 315.1            | 9C  | 0  | 373.4 | 6C | 1 |
|          | N417.4      | 351.8 | 9G  | 0 |  |  |  | 315.1            | 9C  | 0  | 373.5 | 6C | 1 |
|          | N417.5      | 351.8 | 9G  | 0 |  |  |  | 315.0            | 9C  | 0  | 373.6 | 6C | 1 |
|          | N417.6      | 351.8 | 9G  | 0 |  |  |  | 314.9            | 9C  | 0  | 373.6 | 6C | 1 |
|          |             |       |     |   |  |  |  |                  |     |    |       |    |   |
| V124/1st | N124.1      | 352.8 | 10G | 1 |  |  |  | 316.0            | 10C | 1  | 373.4 | 6C | 1 |
|          | N124.2      | 352.8 | 10G | 1 |  |  |  | 316.0            | 10C | 1  | 373.3 | 6C | 1 |
|          | N124.3      | 352.8 | 10G | 1 |  |  |  | 316.0            | 10C | 1  | 373.4 | 6C | 1 |
|          | N124.4      | 352.8 | 10G | 1 |  |  |  | 315.9            | 10C | 1  | 373.7 | 6C | 1 |
|          | N124.5      | 352.8 | 10G | 1 |  |  |  | 316.0            | 10C | 1  | 373.6 | 6C | 1 |
|          | N124.6      | 352.8 | 10G | 1 |  |  |  | 316.0            | 10C | 1  | 373.6 | 6C | 1 |
| V124/2nd | N290.1      | 352.8 | 10G | 1 |  |  |  | 316.0            | 10C | 1  | 373.4 | 6C | 1 |
|          | N290.2      | 352.8 | 10G | 1 |  |  |  | 315.9            | 10C | 1  | 373.4 | 6C | 1 |
|          | N290.3      | 352.8 | 10G | 1 |  |  |  | 316.1            | 10C | 1  | 373.3 | 6C | 1 |
|          | N290.4      | 352.8 | 10G | 1 |  |  |  | 315.9            | 10C | 1  | 373.6 | 6C | 1 |
|          | N290.5      | 352.7 | 10G | 1 |  |  |  | 315.9            | 10C | 1  | 373.7 | 6C | 1 |
|          | N290.6      | 352.8 | 10G | 1 |  |  |  | 315.9            | 10C | 1  | 373.6 | 6C | 1 |
| V124/3rd | N336.1      | 352.8 | 10G | 1 |  |  |  | 316.1            | 10C | 1  | 373.3 | 6C | 1 |
|          | N336.2      | 352.7 | 10G | 1 |  |  |  | 316.0            | 10C | 1  | 373.3 | 6C | 1 |
|          | N336.3      | 352.7 | 10G | 1 |  |  |  | 315.9            | 10C | 1  | 373.4 | 6C | 1 |
|          | N336.4      | 352.8 | 10G | 1 |  |  |  | 315.9            | 10C | 1  | 373.6 | 6C | 1 |
|          | N336.5      | 352.8 | 10G | 1 |  |  |  | 316.0            | 10C | 1  | 373.6 | 6C | 1 |
|          | N336.6      | 352.8 | 10G | 1 |  |  |  | 316.0            | 10C | 1  | 373.6 | 6C | 1 |
|          |             |       |     |   |  |  |  |                  |     |    |       |    |   |
| cc23     |             |       |     |   |  |  |  |                  |     |    |       |    |   |
| V69/1st  | Non-carrier |       |     |   |  |  |  |                  |     |    |       |    |   |
| V69/2nd  | N258.1      | 352.8 | 10G | 1 |  |  |  | 318.0            | 12C | 0# | 374.3 | 7C | 0 |
|          | N258.2      | 352.8 | 10G | 1 |  |  |  | 318.0            | 12C | 0  | 374.4 | 7C | 0 |
|          | N258.3      | 352.8 | 10G | 1 |  |  |  | 318.0            | 12C | 0  | 374.3 | 7C | 0 |
|          | N258.4      | 352.7 | 10G | 1 |  |  |  | 317.9            | 12C | 0  | 374.5 | 7C | 0 |
|          | N258.5      | 352.8 | 10G | 1 |  |  |  | 318.0            | 12C | 0  | 374.5 | 7C | 0 |
|          | N258.6      | 352.8 | 10G | 1 |  |  |  | 318.0            | 12C | 0  | 374.5 | 7C | 0 |
| V69/3rd  | No sample   |       |     |   |  |  |  |                  |     |    |       |    |   |
| V69/4th  | N431.1      | 352.8 | 10G | 1 |  |  |  | 319.0>318.1(1.2) | 13C | 1# | 374.3 | 7C | 0 |
|          | N431.2      | 352.8 | 10G | 1 |  |  |  | 318.0>319.0(1.0) | 12C | 0  | 374.3 | 7C | 0 |

|         |             |             |      |    |  |  |  |                  |     |    |       |    |   |
|---------|-------------|-------------|------|----|--|--|--|------------------|-----|----|-------|----|---|
|         | N431.3      | 352.8       | 10G  | 1  |  |  |  | 318.0>318.9(1.1) | 12C | 0  | 374.4 | 7C | 0 |
|         | N431.4      | 352.8       | 10G  | 1  |  |  |  | 319.0>317.9(1.1) | 13C | 1  | 374.4 | 7C | 0 |
|         | N431.5      | 352.8       | 10G  | 1  |  |  |  | 318.9>318.0(1.1) | 13C | 1  | 374.5 | 7C | 0 |
|         | N431.6      | 352.8       | 10G  | 1  |  |  |  | 318.9>317.9(1.2) | 13C | 1  | 374.6 | 7C | 0 |
|         |             |             |      |    |  |  |  |                  |     |    |       |    |   |
| V93/1st | Non-carrier |             |      |    |  |  |  |                  |     |    |       |    |   |
| V93/2nd | N264.1      | 352.8       | 10G  | 1  |  |  |  | 316.1            | 10C | 1  | 374.3 | 7C | 0 |
|         | N264.2      | 352.8       | 10G  | 1  |  |  |  | 316.1            | 10C | 1  | 374.2 | 7C | 0 |
|         | N264.3      | 352.6       | 10G  | 1  |  |  |  | 316.1            | 10C | 1  | 374.3 | 7C | 0 |
|         | N264.4      | 352.6       | 10G  | 1  |  |  |  | 315.9            | 10C | 1  | 374.6 | 7C | 0 |
|         | N264.5      | 352.7       | 10G  | 1  |  |  |  | 315.9            | 10C | 1  | 374.6 | 7C | 0 |
|         | N264.6      | 352.7       | 10G  | 1  |  |  |  | 315.9            | 10C | 1  | 374.6 | 7C | 0 |
| V93/3rd | N359.1      | 352.5       | 10G  | 1  |  |  |  | 316.1            | 10C | 1  | 374.3 | 7C | 0 |
|         | N359.2      | 352.7       | 10G  | 1  |  |  |  | 316.1            | 10C | 1  | 374.3 | 7C | 0 |
|         | N359.3      | 352.6       | 10G  | 1  |  |  |  | 316.1            | 10C | 1  | 374.3 | 7C | 0 |
|         | N359.4      | 352.8       | 10G  | 1  |  |  |  | 315.9            | 10C | 1  | 374.5 | 7C | 0 |
|         | N359.5      | 352.7       | 10G  | 1  |  |  |  | 315.9            | 10C | 1  | 374.6 | 7C | 0 |
|         | N359.6      | 352.6       | 10G  | 1  |  |  |  | 315.9            | 10C | 1  | 374.6 | 7C | 0 |
|         |             |             |      |    |  |  |  | 316.1            | 10C | 1  | 374.3 | 7C | 0 |
| V96/1st | Non-carrier |             |      |    |  |  |  |                  |     |    |       |    |   |
| V96/2nd | N259.1      | 352.8       | 10G  | 1  |  |  |  | 318.1            | 12C | 0  | 374.2 | 7C | 0 |
|         | N259.2      | 352.7       | 10G  | 1  |  |  |  | 318.1            | 12C | 0  | 374.2 | 7C | 0 |
|         | N259.3      | 352.8       | 10G  | 1  |  |  |  | 315.1            | 9C  | 0  | 374.2 | 7C | 0 |
|         | N259.4      | 352.7       | 10G  | 1# |  |  |  | 317.8            | 12C | 0  | 374.6 | 7C | 0 |
|         | N259.5      | 352.7       | 10G  | 1  |  |  |  | 318.0            | 12C | 0  | 374.6 | 7C | 0 |
|         | N259.6      | 352.7       | 10G  | 1  |  |  |  | 316.0            | 10C | 1  | 374.6 | 7C | 0 |
| V96/3rd | N370.1      | 353.7       | 11G  | 0  |  |  |  | 316.1            | 10C | 1  | 374.3 | 7C | 0 |
|         | N370.2      | 351.7       | 9G*  | 0  |  |  |  | 317.1>316.1(1.2) | 11C | 0  | 374.3 | 7C | 0 |
|         | N370.3      | 351.7       | 9G   | 0  |  |  |  | 316.0            | 10C | 1  | 374.3 | 7C | 0 |
|         | N370.4      | 353.7       | 11G  | 0# |  |  |  | 316.0            | 10C | 1  | 374.6 | 7C | 0 |
|         | N370.5      | 353.7       | 11G  | 0# |  |  |  | 315.9            | 10C | 1  | 374.6 | 7C | 0 |
|         | N370.6      | 353.8       | 11G  | 0  |  |  |  | 316.0            | 10C | 1  | 374.6 | 7C | 0 |
| V96/4th | N445.1      | 356.6>355.6 | 14G* | 0  |  |  |  | 315.2            | 9C  | 0# | 374.4 | 7C | 0 |
|         | N445.2      | 355.6>354.6 | 13G* | 1  |  |  |  | 315.0            | 9C  | 0  | 374.3 | 7C | 0 |
|         | N445.3      | 355.6>354.6 | 13G* | 1  |  |  |  | 315.0            | 9C  | 0  | 374.3 | 7C | 0 |
|         | N445.4      | 354.7>353.6 | 12G* | 0  |  |  |  | 315.0            | 9C  | 0  | 374.6 | 7C | 0 |
|         | N445.5      | 353.7       | 11G  | 0  |  |  |  | 315.0            | 9C  | 0  | 374.5 | 7C | 0 |
|         | N445.6      | 354.6       | 12G  | 0# |  |  |  | 314.9            | 9C  | 0  | 374.6 | 7C | 0 |



|          |         |       |     |    |       |    |   |            |     |   |            |    |   |
|----------|---------|-------|-----|----|-------|----|---|------------|-----|---|------------|----|---|
|          | N176.14 | 304.6 | 10G | 1  |       |    |   |            |     |   |            |    |   |
|          | N176.15 | 304.6 | 10G | 1  |       |    |   |            |     |   |            |    |   |
|          | N176.16 | 304.6 | 10G | 1  |       |    |   |            |     |   |            |    |   |
|          | N176.17 | 304.6 | 10G | 1  |       |    |   |            |     |   |            |    |   |
|          | N176.18 | 304.6 | 10G | 1  |       |    |   |            |     |   |            |    |   |
|          | N176.19 | 304.6 | 10G | 1  |       |    |   |            |     |   |            |    |   |
|          | N176.20 | 304.6 | 10G | 1  |       |    |   |            |     |   |            |    |   |
| V176/2nd | N318.1  | 304.5 | 10G | 1  | 428.4 | 9G | 1 | 316.1      | 10C | 1 | 376.2      | 9C | 1 |
|          | N318.2  | 304.6 | 10G | 1  | 428.3 | 9G | 1 | 316.1      | 10C | 1 | 376.1      | 9C | 1 |
|          | N318.3  | 304.5 | 10G | 1  | 428.3 | 9G | 1 | 316.1      | 10C | 1 | 376.1      | 9C | 1 |
|          | N318.4  | 304.5 | 10G | 1  | 428.4 | 9G | 1 | No PRODUCT |     |   | No PRODUCT |    |   |
|          | N318.5  | 304.6 | 10G | 1  | 428.3 | 9G | 1 | 316.0      | 10C | 1 | 376.3      | 9C | 1 |
|          | N318.6  | 304.5 | 10G | 1# | 428.3 | 9G | 1 | 315.9      | 10C | 1 | 376.4      | 9C | 1 |
| V176/3rd | N399.1  | 304.6 | 10G | 1  | 428.3 | 9G | 1 | 316.0      | 10C | 1 | 376.1      | 9C | 1 |
|          | N399.2  | 304.6 | 10G | 1  | 428.2 | 9G | 1 | 316.1      | 10C | 1 | 376.1      | 9C | 1 |
|          | N399.3  | 304.5 | 10G | 1  | 428.1 | 9G | 1 | 316.0      | 10C | 1 | 376.1      | 9C | 1 |
|          | N399.4  | 304.6 | 10G | 1  | 428.3 | 9G | 1 | 316.0      | 10C | 1 | 376.2      | 9C | 1 |
|          | N399.5  | 304.6 | 10G | 1  | 428.3 | 9G | 1 | 316.0      | 10C | 1 | 376.4      | 9C | 1 |
|          | N399.6  | 304.5 | 10G | 1  | 428.3 | 9G | 1 | 315.9      | 10C | 1 | 376.4      | 9C | 1 |
| V176/4th | N408.1  | 304.5 | 10G | 1  | 428.2 | 9G | 1 | 316.1      | 10C | 1 | 376.1      | 9C | 1 |
|          | N408.2  | 304.5 | 10G | 1  | 428.3 | 9G | 1 | 316.1      | 10C | 1 | 376.2      | 9C | 1 |
|          | N408.3  | 304.6 | 10G | 1  | 428.1 | 9G | 1 | 316.1      | 10C | 1 | 376.0      | 9C | 1 |
|          | N408.4  | 304.6 | 10G | 1  | 428.4 | 9G | 1 | 315.9      | 10C | 1 | 376.4      | 9C | 1 |
|          | N408.5  | 304.6 | 10G | 1  | 428.3 | 9G | 1 | 315.9      | 10C | 1 | 376.5      | 9C | 1 |
|          | N408.6  | 304.6 | 10G | 1  | 428.2 | 9G | 1 | 315.9      | 10C | 1 | 376.4      | 9C | 1 |

<sup>1</sup>Fragment size is given for the primary peak where the ratio of primary to secondary peak was >1.2. Where the ratio was <1.2 then the sizes of both peaks are given with the ratio in brackets and the size of the largest peak was utilised for determining tract length; <sup>2</sup>Asterisks indicates that the tract length was confirmed by sequencing. <sup>3</sup>Expression states were determined by Western blotting for marked (#) isolates. For genes with tracts within the reading frame, the coding was 2 for ON and 0 for OFF. Shading indicates genes that have different GeneScan sizes/tract lengths relative to the majority type in the first time point.



Table A4. Overview of Expression States of for the Phase Variable Genes

| Repeat Tract              | <i>fetA</i> <sup>1</sup> |        |             |             |          |
|---------------------------|--------------------------|--------|-------------|-------------|----------|
|                           | cc174                    | cc60   | cc23        | cc167       | cc32     |
|                           | F3-7                     | F1-7   | F4-1        | F1-3        | F5-1     |
| 6C(modified) <sup>2</sup> |                          | 2 (4)  |             |             |          |
| 8C                        | 0 (2)                    |        |             |             | 0 (1)    |
| 9C                        | 2 (2)                    |        |             |             | 2 (3)    |
| 10C                       | 2 (1)                    |        |             | 2 (2)       | 2 (1)    |
| 11C                       | 1 (1)                    |        | 1 (1)       | 1 (1)       |          |
| 12C                       | 0 (1)                    |        | 0 (2)       | 0 (3)       |          |
| 13C                       |                          |        | 0 (2)       | 0 (1)       |          |
| 14C                       |                          |        |             |             |          |
|                           | <i>porA</i> <sup>1</sup> |        |             |             |          |
|                           | cc174                    | cc60   | cc23        | cc167       | cc32     |
|                           | P1.21,16                 | P1.5,2 | P1.5-1,10-1 | P1.5-1,10-1 | P1.19,15 |
| 10G                       |                          |        | 1 (1)       | 1           |          |
| 11G                       | 2 (1)                    | 0?     | 2 (1)       | 2 (3)       | 2 (4)    |
| 12G                       | 2 (2)                    | 1 (1)  | 2 (2)       | 2 (2)       | 2 (1)    |
| 13G                       | 2 (1)                    | 2 (3)  | 1 (1)       |             | 2        |
| 14G                       | 1 (1)                    | 2 (1)  | 1 (1)       |             |          |
| 15G                       | 1                        |        | 1 (1)       |             |          |
| 16G                       | 0 (1)                    |        | 1 (1)       |             |          |
| >17G                      | 0 (1)                    |        |             |             |          |
|                           | <i>opc</i> <sup>1</sup>  |        |             |             |          |
|                           | cc174                    | cc60   | cc23        | cc167       | cc32     |
|                           |                          |        |             |             |          |
| 8C                        |                          | 0 (1)  |             |             |          |
| 9C                        | 0 (3)                    |        |             |             |          |
| 10C                       | 0 (2)                    |        |             |             | 0        |
| 11C                       | 1 (1)                    |        |             |             |          |
| 12C                       | 2 (2)                    | 2 (1)  | 2 (1)       | 2 (1)       |          |
| 13C                       |                          | 2 (1)  | 2 (2)       | 2 (2)       | 2 (1)    |
| 14C                       |                          | 1 (1)  | 1 (1)       | 1 (2)       | 1 (1)    |
| 15C                       |                          | 1 (1)  | 1 (1)       | 1 (1)       | 0 (1)    |

| >15C                     | 0 (2) |       | 0 (2)      |      |
|--------------------------|-------|-------|------------|------|
| <i>nadA</i> <sup>1</sup> |       |       |            |      |
|                          | cc174 | cc32  |            |      |
| 9TAAA                    | 0 (1) | 0 (1) |            |      |
| 10TAAA                   |       |       |            |      |
| 11TAAA                   | 1     |       |            |      |
| 12TAAA                   | 0 (4) |       |            |      |
| 13TAAA                   | 2 (1) |       |            |      |
| 14TAAA                   | 2 (1) |       |            |      |
| <i>hpuA</i> <sup>1</sup> |       |       |            |      |
|                          | cc174 | cc60  | cc167/cc23 | cc32 |
| 9G                       | 0     | 0     | 0          |      |
| 10G                      | 2(1)  | 2(4)  | 2(2)       | 2(3) |
| 11G                      | 0(1)  | 0     | 0(2)       |      |
| 12G                      | 0(1)  |       | 0(1)       |      |
| 13G                      | 2(3)  |       | 2          |      |
| 14G                      | 0(1)  |       | 0          |      |
| 15G                      | 0     |       |            |      |

<sup>1</sup>Expression states were determined on the basis of Western blots probed with antigen specific antisera. For promoter located repeats (i.e. *fetA*, *porA* and *opc*), three relative expression states were coded as follows:- 2, high; 1, intermediate; 0, low or undetectable. For tracts in the reading frame (i.e. *hpu*) expression states were coded as:- 2, ON; 0, OFF. numbers in brackets are the numbers of samples analysed;<sup>2</sup> the tract in this gene is 6G but the spacing of the promoter elements is equivalent to a tract with a high level expression.

Table A5. Quantification of Protein Expression

| Data source                |          | Repeat Number |   |        |        |        |        |        |        |        |        |        |  |
|----------------------------|----------|---------------|---|--------|--------|--------|--------|--------|--------|--------|--------|--------|--|
| Western blots <sup>2</sup> | Strain   | 6             | 7 | 8      | 9      | 10     | 11     | 12     | 13     | 14     | 15     | >15    |  |
| FetA <sup>1</sup>          |          |               |   |        |        |        |        |        |        |        |        |        |  |
| Fig.2\$                    | cc174    |               |   | 0.0(2) | 0.8(1) | 1.0(1) |        | 0.1(1) |        |        |        |        |  |
| F2 <sup>3</sup>            | cc174    |               |   |        | 1.0(1) |        |        |        |        |        |        |        |  |
| F3 <sup>3</sup>            | cc174    |               |   |        |        |        |        |        |        |        |        |        |  |
| Fig.S3\$                   | cc60     | 0.9(4)        |   |        |        |        |        |        |        |        |        |        |  |
| Fig.S4\$                   | cc167    |               |   |        |        | 1.0(1) |        | 0.1(3) | 0.0(1) |        |        |        |  |
| Fig.S5\$                   | cc23     |               |   |        |        |        | 1.0(1) | 0.2(2) | 0.1(2) |        |        |        |  |
| Fig.S6\$                   | cc32     |               |   | 0.1(1) | 1.2(3) | 1.0(1) |        |        |        |        |        |        |  |
| F2                         | cc167    |               |   |        |        | 1.0(1) | 0.3(1) |        |        |        |        |        |  |
| PorA                       |          |               |   |        |        |        |        |        |        |        |        |        |  |
| Fig.2\$                    | cc174    |               |   |        |        |        | 1.0(1) | 0.9(2) | 0.6(1) | 0.6(1) |        | 0.3(2) |  |
| P2 <sup>3</sup>            | cc174    |               |   |        |        |        | 1.0(1) | 1.1(1) |        | 0.7(1) |        | 0.2(1) |  |
| Fig.S3\$                   | cc60     |               |   |        |        |        |        | 0.4(1) | 0.7(3) | 0.6(1) |        |        |  |
| P2 <sup>3</sup>            | cc60     |               |   |        |        |        |        |        | 1.1(3) |        |        |        |  |
| P3 <sup>3</sup>            | cc60     |               |   |        |        |        |        | 0.2(2) | 1.1(2) |        |        |        |  |
| Fig.S4\$                   | cc167    |               |   |        |        |        | 1.1(3) | 1.1(2) |        |        |        |        |  |
| Fig.S5£                    | cc32     |               |   |        |        |        | 1.0(3) |        |        |        |        |        |  |
| Fig.S6\$                   | cc32     |               |   |        |        |        | 1.0(1) | 1.0(1) |        |        |        |        |  |
| Fig.S7\$                   | cc167/23 |               |   |        |        | 1.2(1) | 1.0(2) | 0.9(2) | 0.5(1) | 0.5(1) |        |        |  |
| P3                         | cc23     |               |   |        |        | 0.8(1) | 1.0(1) |        |        |        |        |        |  |
| Opc                        |          |               |   |        |        |        |        |        |        |        |        |        |  |
| Fig.2\$                    | cc174    |               |   |        | 0.0(2) | 0.0(3) | 0.6(1) | 1.0(1) |        |        |        |        |  |
| O2 <sup>3</sup>            | cc174    |               |   |        | 0.1(3) | 0.1(2) | 0.7(1) | 1.0(1) |        |        |        |        |  |
| Fig.S3\$                   | cc60     |               |   | 0.0(1) |        |        |        | 1.0(1) | 0.7(1) | 0.1(1) | 0.1(1) |        |  |
| Fig.S4\$                   | cc 167   |               |   |        |        |        |        | 1.0(1) | 0.7(1) | 0.3(2) |        |        |  |
| Fig.S6£                    | cc 32    |               |   |        |        |        |        |        | 1.0(1) | 0.1(1) | 0.0(1) | 0.0(2) |  |
| Fig.S6\$                   | cc167/23 |               |   |        |        |        |        | 1.0(1) | 0.7(3) |        | 0.0(2) | 0.0(1) |  |
| NadA                       |          |               |   |        |        |        |        |        |        |        |        |        |  |
| Fig2\$                     | cc174    |               |   |        | 0.0(1) |        |        | 0.1(4) | 0.7(1) | 1.0(1) |        |        |  |
| N2 <sup>3</sup>            | cc174    |               |   |        | 0.0(1) |        | 0.6(1) | 0.3(1) |        | 1.0(1) |        |        |  |

<sup>1</sup>Fold expression levels are provided relative to the sample with the highest value and are an average of all samples with an identical tract length on that particular gel (n, number of samples of each type); <sup>2</sup>data from these blots has been adjusted for loading relative to RecA (\$) or fHBP (£); <sup>3</sup>from data not shown.

Table A6. Expression States for Individual Phase Variable Genes

| Gene              | Expression State <sup>1</sup> | Time Point |     |     |     | Total (%) |
|-------------------|-------------------------------|------------|-----|-----|-----|-----------|
|                   |                               | 1st        | 2nd | 3rd | 4th |           |
| Hpu               | ON(2)                         | 11         | 16  | 10  | 6   | 43(66%)   |
|                   | OFF(0)                        | 6          | 2   | 4   | 2   | 14(22%)   |
|                   | Mix                           | 1          | 3   | 2   | 2   | 8(12%)    |
| HmbR              | ON(2)                         | 1          | 1   | 1   | 1   | 4(24%)    |
|                   | OFF(0)                        | 5          | 5   | 1   | 1   | 12(71%)   |
|                   | Mix                           | 0          | 0   | 1   | 0   | 1(5%)     |
| PorA              | High(2)                       | 16         | 20  | 14  | 9   | 59(91%)   |
|                   | Int(1)                        | 2          | 0   | 0   | 0   | 2(3%)     |
|                   | Low(0)                        | 0          | 1   | 1   | 0   | 2(3%)     |
|                   | Mix                           | 0          | 0   | 1   | 1   | 2(3%)     |
| PorA<br>(11G Int) | High(2)                       | 11         | 15  | 7   | 4   | 37(57%)   |
|                   | Int(1)                        | 5          | 4   | 6   | 5   | 20(31%)   |
|                   | Low(0)                        | 0          | 1   | 0   | 0   | 1(2%)     |
|                   | Mix                           | 2          | 1   | 3   | 1   | 7(11%)    |
| FetA <sup>2</sup> | High(2)                       | 9          | 9   | 3   | 1   | 22(42%)   |
|                   | Int(1)                        | 2          | 3   | 1   | 2   | 8(15%)    |
|                   | Low(0)                        | 1          | 2   | 3   | 4   | 10(19%)   |
|                   | Mix                           | 1          | 2   | 7   | 2   | 12(23%)   |
| Opc               | High(2)                       | 2          | 4   | 4   | 2   | 12(18%)   |
|                   | Int(1)                        | 7          | 1   | 2   | 0   | 10(15%)   |
|                   | Low(0)                        | 7          | 12  | 8   | 7   | 34(52%)   |
|                   | Mix                           | 2          | 4   | 2   | 1   | 9(14%)    |
| NadA              | High(2)                       | 2          | 0   | 0   | 0   | 2(7%)     |
|                   | Int(1)                        | 1          | 0   | 0   | 0   | 1(4%)     |
|                   | Low(0)                        | 5          | 6   | 6   | 4   | 21(78%)   |
|                   | Mix                           | 0          | 2   | 1   | 0   | 3(11%)    |
| NalP              | ON(1)                         | 13         | 13  | 11  | 5   | 42(65%)   |
|                   | OFF(0)                        | 5          | 7   | 5   | 4   | 21(32%)   |
|                   | Mix                           | 0          | 1   | 0   | 1   | 2(3%)     |

|      |        |    |    |    |   |         |
|------|--------|----|----|----|---|---------|
| MspA | ON(1)  | 4  | 4  | 4  | 2 | 14(22%) |
|      | OFF(0) | 14 | 17 | 12 | 8 | 51(78%) |

---

<sup>1</sup>Strains are considered to be in a particular expression state in a specific sample if 80% or more of the isolates are in the same expression state otherwise a time point is defined as mixed. <sup>2</sup>Excludes the data for the non-variable FetA of the cc60 isolates.

Table A7. Transcriptional Expression Levels for PorA Phase Variants

| Volunteer    | Isolate<br>(repeat no.) | Individual Experiment <sup>1</sup> |     |     |     |     | Average | sd  | cv  |
|--------------|-------------------------|------------------------------------|-----|-----|-----|-----|---------|-----|-----|
|              |                         | A                                  | B   | C   | D   | E   |         |     |     |
| <b>cc174</b> |                         |                                    |     |     |     |     |         |     |     |
| V54          | N54.1 (14G)             | 0.6                                | 0.9 | 0.8 | 1.0 | 0.9 | 0.8     | 0.1 | 0.2 |
| V58          | N58.1 (11G)             | 1.4                                | 1.4 | 1.6 | 2.5 | 2.1 | 1.8     | 0.5 | 0.3 |
| V59          | N59.1 (12G)             | 2.1                                | 2.1 | 2.5 | 2.9 | 2.6 | 2.4     | 0.4 | 0.2 |
| V59          | N352.1(12G)             | 4.6                                | 1.7 | 1.9 | 2.8 | 2.2 | 2.6     | 1.2 | 0.4 |
| V58          | N240.1(12G)             | 2.5                                | 2.6 | 1.6 | 3.3 | 1.9 | 2.4     | 0.7 | 0.3 |
| V54          | N343.1(17G)             | 0.3                                | 0.1 | 0.1 | 0.2 | 0.2 | 0.2     | 0.1 | 0.4 |
| <b>cc60</b>  |                         |                                    |     |     |     |     |         |     |     |
| V114         | N114.1(12G)             | 1.1                                | 0.2 | 0.2 | 0.4 | 0.2 | 0.4     | 0.4 | 1.0 |
| V114         | N330.1(13G)             | 2.1                                | 0.5 | 0.4 | 0.9 | 0.5 | 0.9     | 0.7 | 0.8 |

<sup>1</sup>Values are relative quantification (RQ) adjusted to a control (H44/76 *porA* 18 bp spacer with a G12 Tract) and with GDH as an internal loading control.

Table A8. Numbers of each phasotype at different time points in persistent carriers of four groups of meningococcal strains

| Phasotype Score                          | Phasotype     | Time Point |     |     |     |
|------------------------------------------|---------------|------------|-----|-----|-----|
|                                          |               | 1st        | 2nd | 3rd | 4th |
| cc174 (FetA-Opc-NadA-Hpu-PorA-NalP-MspA) |               |            |     |     |     |
| 10                                       | 2-1-2-2-1-2-0 | 0          | 1   | 0   | 0   |
| 10                                       | 2-0-2-2-2-2-0 | 5          | 1   | 0   | 0   |
| 9                                        | 2-1-0-2-2-2-0 | 4          | 0   | 0   | 0   |
| 8                                        | 2-1-2-0-1-2-0 | 6          | 0   | 0   | 0   |
| 8                                        | 2-0-2-2-0-2-0 | 0          | 3   | 0   | 0   |
| 8                                        | 2-0-2-0-2-2-0 | 1          | 1   | 0   | 0   |
| 8                                        | 2-0-0-2-2-2-0 | 17         | 18  | 14  | 0   |
| 7                                        | 2-1-2-0-0-2-0 | 0          | 1   | 0   | 0   |
| 7                                        | 2-1-0-0-2-2-0 | 2          | 0   | 0   | 0   |
| 7                                        | 2-0-1-0-2-2-0 | 6          | 0   | 0   | 0   |
| 7                                        | 1-0-2-2-2-0-0 | 0          | 0   | 3   | 0   |
| 7                                        | 1-0-0-2-2-2-0 | 0          | 0   | 4   | 0   |
| 6                                        | 2-0-2-0-2-0-0 | 0          | 0   | 1   | 0   |
| 6                                        | 2-0-0-2-2-0-0 | 0          | 6   | 0   | 3   |
| 6                                        | 2-0-0-2-0-2-0 | 0          | 1   | 0   | 0   |
| 6                                        | 2-0-0-0-2-2-0 | 7          | 7   | 6   | 6   |
| 6                                        | 0-0-0-2-2-2-0 | 0          | 1   | 0   | 6   |
| 5                                        | 1-0-0-2-2-0-0 | 0          | 0   | 0   | 2   |
| 5                                        | 0-1-0-2-0-0-2 | 0          | 0   | 1   | 0   |
| 4                                        | 2-0-0-0-2-0-0 | 0          | 0   | 2   | 0   |
| 4                                        | 0-0-0-2-2-0-0 | 0          | 0   | 0   | 1   |
| 4                                        | 0-0-0-0-2-2-0 | 0          | 0   | 1   | 6   |
| 2                                        | 2-0-0-0-0-0-0 | 0          | 0   | 1   | 0   |
| 1                                        | 0-1-0-0-0-0-0 | 0          | 0   | 1   | 0   |
| 0                                        | 0-0-0-0-0-0-0 | 0          | 0   | 2   | 0   |
|                                          | Total         | 48         | 40  | 36  | 24  |
| cc60 (FetA-Opc-HmbR-Hpu-PorA-NalP-MspA)  |               |            |     |     |     |
| 8                                        | 2-2-2-0-2-0-0 | 0          | 0   | 2   | 0   |
| 8                                        | 2-2-0-2-2-0-0 | 0          | 11  | 5   | 0   |
| 8                                        | 2-0-0-2-2-2-0 | 6          | 6   | 0   | 6   |
| 7                                        | 2-2-0-2-1-0-0 | 0          | 1   | 0   | 0   |
| 7                                        | 2-1-0-2-2-0-0 | 5          | 4   | 1   | 0   |
| 6                                        | 2-2-0-0-2-0-0 | 9          | 8   | 4   | 0   |
| 6                                        | 2-1-0-2-1-0-0 | 2          | 0   | 0   | 0   |
| 6                                        | 2-0-0-2-2-0-0 | 0          | 0   | 0   | 0   |
| 5                                        | 2-2-0-0-1-0-0 | 4          | 0   | 0   | 0   |
| 5                                        | 2-1-0-0-2-0-0 | 4          | 0   | 0   | 0   |



|                                                 | Total         | 30 | 30 | 12 | 6  |
|-------------------------------------------------|---------------|----|----|----|----|
| <b>cc167/cc23 (FetA-Opc-Hpu-PorA-NalP-MspA)</b> |               |    |    |    |    |
| 12                                              | 2-2-2-2-2-2   | 1  | 0  | 0  | 0  |
| 11                                              | 2-1-2-2-2-2   | 3  | 1  | 0  | 0  |
| 11                                              | 1-2-2-2-2-2   | 0  | 3  | 2  | 0  |
| 10                                              | 1-2-2-1-2-2   | 0  | 1  | 0  | 0  |
| 10                                              | 1-1-2-2-2-2   | 4  | 0  | 3  | 0  |
| 9                                               | 1-2-2-2-2-0   | 0  | 0  | 2  | 2  |
| 9                                               | 0-1-2-2-2-2   | 6  | 8  | 9  | 0  |
| 8                                               | 1-2-2-1-2-0   | 0  | 0  | 0  | 2  |
| 8                                               | 1-1-2-2-2-0   | 0  | 2  | 1  | 0  |
| 8                                               | 0-2-2-2-2-2   | 0  | 5  | 4  | 0  |
| 8                                               | 0-2-2-2-2-0   | 0  | 0  | 3  | 0  |
| 8                                               | 0-2-2-2-0-2   | 0  | 0  | 0  | 2  |
| 7                                               | 1-2-2-2-0-0   | 4  | 0  | 0  | 3  |
| 7                                               | 1-0-2-2-2-0   | 0  | 1  | 0  | 0  |
| 6                                               | 1-2-0-1-2-0   | 0  | 0  | 1  | 0  |
| 6                                               | 1-1-2-2-0-0   | 0  | 1  | 0  | 0  |
| 6                                               | 1-1-0-2-0-2   | 0  | 0  | 0  | 1  |
| 6                                               | 0-2-2-2-0-0   | 0  | 0  | 0  | 1  |
| 6                                               | 0-0-2-2-2-0   | 0  | 4  | 0  | 0  |
| 5                                               | 1-1-0-1-2-0   | 0  | 0  | 1  | 0  |
| 5                                               | 1-0-2-2-0-0   | 2  | 16 | 6  | 5  |
| 5                                               | 0-2-0-1-2-0   | 0  | 0  | 1  | 0  |
| 5                                               | 0-1-0-2-0-2   | 0  | 0  | 0  | 3  |
| 4                                               | 0-2-0-2-0-0   | 0  | 0  | 0  | 2  |
| 4                                               | 0-1-0-1-2-0   | 0  | 0  | 2  | 0  |
| 3                                               | 0-2-0-1-0-0   | 0  | 0  | 0  | 2  |
| 3                                               | 0-0-2-1-0-0   | 0  | 0  | 0  | 1  |
| 2                                               | 0-1-0-1-0-0   | 0  | 0  | 1  | 0  |
|                                                 | Total         | 20 | 42 | 36 | 24 |
| <b>cc32 (FetA-Opc-NadA-Hpu-PorA-NalP-MspA)</b>  |               |    |    |    |    |
| 12                                              | 2-2-0-2-2-2-2 | 1  | 2  | 0  | 0  |
| 11                                              | 2-1-0-2-2-2-2 | 1  | 1  | 1  | 1  |
| 10                                              | 2-0-0-2-2-2-2 | 4  | 2  | 2  | 2  |
| 9                                               | 0-1-0-2-2-2-2 | 0  | 0  | 3  | 3  |
| 6                                               | 2-0-0-2-2-0-0 | 0  | 1  | 0  | 0  |
|                                                 | Total         | 6  | 6  | 6  | 6  |

Table A9. Antigen-specific antibody concentrations for individual meningococcal carriers

| Volunteer/Clone<br>type/PorA<br>type/Other <sup>1</sup> | Antigen/Antibody<br>type | Antibody Concentrations/SBA Titres |       |       |       | Change |
|---------------------------------------------------------|--------------------------|------------------------------------|-------|-------|-------|--------|
|                                                         |                          | 1st                                | 2nd   | 3rd   | 4th   |        |
| Persistent/Interrupted                                  |                          |                                    |       |       |       |        |
| V51/cc174<br>/P1.21,16                                  | P1.21,16/IgG             | 9.32                               | 23.58 | 76.08 | 25.07 | 2.7    |
|                                                         | Other P1/IgG             | 0.44                               | 0.59  | 1.80  | 0.91  | -      |
|                                                         | P1.7,16/IgG              | 8.97                               | 4.46  | 12.09 | 10.22 | 1.1    |
|                                                         | Other P1/IgG             | 1.54                               | 3.15  | 6.75  | 3.36  | -      |
|                                                         | CapY/IgG                 | 0.9                                | ND    | ND    | 8.6   | 9.8    |
|                                                         | CapY/SBA                 | 8192                               | 4096  | 8192  | 4096  | 0.5    |
| V58/cc174<br>/P1.21,16                                  | P1.21,16/IgG             | 32.75                              | 40.69 | 29.01 | 9.12  | 0.3    |
|                                                         | Other P1/IgG             | 7.57                               | 8.53  | 5.87  | 2.59  | -      |
|                                                         | P1.7,16/IgG              | 1.34                               | 2.28  | 1.09  | 1.58  | 1.2    |
|                                                         | Other P1/IgG             | 23.01                              | 52.08 | 31.58 | 26.35 | -      |
|                                                         | CapY/IgG                 | 3.5                                | ND    | ND    | 2.0   | 0.6    |
|                                                         | CapY/SBA                 | 4096                               | 4096  | 2048  | 2048  | 0.5    |
|                                                         | fHBP (B) <sup>3</sup>    | 1.29                               | 23.9  | 33.04 | ND    | 26.0   |
| V59/cc174<br>/P1.21,16                                  | P1.21,16/IgG             | 0                                  | 0     | 0     | 0     | -      |
|                                                         | Other P1/IgG             | 0.06                               | 1.36  | 2.03  | 0.4   | -      |
|                                                         | P1.7,16/IgG              | 0                                  | ND    | ND    | 0.2   | -      |
|                                                         | Other P1/IgG             | 2.88                               | ND    | ND    | 2.84  | -      |
|                                                         | CapY/IgG                 | 20.5                               | ND    | ND    | 6.5   | 0.3    |
|                                                         | CapY/SBA                 | 4096                               | 8192  | 4096  | 2048  | 0.5    |
| V88/cc174<br>/P1.21,16                                  | P1.21,16/IgG             | 0.02                               | 0     | 2.07  | 4.13  | 179.3  |
|                                                         | Other P1/IgG             | 0                                  | 11.06 | 0     | 0.09  | -      |
|                                                         | P1.7,16/IgG              | 0.51                               | 0     | 0     | 1.45  | 2.8    |
|                                                         | Other P1/IgG             | 0.51                               | 0     | 3.09  | 0.64  | -      |
|                                                         | CapY/IgG                 | 0.9                                | ND    | ND    | 27.5  | 31.2   |
|                                                         | CapY/SBA                 | 256                                | 16384 | 16384 | 4096  | 16.0   |
| V114                                                    | P1.5,2/IgG               | 3.47                               | 5.43  | 1.31  | ND    | 0.4    |
|                                                         | P1.5,2-2/IgG             | 3.01                               | 7.05  | 1.63  | ND    | 0.5    |
|                                                         | Other P1/IgG             | 2.77                               | 5.93  | 1.01  | ND    | -      |

|                              |                   |      |       |      |      |                 |
|------------------------------|-------------------|------|-------|------|------|-----------------|
| V115                         | P1.5,2/IgG        | 3.74 | 7.91  | 7.31 | ND   | 2.0             |
|                              | P1.5,2-2/IgG      | 2.01 | 4.27  | 3.49 | ND   | 1.7             |
|                              | Other P1/IgG      | 9.01 | 10.15 | 9.54 | ND   | -               |
| V117/cc167<br>/P1.5-1,10-1   | P1.5-2,10/IgG     | 2.18 | 2.68  | 2.78 | 3.11 | 1.4             |
|                              | P1.5,2/IgG        | 1.18 | 1.05  | 0.96 | 1.47 | 1.2             |
|                              | Other P1/IgG      | 0.73 | 0.42  | 0.39 | 0.15 | -               |
|                              | CapY/IgG          | 11.3 | ND    | ND   | 12.6 | 1.1             |
|                              | CapY/SBA          | 4096 | 4096  | 4096 | 2048 | 0.5             |
| V96/cc23/2nd<br>/P1.5-1,10-1 | P1.5-2,10/IgG     | ND   | 0.95  | 4.28 | 3.05 | 3.2             |
|                              | P1.5,2/IgG        | ND   | 1.92  | 1.28 | 1.95 | 1.0             |
|                              | Other P1/IgG      | ND   | 1.25  | 0.49 | 1.96 | -               |
|                              | CapY/IgG          | ND   | 11.2  | 13.5 | 7.8  | 0.7             |
|                              | CapY/SBA          | ND   | 4096  | 2048 | 1024 | 0.3             |
| V134                         |                   |      |       |      |      |                 |
|                              |                   |      |       |      |      |                 |
| V222/cc23<br>/P1.5-1,10-1    | P1.5-2,10/IgG     | 1.52 | 1.90  | 1.86 | 3.32 | 2.2             |
|                              | P1.5,2/IgG        | 1.24 | 0.23  | 0.37 | 1.46 | 1.2             |
|                              | Other P1/IgG      | 1.58 | 0.26  | 0.38 | 2.38 | -               |
|                              | CapY/IgG          | 14.2 | ND    | ND   | 9.9  | 0.7             |
|                              | CapY/SBA          | 4096 | 2048  | 2048 | 1024 | 0.3             |
| V176/cc32<br>/P1.19,15       | P1.19,15/IgG      | 0    | 0.08  | 0.25 | 0.27 | -               |
|                              | P1.19-1,15-11/IgG | 0    | 0.13  | 0.32 | 0.42 | -               |
|                              | Other P1/IgG      | 1.02 | 0.76  | 0.54 | 0.38 | -               |
| Combined<br>(-V88)           | PorA              | NR   | NR    | NR   | NR   | 2.1<br>(SD 1.2) |
|                              | CapY/IgG          | 6.3  | ND    | ND   | 6.9  | 1.0<br>(SD 3.7) |
|                              | CapY/SBA          | 4705 | 4096  | 3250 | 1825 | 0.4<br>(SD 0.1) |
| Acquisition of Carriage      |                   |      |       |      |      |                 |
| V81/cc174/4th<br>/P1.21,16   | P1.7,16/IgG       | ND   | ND    | 0.01 | 1.59 | 159             |
|                              | Other P1/IgG      | ND   | ND    | 0.33 | 1.69 |                 |

|                                 |                       |       |       |        |       |       |
|---------------------------------|-----------------------|-------|-------|--------|-------|-------|
|                                 | CapY/IgG              | ND    | ND    | 2.2    | 47.8  | 21.9  |
|                                 | CapY/SBA              | ND    | 1025  | 512    | 2048  | 2.0   |
| V50/cc60/2nd/<br>P1.5,2         | P1.5,2/IgG            | 0.37  | ND    | 2.05   | 12.07 | 32.6  |
|                                 | P1.5,2-2/IgG          | 0.11  | 0.07  | 0.56   | 3.16  | 28.7  |
|                                 | Other P1/IgG          | 0.49  | 0.36  | 0.33   | 0.52  | -     |
| V215/cc174/2nd<br>/P1.21,16     | CapY/IgG              | 0.3   | 3.0   | ND     | ND    | 9.8   |
|                                 | CapY/SBA              | 512   | 2048  | ND     | ND    | 4.0   |
| V70/cc1157/3rd/<br>4thCR        | P1.7,16/IgG           | 0.35  | 0.20  | 3.82   | 1.87  | 5.3   |
|                                 | Other P1/IgG          | 0.68  | 0.97  | 1.71   | 2.19  | -     |
|                                 | fHBP (B) <sup>3</sup> | 2.33  | 42.85 | 327.25 | ND    | 141.0 |
| V100/cc1157/3rd                 | P1.7,16/IgG           | 0.37  | 0.29  | 1.00   | 3.82  | 10.3  |
|                                 | Other P1/IgG          | 0.41  | 0.37  | 0.98   | 1.05  | -     |
| V69/cc23/2nd<br>/P1.5-1,10-1    | P1.5-2,10/IgG         | 1.02  | 0.53  | ND     | 5.09  | 5.0   |
|                                 | P1.5,2/IgG            | 0.75  | 0.34  | ND     | 1.72  | 2.3   |
|                                 | Other P1/IgG          | 0.54  | 0.27  | ND     | 0.59  |       |
|                                 | CapY/IgG              | 8.6   | 7.5   | ND     | 38.1  | 4.5   |
|                                 | CapY/SBA              | 3     | 128   | ND     | 1024  | 341   |
| V83/cc23/2nd<br>/P1.5-1,10-1    | CapY/IgG              | 0.1   | 1.8   | ND     | ND    | 15.9  |
|                                 | CapY/SBA              | 3     | 8192  | ND     | ND    | 2731  |
|                                 | fHBP (A) <sup>3</sup> | 2.91  | 8.22  | ND     | ND    | 3.0   |
| V93/cc23/2nd<br>/P1.5-1,10-1    | P1.5-2,10/IgG         | 0.71  | 0.30  | 0.30   | ND    | 0.4   |
|                                 | P1.5,2/IgG            | 0.37  | 0.26  | 0.30   | ND    | 0.8   |
|                                 | Other P1/IgG          | 0.23  | 0.20  | 0.21   | ND    | -     |
|                                 | CapY/IgG              | 38.5  | ND    | 29.8   | ND    | 0.8   |
|                                 | CapY/SBA              | 16384 | ND    | 16384  | ND    | 1.0   |
|                                 | fHBP (A) <sup>3</sup> | 12.52 | 10.09 | 6.72   | ND    | 0.5   |
| V186/cc22<br>P1.5-1,2-2/4th     | P1.5,2/IgG            | 0.3   | ND    | 0.3    | 11.3  | 37.6  |
|                                 | P1.5,2-2/IgG          | 0.02  | ND    | 0.02   | 5.30  | 265.0 |
|                                 | Other P1/IgG          | 0.33  | ND    | 0.46   | 8.62  | -     |
|                                 | CapY/IgG              | ND    | ND    | 0.2    | 18.3  | 107.8 |
|                                 | CapY/SBA              | 3     | ND    | 128    | 4096  | 1032  |
| V209/cc103<br>/P1.5-1,10-46/3rd | CapY/IgG              | ND    | 0.1   | ND     | 7.0   | 70.0  |
|                                 | CapY/SBA              | ND    | 256   | 8192   | 4096  | 16.0  |

|                                           |              | Pre-Colonisation |       | Post-Colonisation |       | Fold              |
|-------------------------------------------|--------------|------------------|-------|-------------------|-------|-------------------|
| Combined                                  | PorA         |                  | NR    |                   | NR    | 8.2<br>(SD 6.3)   |
|                                           | CapY/IgG     |                  | 0.9   |                   | 10.4  | 13.6<br>(SD 35.3) |
|                                           | CapY/SBA     |                  | 164   |                   | 3710  | 19.8<br>(SD 544)  |
| Clearance                                 |              |                  |       |                   |       |                   |
| V52/cc174<br>/P1.21,16/4th                | P21,16/IgG   | 15.33            | 2.34  | 8.76              | ND    | 0.6               |
|                                           | P1.7,16/IgG  | 0                | ND    | 15.3              | ND    | -                 |
|                                           | Other P1/IgG | 19.9             | 5.63  | 2.17              | ND    |                   |
|                                           | CapY/IgG     | ND               | ND    | 13.1              | 5.9   | (0.5)             |
|                                           | CapY/SBA     | 4096             | ND    | 2048              | 256   | 0.1               |
| V112/cc1157<br>/P1.21-7,16/4th            | P1.7,16/IgG  | 10.59            | ND    | 8.23              | 7.70  | 0.7<br>(0.9)      |
|                                           | Other P1/IgG | 0.41             | ND    | 0.21              | 0.10  |                   |
| V43/cc174<br>/P1.21,16/4th                | P1.21,16/IgG | 1.35             | 2.17  | 8.26              | 1.17  | 0.9<br>(0.1)      |
|                                           | Other P1/IgG | 3.29             | 1.72  | 1.23              | 0.27  |                   |
|                                           | P1.7,16/IgG  | 1.95             | 1.74  | 5.36              | 8.86  | 3.0<br>(1.2)      |
|                                           | Other P1/IgG | 7.14             | 6.10  | 2.49              | 3.22  |                   |
|                                           | CapY/IgG     | 0.3              | ND    | 17.1              | 10.5  | 35.0<br>(0.6)     |
|                                           | CapY/SBA     | 1024             | ND    | 4096              | 512   | 0.5<br>(0.1)      |
| Clonal Replacement                        |              |                  |       |                   |       |                   |
| V54/cc174<br>/P1.21,16/4th<br>(P1.18-1,3) | P1.21,16/IgG | 40.45            | 11.48 | 19.62             | 12.70 | 0.3<br>(0.6)      |
|                                           | Other P1/IgG | 0                | 0.13  | 0                 | 0     |                   |
|                                           | P1.7,16/IgG  | 83.71            | 44.41 | 41.72             | 30.76 | 0.4<br>(0.7)      |
|                                           | Other P1/IgG | 0                | 0     | 0.58              | 0.21  |                   |

|                                               |               |                    |                |                |                             |                         |
|-----------------------------------------------|---------------|--------------------|----------------|----------------|-----------------------------|-------------------------|
|                                               | CapY/IgG      | ND                 | ND             | 0.4            | 0.6                         | (1.5)                   |
|                                               | CapY/SBA      | 3                  | ND             | 128            | 32                          | 10.7<br>(0.3)           |
| V138/cc174<br>/P1.21,16/4th<br>(P1.5,2)       | P1.21,16/IgG  | 0                  | 0.17           | 0              | 0                           | -                       |
|                                               | Other P1/IgG  | 0                  | 0.47           | 0              | 0                           | -                       |
|                                               | P1.7,16/IgG   | 0                  | 0.06           | 0.86           | 0.77                        | (0.9)                   |
|                                               | Other P1/IgG  | 0                  | 0              | 0.18           | 0.07                        | -                       |
|                                               | CapY/IgG      | ND                 | ND             | 2.2            | 2.1                         | (1.0)                   |
|                                               | CapY/SBA      | 4096               | ND             | 2048           | 2048                        | 0.5<br>(1.0)            |
| V64/cc167<br>/P1.5-1,10-1/4th<br>(P1.17,9)    | P1.5-2,10/IgG | 0.48               | 2.21           | 17.18          | 8.04                        | 21.7<br>(0.5)           |
|                                               | P1.5,2/IgG    | 0.36               | 0.19           | 1.30           | 1.50                        | 4.2<br>(1.2)            |
|                                               | Other P1/IgG  | 0.33               | 0.04           | 0.36           | 0.24                        | -                       |
|                                               | CapY/IgG      | ND                 | ND             | 68.6           | 67.3                        | (1.0)                   |
|                                               | CapY/SBA      | ND                 | 16384          | 8192           | 8192                        | (1.0)                   |
| V124/cc167<br>/P1.5-1,10-1/4th<br>(P1.7,30)   | P1.5-2,10/IgG | 6.84               | 2.75           | 9.76           | 2.8                         | 0.4<br>(0.3)            |
|                                               | P1.5,2/IgG    | 0                  | 0              | 0              | 0.28                        | 0                       |
|                                               | Other P1/IgG  | 4.80               | 4.96           | 8.80           | 11.54                       | -                       |
|                                               | CapY/IgG      | ND                 | ND             | 6.4            | 4.4                         | (0.7)                   |
|                                               | CapY/SBA      | 8192               | ND             | 4096           | ND                          | 0.5                     |
| V140/ST6798<br>P1.5-1,10-26/4th<br>(P1.22,14) | P1.5-2,10/IgG | 0.61               | ND             | 0.55           | 0.49                        | 0.8<br>(0.9)            |
|                                               | P1.5,2/IgG    | 1.24               | ND             | 1.12           | 1.37                        | 1.1<br>(1.2)            |
|                                               | Other P1/IgG  | 1.15               | ND             | 0.85           | 1.13                        | -                       |
| Combined (CI +<br>CR)                         | PorA          | Titre<br>(1st/2nd) | Titre<br>(3rd) | Titre<br>(4th) | Fold<br>(1st/2nd<br>to 3rd) | Fold<br>(3rd to<br>4th) |
|                                               |               | NR                 | NR             | NR             | 2.5<br>(SD4.5)              | 0.6<br>(SD 0.4)         |

|             |               |      |      |      |               |                |
|-------------|---------------|------|------|------|---------------|----------------|
|             | CapY/IgG      | ND   | 6.7  | 5.3  | ND            | 0.7<br>(SD0.2) |
|             | CapY/SBA      | 1465 | 2048 | 588  | 1.5<br>(SD17) | 0.3<br>(SD0.5) |
| Non-Carrier |               |      |      |      |               |                |
| V41         | PorA/Set1/All | ND   | ND   | ND   | ND            | ND             |
|             | PorA/Set2/All | 0.3  | ND   | ND   | ND            | ND             |
|             | CapY/IgG      | 0.3  | ND   | ND   | 0.2           | 0.7            |
|             | CapY/SBA      | 3    | 3    | ND   | 128           | 43             |
| V42         | PorA/Set1/All | 0.18 | 0.09 | 0.18 | ND            | 1.0            |
|             | PorA/Set2/All | ND   | ND   | ND   | 0             | ND             |
| V57         | PorA/Set1/All | 0.3  | ND   | ND   | ND            | ND             |
|             | CapY/IgG      | 0.1  | ND   | ND   | 0.2           | 1.6            |
|             | CapY/SBA      | 3    | ND   | ND   | 4             | 1.3            |
| V87         | PorA/Set1/All | 0.45 | 0.32 | 0.41 | ND            | 1.0            |
|             | CapY/IgG      | 0.2  | ND   | ND   | 0.2           | 1.2            |
|             | CapY/SBA      | 3    | 3    | ND   | 3             | 1.0            |
| V89         | CapY/IgG      | 0.3  | ND   | ND   | 0.3           | 1.0            |
|             | CapY/SBA      | 3    | 3    | ND   | 3             | 1.0            |
| V97         | CapY/IgG      | 0.2  | ND   | ND   | 0.2           | 0.9            |
|             | CapY/SBA      | 128  | 256  | ND   | 512           | 4.0            |
| V103        | PorA/Set1/All | 0.16 | 0.11 | 0.12 | ND            | 0.8            |
| V125        | PorA/Set1/All | ND   | ND   | ND   | 0.94          | 1.1            |
| V135        | CapY/IgG      | 1.3  | ND   | ND   | 1.3           | 1.0            |
| V150        | CapY/IgG      | 9.5  | ND   | ND   | 8.4           | 0.9            |
| V172        | PorA/Set1/All | 0.19 | 0.20 | ND   | 0.21          | 1.0            |
|             | CapY/IgG      | 0.3  | ND   | ND   | 0.2           | 0.7            |
|             | CapY/SBA      | 3    | ND   | 3    | 3             | 1.0            |
| V196        | CapY/IgG      | 0.2  | ND   | ND   | 0.2           | 0.7            |
|             | CapY/SBA      | 3    | ND   | 8    | 3             | 1.0            |
| V202        | PorA/Set1/All | 0.07 | 0.02 | 0.12 | ND            | 1.7            |
|             | CapY/IgG      | 0.1  | ND   | ND   | 0.1           | 1.0            |
|             | CapY/SBA      | 3    | 3    | ND   | 3             | 1.0            |

|          |                 |      |      |      |      |                 |
|----------|-----------------|------|------|------|------|-----------------|
| V225     | PorA/Set1/All   | 0.41 | 0.60 | 0.47 | ND   | 1.1             |
|          | PorA            | 0.23 | 0.22 | 0.26 | 0.21 | 1.1<br>(SD 0.3) |
| Combined | CapY/IgG(-V150) | 0.2  | ND   | ND   | 0.4  | 1.0<br>(SD 0.4) |
|          | CapY/SBA        | 5    | 7    | 5    | 9    | 2.0<br>(SD 15)  |

<sup>1</sup>Other, time of acquisition or clearance/clonal replacement (CR) are indicated plus the PorA type for CR strain; <sup>2</sup>Data for this carrier was removed from statistical analysis as the CapY IgG and SBA levels were high prior to acquisition indicated a failure to detect carriage in the earlier time points rather than acquisition of carriage; <sup>3</sup>fHBP data for responses to either variant A or B (as indicated) was taken from Ala'Aldeen *et al.* (2010).



Table A10. Analysis of the specificity of serum antibodies for VR1 and VR2 of PorA

| Volunteer/<br>Serum<br>Sample<br>(PorA type of<br>carriage<br>isolate) | Blocking<br>mAb        | Effect of Blocking<br>(Fold change versus unblocked) <sup>2</sup> |              |          |                       |            |               |          |              |
|------------------------------------------------------------------------|------------------------|-------------------------------------------------------------------|--------------|----------|-----------------------|------------|---------------|----------|--------------|
|                                                                        |                        | PorA Variant                                                      |              |          |                       |            |               |          |              |
|                                                                        |                        | P1.5-<br>1,2-2                                                    | P1.19,<br>15 | P1.19,15 | P1.19-<br>1,15-<br>11 | P1.5,2     | P1.5-<br>2,10 | P1.21,16 | P1.7-<br>2,4 |
| V43/S426<br>(P1.21,16)                                                 | Unblocked <sup>1</sup> | 395.6                                                             | 73.3         | 337.8    | 378.1                 | 652.4      | 256.7         | 2465.9   | 239.6        |
|                                                                        | Unblocked              | 1.0                                                               | 1.0          | 1.0      | 1.0                   | 1.0        | 1.0           | 1.0      | 1.0          |
|                                                                        | P1.2                   | 1.9                                                               | 1.1          | 1.1      | 1.2                   | 0.8        | 1.1           | 1.1      | 0.9          |
|                                                                        | P1.5                   | 1.2                                                               | 1.0          | 1.1      | 1.0                   | 0.8        | 1.0           | 1.0      | 0.9          |
|                                                                        | P1.16                  | 1.3                                                               | 1.0          | 1.3      | 1.3                   | 1.3        | 1.9           | 0.2      | 1.0          |
|                                                                        | P1.19                  | 1.1                                                               | 1.0          | 2.8      | 2.0                   | 1.1        | 1.0           | 1.1      | 1.0          |
| V51/S354<br>(P1.21,16)                                                 | Unblocked <sup>1</sup> | 514.9                                                             | 463.8        | 621.2    | 1337.<br>2            | 573.1      | 2173.<br>6    | 25368.5  | 509.7        |
|                                                                        | Unblocked              | 1.0                                                               | 1.0          | 1.0      | 1.0                   | 1.0        | 1.0           | 1.0      | 1.0          |
|                                                                        | P1.2                   | 2.1                                                               | 1.0          | 0.7      | 0.9                   | 1.3        | 1.1           | 1.2      | 0.5          |
|                                                                        | P1.5                   | 1.7                                                               | 1.0          | 0.8      | 1.1                   | 0.5        | 1.3           | 1.3      | 0.6          |
|                                                                        | P1.16                  | 0.6                                                               | 0.8          | 0.6      | 0.9                   | 0.6        | 1.4           | 0.2      | 0.5          |
|                                                                        | P1.19                  | 0.4                                                               | 0.6          | 1.5      | 0.6                   | 0.5        | 0.9           | 1.0      | 0.4          |
| V54/S54<br>(P1.21,16)                                                  | Unblocked <sup>1</sup> | 1135.<br>3                                                        | 486.3        | 1168.3   | 910.3                 | 762.9      | 1370.<br>7    | 4209.5   | 340.1        |
|                                                                        | Unblocked              | 1.0                                                               | 1.0          | 1.0      | 1.0                   | 1.0        | 1.0           | 1.0      | 1.0          |
|                                                                        | P1.2                   | 0.9                                                               | 0.7          | 0.7      | 0.6                   | 0.7        | 0.7           | 0.7      | 0.6          |
|                                                                        | P1.5                   | 1.1                                                               | 0.9          | 1.0      | 1.0                   | 0.9        | 1.0           | 1.0      | 0.8          |
|                                                                        | P1.16                  | 0.9                                                               | 0.9          | 0.6      | 0.6                   | 0.7        | 0.8           | 0.2      | 0.9          |
|                                                                        | P1.19                  | 1.0                                                               | 0.9          | 2.0      | 1.9                   | 0.9        | 0.9           | 1.0      | 0.9          |
| V50/S425<br>(P1.5,2 to<br>P1.5-1,10-1)                                 | Unblocked <sup>1</sup> | 1531.<br>2                                                        | 133.1        | 349.0    | 499.2                 | 2513.<br>9 | 213.9         | 284.6    | 246.8        |
|                                                                        | Unblocked              | 1.0                                                               | 1.0          | 1.0      | 1.0                   | 1.0        | 1.0           | 1.0      | 1.0          |
|                                                                        | P1.2                   | 0.1                                                               | 1.0          | 0.9      | 0.9                   | 0.1        | 0.8           | 0.9      | 0.9          |

|                              |                              |             |            |        |            |             |            |        |            |
|------------------------------|------------------------------|-------------|------------|--------|------------|-------------|------------|--------|------------|
|                              | <b>P1.5</b>                  | 0.1         | 0.7        | 0.5    | 0.5        | 0.4         | 0.4        | 0.5    | 0.6        |
|                              | <b>P1.16</b>                 | 1.0         | 1.1        | 1.1    | 1.0        | 1.1         | 1.2        | 0.5    | 1.0        |
|                              | <b>P1.19</b>                 | 1.0         | 0.8        | 1.2    | 0.7        | 1.0         | 0.6        | 0.6    | 0.7        |
| V114/S238<br>(P1.5,2)        | <b>Unblocked<sup>1</sup></b> | 3677.<br>2  | 296.6      | 2310.0 | 3084.<br>8 | 2233.<br>0  | 1305.<br>2 | 309.0  | 311.4      |
|                              | <b>Unblocked</b>             | 1.0         | 1.0        | 1.0    | 1.0        | 1.0         | 1.0        | 1.0    | 1.0        |
|                              | <b>P1.2</b>                  | 0.4         | 1.1        | 1.0    | 1.0        | 0.4         | 1.1        | 1.1    | 1.1        |
|                              | <b>P1.5</b>                  | 0.2         | 0.8        | 0.8    | 0.8        | 0.5         | 0.8        | 0.9    | 0.9        |
|                              | <b>P1.16</b>                 | 1.0         | 1.0        | 0.9    | 0.8        | 0.9         | 1.0        | 0.5    | 0.8        |
|                              | <b>P1.19</b>                 | 1.0         | 0.8        | 0.3    | 0.2        | 0.9         | 0.9        | 0.9    | 0.8        |
| V64/S348<br>(P1.5-1,10-1)    | <b>Unblocked<sup>1</sup></b> | 1134.<br>9  | 283.8      | 437.7  | 419.4      | 924.3       | 4366.<br>8 | 307.9  | 308.4      |
|                              | <b>Unblocked</b>             | 1.0         | 1.0        | 1.0    | 1.0        | 1.0         | 1.0        | 1.0    | 1.0        |
|                              | <b>P1.2</b>                  | 1.3         | 1.0        | 0.8    | 0.8        | 1.0         | 0.9        | 1.0    | 0.9        |
|                              | <b>P1.5</b>                  | 1.0         | 1.0        | 1.0    | 1.0        | 0.6         | 1.0        | 1.0    | 0.9        |
|                              | <b>P1.16</b>                 | 1.1         | 0.8        | 0.9    | 0.9        | 1.1         | 1.1        | 0.6    | 0.8        |
|                              | <b>P1.19</b>                 | 1.0         | 0.9        | 2.8    | 2.2        | 1.0         | 0.9        | 0.9    | 0.8        |
| V176/S318<br>(P1.19,15)      | <b>Unblocked<sup>1</sup></b> | 1895.<br>9  | 614.8      | 421.7  | 454.8      | 854.9       | 1405.<br>7 | 267.3  | 554.2      |
|                              | <b>Unblocked</b>             | 1.0         | 1.0        | 1.0    | 1.0        | 1.0         | 1.0        | 1.0    | 1.0        |
|                              | <b>P1.2</b>                  | 0.4         | 1.0        | 1.0    | 0.9        | 0.5         | 1.0        | 1.1    | 0.9        |
|                              | <b>P1.5</b>                  | 0.3         | 0.9        | 1.0    | 0.9        | 0.6         | 1.0        | 1.0    | 0.9        |
|                              | <b>P1.16</b>                 | 0.9         | 0.9        | 0.9    | 0.9        | 0.9         | 1.0        | 0.6    | 0.8        |
|                              | <b>P1.19</b>                 | 0.9         | 0.9        | 1.7    | 1.2        | 0.9         | 0.9        | 0.9    | 0.9        |
| V131/S291<br>(P1.19-1,15-11) | <b>Unblocked<sup>1</sup></b> | 2515<br>9.0 | 1221.<br>2 | 5620.6 | 6753.<br>2 | 11347<br>.8 | 8344.<br>3 | 1126.9 | 3365.<br>9 |
|                              | <b>Unblocked</b>             | 1.0         | 1.0        | 1.0    | 1.0        | 1.0         | 1.0        | 1.0    | 1.0        |
|                              | <b>P1.2</b>                  | 0.1         | 1.0        | 1.1    | 1.0        | 0.2         | 1.0        | 1.0    | 1.1        |
|                              | <b>P1.5</b>                  | 0.2         | 1.0        | 1.1    | 1.0        | 0.6         | 1.0        | 1.0    | 1.0        |
|                              | <b>P1.16</b>                 | 0.9         | 0.9        | 0.9    | 0.9        | 0.9         | 1.0        | 0.3    | 0.8        |
|                              | <b>P1.19</b>                 | 0.9         | 0.9        | 0.3    | 0.2        | 0.9         | 0.8        | 0.8    | 0.8        |

<sup>1</sup>This row shows the 'uncorrected AU' units for each variant without blocking; <sup>2</sup>A decrease of >2-fold is highlighted in dark grey while an increase of >2-fold is highlighted in light grey.
